# Supplementary material for: The Relationships between Metabolic Disorders (Hypertension, Dyslipidemia, and Impaired Glucose Tolerance) and Computed Tomography-Based Indices of Hepatic Steatosis or Visceral Fat Accumulation in Middle-Aged Japanese Men
Source: PLoS One. 2016 Mar 3;11(3):e0149689. doi: 10.1371/journal.pone.0149689 (PMC4777390; doi:10.1371/journal.pone.0149689)
Supplement: S1 Data — (XLSX) [file pone.0149689.s001.xlsx]

## Sheet: submitted data
Summarized Data	Hypertensive factor at initial examination; yes=1	Dyslipidemia factor at initial examination; yes =1	Impaired glucose tolerance factor at initial examination; yes =1	Hypertensive factor at latest examination; yes=1	Dyslipidemia factor at latest examination; yes =1	Impaired glucose tolerance factor at latest examination; yes =1	Hypertensive factor development; yes=1	dyslipidemia factor development; yes=1	Impaired glucose tolerance factor factor development; yes=1	At initial examination, VFT<100=yes	At initial examination, L/S>1.0=yes	At lataest examination, VFT<100=yes	At lateset examination, L/S>1.0=yes	Hepatic steatosis development; yes=1	Visceral fa accumulation development; yes-1	HS or VFA	At initial examination, ISI=10000/sqrtFPGxFIRIx2hPGx2hIRI	At latest examination, ISI=10000/sqrtFPGxFIRIx2hPGx2hIRI	ΔISI	ISI exacerbation; ΔISI<0=1	At initial examination, BMI	At latest examination, BMI	ΔBMI	ΔBMI Stratification	At initial examination, CRP	At latest examination, hsCRP	ΔhsCRP	hsCRP exacerbation; ΔCRP>0=yes	Exercise habits	Heavy alcohol consumption	examination interval	Initial examination data	Age	Hight	BW	BMI	Systolic blood pressure	Diastolic blood pressure	HDLC	LDLC	Triglyceride	hsCRP	VFT<100=yes	Visceral fat tissue	L/S>1.0=yes	Mean L value	Mean S value	L/S ratio	1st liver Hu value
Summarized Data	1	0	0	1	0	0	0	0	0	yes	yes	yes	yes	0	0	HS(-)VFA(-)	24.6	14.6	-10	1	22.1	22.3	0.2	0<BMI≤0.6	0.012	0.015	0.003	yes	insufficient	yes	580	Initial examination data	59	174.7	67.5	22.1	147	97	67	82	43	0.012	yes	40.9	yes	67.05	56.2	1.19	67.1
Summarized Data	1	0	0	1	0	0	0	0	0	yes	yes	yes	yes	0	0	HS(-)VFA(-)	5.4	5.2	-0.2	1	20.9	20.8	-0.1	BMI≤0	0.021	0.027	0.006	yes	sufficient	no	1099	Initial examination data	61	164.5	56.6	20.9	163	94	66	125	140	0.021	yes	90.7	yes	62.65	58.7	1.07	64.3
Summarized Data	1	1	0	1	1	0	0	0	0	yes	yes	yes	no	1	0	HS(+)VFA(-)	13.7	7.4	-6.3	1	23	23	0	BMI≤0	0.028	0.026	-0.002	no	insufficient	no	415	Initial examination data	64	171.1	67.3	23	150	91	72	106	158	0.028	yes	73	yes	63.95	54.45	1.17	62.4
Summarized Data	1	0	0	1	1	1	0	1	1	yes	yes	yes	yes	0	0	HS(-)VFA(-)	7.6	4.8	-2.8	1	23.9	24.5	0.6	0<BMI≤0.6	0.466	0.02	-0.446	no	sufficient	no	749	Initial examination data	62	167.6	67.2	23.9	136	89	47	135	117	0.466	yes	67.1	yes	61.5	52.7	1.17	60.4
Summarized Data	0	0	1	1	0	0	1	0	0	yes	yes	yes	yes	0	0	HS(-)VFA(-)	7.2	5.9	-1.3	1	20.7	21.9	1.2	0.6<BMI	0.008	0.018	0.01	yes	insufficient	yes	734	Initial examination data	41	178.7	66	20.7	124	78	51	102	54	0.008	yes	60.1	yes	69.4	57.4	1.21	70.4
Summarized Data	1	0	1	1	0	1	0	0	0	yes	yes	yes	yes	0	0	HS(-)VFA(-)	14	11.5	-2.5	1	22.2	21.6	-0.6	BMI≤0	0.014	0.022	0.008	yes	insufficient	yes	728	Initial examination data	62	169.1	63.5	22.2	133	86	72	114	67	0.014	yes	44.4	yes	64.75	56.2	1.15	62.7
Summarized Data	1	0	0	1	0	0	0	0	0	yes	yes	yes	yes	0	0	HS(-)VFA(-)	7.5	12.6	5.1	0	22.3	21.2	-1.1	BMI≤0	0.022	0.007	-0.015	no	sufficient	yes	531	Initial examination data	74	161.1	58	22.3	136	83	52	154	102	0.022	yes	37.5	yes	66.05	56.15	1.18	64.6
Summarized Data	0	0	0	0	0	0	0	0	0	yes	yes	yes	yes	0	0	HS(-)VFA(-)	8	8.6	0.6	0	23.8	23.9	0.1	0<BMI≤0.6	0.013	0.014	0.001	yes	sufficient	no	728	Initial examination data	44	169.4	68.4	23.8	107	66	69	101	68	0.013	yes	58.7	yes	67.6	57.1	1.18	66.5
Summarized Data	1	0	0	1	0	0	0	0	0	yes	yes	yes	yes	0	0	HS(-)VFA(-)	37.2	26.2	-11	1	19.7	18.9	-0.8	BMI≤0	0.01	0.007	-0.003	no	sufficient	yes	1078	Initial examination data	55	163.9	52.8	19.7	131	85	116	115	52	0.01	yes	17	yes	69.55	55.75	1.25	69.4
Summarized Data	1	0	1	1	0	1	0	0	0	yes	yes	yes	yes	0	0	HS(-)VFA(-)	8	3.8	-4.2	1	23.8	23.6	-0.2	BMI≤0	0.037	0.412	0.375	yes	insufficient	yes	363	Initial examination data	55	167.6	66.9	23.8	136	88	54	109	62	0.037	yes	55.7	yes	64	51.9	1.23	64.8
Summarized Data	1	0	0	0	0	0	0	0	0	yes	yes	yes	yes	0	0	HS(-)VFA(-)	12.6	15.4	2.8	0	19.8	19.1	-0.7	BMI≤0	0.085	0.038	-0.047	no	insufficient	yes	760	Initial examination data	57	173.4	59.6	19.8	149	93	52	124	103	0.085	yes	49.8	yes	67.6	54.8	1.23	67.6
Summarized Data	1	0	0	1	0	1	0	0	1	yes	yes	yes	yes	0	0	HS(-)VFA(-)	18.7	7.8	-10.9	1	18.4	18.7	0.3	0<BMI≤0.6	0.055	0.043	-0.012	no	insufficient	yes	1010	Initial examination data	61	163.7	49.2	18.4	150	94	68	109	56	0.055	yes	27.8	yes	63.15	50.05	1.26	62.9
Summarized Data	0	0	0	0	0	0	0	0	0	yes	yes	yes	yes	0	0	HS(-)VFA(-)	9	16.7	7.7	0	20.8	20.6	-0.2	BMI≤0	0.077	0.025	-0.052	no	insufficient	yes	1077	Initial examination data	62	164.6	56.4	20.8	115	63	75	96	66	0.077	yes	69.3	yes	57.15	52.15	1.1	58.5
Summarized Data	0	1	1	0	1	0	0	0	0	yes	yes	yes	yes	0	0	HS(-)VFA(-)	4.7	8	3.3	0	23.8	24.8	1	0.6<BMI	0.026	0.023	-0.003	no	insufficient	no	1114	Initial examination data	45	177	74.6	23.8	122	82	37	73	417	0.026	yes	98.3	yes	60.95	53.7	1.14	58.4
Summarized Data	1	0	1	1	0	0	0	0	0	yes	yes	yes	yes	0	0	HS(-)VFA(-)	4.6	9.2	4.6	0	21.8	22	0.2	0<BMI≤0.6	0.076	0.025	-0.051	no	sufficient	yes	408	Initial examination data	57	179.3	70.2	21.8	152	90	64	89	81	0.076	yes	45.1	yes	61.2	53.1	1.15	63.3
Summarized Data	0	0	0	1	0	0	1	0	0	yes	yes	yes	yes	0	0	HS(-)VFA(-)	9.3	9.1	-0.2	1	21.6	21	-0.6	BMI≤0	0.032	0.009	-0.023	no	sufficient	yes	412	Initial examination data	59	168.7	61.4	21.6	119	83	42	73	64	0.032	yes	42.3	yes	62.6	54.85	1.14	62.4
Summarized Data	0	0	0	1	0	0	1	0	0	yes	yes	yes	yes	0	0	HS(-)VFA(-)	8.8	5.9	-2.9	1	22.3	23.1	0.8	0.6<BMI	0.857	0.201	-0.656	no	sufficient	yes	1144	Initial examination data	67	169.2	63.8	22.3	110	76	56	82	40	0.857	yes	74.3	yes	57.7	53.15	1.09	60
Summarized Data	0	0	1	0	0	1	0	0	0	yes	yes	yes	yes	0	0	HS(-)VFA(-)	7.7	7	-0.7	1	20.5	20.8	0.3	0<BMI≤0.6	0.012	0.026	0.014	yes	sufficient	yes	728	Initial examination data	60	179.7	66.3	20.5	124	70	55	79	64	0.012	yes	55.9	yes	66.15	55.35	1.2	64.6
Summarized Data	1	0	1	1	0	1	0	0	0	yes	yes	no	yes	0	1	HS(-)VFA(+)	6.5	4.6	-1.9	1	22.9	25.7	2.8	0.6<BMI	0.007	0.024	0.017	yes	insufficient	yes	357	Initial examination data	59	166.5	63.4	22.9	128	81	70	67	40	0.007	yes	79	yes	60.7	57.45	1.06	61
Summarized Data	1	1	0	1	1	0	0	0	0	yes	yes	yes	yes	0	0	HS(-)VFA(-)	8	5.1	-2.9	1	20.3	19.5	-0.8	BMI≤0	0.016	0.006	-0.01	no	sufficient	no	728	Initial examination data	58	175.2	62.2	20.3	137	86	51	109	82	0.016	yes	54.4	yes	65.4	53	1.23	65.2
Summarized Data	0	0	1	0	0	1	0	0	0	yes	yes	yes	yes	0	0	HS(-)VFA(-)	3.4	11.1	7.7	0	24.6	25	0.4	0<BMI≤0.6	0.087	0.073	-0.014	no	sufficient	no	366	Initial examination data	59	164.8	66.8	24.6	98	59	55	76	68	0.087	yes	54.5	yes	61.55	53.1	1.16	63
Summarized Data	0	1	1	0	1	0	0	0	0	yes	yes	yes	yes	0	0	HS(-)VFA(-)	7.8	10.5	2.7	0	21	21	0	BMI≤0	0.018	0.019	0.001	yes	sufficient	yes	1097	Initial examination data	53	174.5	63.9	21	110	78	60	102	220	0.018	yes	97.6	yes	65.05	55.3	1.18	67.6
Summarized Data	1	0	1	1	0	1	0	0	0	yes	yes	yes	yes	0	0	HS(-)VFA(-)	4.1	6.8	2.7	0	24.7	24.3	-0.4	BMI≤0	0.038	0.209	0.171	yes	sufficient	yes	1077	Initial examination data	64	172.5	73.6	24.7	147	90	72	124	93	0.038	yes	86.6	yes	71	53.45	1.33	72.2
Summarized Data	0	0	0	1	0	0	1	0	0	yes	yes	yes	yes	0	0	HS(-)VFA(-)	15	10.5	-4.5	1	24.4	25.3	0.9	0.6<BMI	0.116	0.151	0.035	yes	insufficient	yes	735	Initial examination data	58	161.9	63.9	24.4	126	82	64	151	80	0.116	yes	66.9	yes	70.55	57.15	1.23	67.4
Summarized Data	1	1	1	1	1	1	0	0	0	yes	yes	yes	yes	0	0	HS(-)VFA(-)	6.8	5.1	-1.7	1	24.9	25.6	0.7	0.6<BMI	0.015	0.014	-0.001	no	sufficient	yes	701	Initial examination data	61	168.5	70.6	24.9	139	81	62	89	74	0.015	yes	69.7	yes	64.85	53.85	1.2	66.2
Summarized Data	0	0	0	0	0	0	0	0	0	yes	yes	yes	yes	0	0	HS(-)VFA(-)	16.6	53.4	36.8	0	19.3	18.6	-0.7	BMI≤0	0.009	0.009	0	no	sufficient	no	1105	Initial examination data	56	170.7	56.2	19.3	106	70	88	98	54	0.009	yes	32.6	yes	67.25	56.15	1.2	69.6
Summarized Data	0	0	0	0	0	0	0	0	0	yes	yes	yes	yes	0	0	HS(-)VFA(-)	24	15.7	-8.3	1	17.5	17.6	0.1	0<BMI≤0.6	0.005	0.005	0	no	insufficient	no	574	Initial examination data	60	174.3	53.3	17.5	115	75	91	95	62	0.005	yes	28.2	yes	61.45	54.95	1.12	64.7
Summarized Data	1	0	0	1	0	0	0	0	0	yes	yes	yes	yes	0	0	HS(-)VFA(-)	8.1	8.4	0.3	0	22.1	21.7	-0.4	BMI≤0	0.006	0.005	-0.001	no	sufficient	no	728	Initial examination data	58	163	58.7	22.1	139	96	50	114	139	0.006	yes	72.9	yes	59.3	54.75	1.08	60
Summarized Data	1	0	0	1	0	0	0	0	0	yes	yes	yes	yes	0	0	HS(-)VFA(-)	12.6	13.9	1.3	0	20.5	20.8	0.3	0<BMI≤0.6	0.021	0.008	-0.013	no	sufficient	yes	621	Initial examination data	62	157.7	50.9	20.5	123	85	63	111	63	0.021	yes	39.6	yes	67.95	56.45	1.2	69.1
Summarized Data	1	0	0	1	0	1	0	0	1	yes	yes	yes	yes	0	0	HS(-)VFA(-)	4.7	7.1	2.4	0	22.3	21.3	-1	BMI≤0	0.027	0.016	-0.011	no	sufficient	yes	1071	Initial examination data	57	172.3	66.3	22.3	139	94	70	106	76	0.027	yes	76.7	yes	61.55	50.75	1.21	59.5
Summarized Data	0	1	0	0	0	0	0	0	0	yes	yes	yes	yes	0	0	HS(-)VFA(-)	7.4	9.8	2.4	0	25.3	24.3	-1	BMI≤0	0.013	0.041	0.028	yes	insufficient	no	743	Initial examination data	50	170.8	73.8	25.3	120	82	42	171	154	0.013	yes	71.6	yes	60.35	53.6	1.13	60.4
Summarized Data	1	0	0	1	1	0	0	1	0	yes	yes	no	yes	0	1	HS(-)VFA(+)	7.6	6.8	-0.8	1	21.1	21	-0.1	BMI≤0	0.015	0.009	-0.006	no	insufficient	yes	357	Initial examination data	64	164.9	57.4	21.1	129	78	56	144	126	0.015	yes	94.2	yes	64.7	50.35	1.29	64.5
Summarized Data	1	0	0	1	1	1	0	1	1	yes	yes	no	yes	0	1	HS(-)VFA(+)	2.5	3	0.5	0	22.9	23.7	0.8	0.6<BMI	0.027	0.046	0.019	yes	insufficient	yes	601	Initial examination data	62	166.1	63.2	22.9	138	95	46	103	139	0.027	yes	98.5	yes	58.8	53.4	1.1	60.8
Summarized Data	0	0	0	0	0	1	0	0	1	yes	yes	yes	yes	0	0	HS(-)VFA(-)	9	7.4	-1.6	1	22.1	21.7	-0.4	BMI≤0	0.015	0.013	-0.002	no	sufficient	no	1246	Initial examination data	61	167.3	61.8	22.1	127	73	57	121	55	0.015	yes	64.2	yes	66.25	53.25	1.24	65.7
Summarized Data	1	0	1	1	1	1	0	1	0	yes	yes	yes	yes	0	0	HS(-)VFA(-)	11.1	14.8	3.7	0	22.7	23.9	1.2	0.6<BMI	0.029	0.048	0.019	yes	sufficient	no	1091	Initial examination data	74	165.4	62.1	22.7	126	78	45	105	96	0.029	yes	57.9	yes	66.55	49.45	1.35	67.9
Summarized Data	1	0	0	1	0	0	0	0	0	yes	yes	yes	yes	0	0	HS(-)VFA(-)	6.2	14.6	8.4	0	23.2	22.5	-0.7	BMI≤0	0.031	0.014	-0.017	no	sufficient	no	732	Initial examination data	63	160.3	59.7	23.2	141	96	65	127	48	0.031	yes	84	yes	60.4	54.3	1.11	60.1
Summarized Data	0	0	0	1	1	0	1	1	0	yes	yes	no	yes	0	1	HS(-)VFA(+)	4.3	2.8	-1.5	1	24.6	24.6	0	BMI≤0	0.074	0.132	0.058	yes	insufficient	no	735	Initial examination data	55	178.1	78.1	24.6	129	84	63	191	139	0.074	yes	89.1	yes	62.75	55.4	1.13	63.3
Summarized Data	1	0	0	1	0	1	0	0	1	yes	yes	yes	yes	0	0	HS(-)VFA(-)	16.8	21.9	5.1	0	16.8	17.1	0.3	0<BMI≤0.6	0.011	0.011	0	no	insufficient	yes	372	Initial examination data	56	170.7	49	16.8	137	91	64	89	74	0.011	yes	36.8	yes	65.5	49.2	1.33	66
Summarized Data	0	0	1	0	0	1	0	0	0	yes	yes	yes	yes	0	0	HS(-)VFA(-)	12.4	5.1	-7.3	1	21.6	21.5	-0.1	BMI≤0	0.023	0.342	0.319	yes	sufficient	no	1041	Initial examination data	75	170.6	63	21.6	107	69	58	106	68	0.023	yes	57.5	yes	61.9	50.85	1.22	61.6
Summarized Data	0	0	0	0	1	0	0	1	0	yes	yes	yes	yes	0	0	HS(-)VFA(-)	6.7	15.1	8.4	0	20.4	22	1.6	0.6<BMI	0.116	0.078	-0.038	no	insufficient	no	628	Initial examination data	63	174.3	62	20.4	124	79	44	139	122	0.116	yes	46.7	yes	64.5	50.9	1.27	65.1
Summarized Data	1	0	0	1	0	0	0	0	0	yes	yes	yes	yes	0	0	HS(-)VFA(-)	23.6	8	-15.6	1	21.1	21.4	0.3	0<BMI≤0.6	0.013	0.011	-0.002	no	insufficient	no	384	Initial examination data	53	168.5	59.8	21.1	137	93	78	104	72	0.013	yes	52.7	yes	66	52.6	1.25	66.1
Summarized Data	0	0	0	0	0	0	0	0	0	yes	yes	yes	yes	0	0	HS(-)VFA(-)	7.6	7.7	0.1	0	20.6	20.9	0.3	0<BMI≤0.6	0.021	0.016	-0.005	no	insufficient	no	196	Initial examination data	41	167.3	57.6	20.6	112	74	76	78	86	0.021	yes	28.5	yes	68.65	55.3	1.24	70.6
Summarized Data	1	0	0	0	0	0	0	0	0	yes	yes	yes	yes	0	0	HS(-)VFA(-)	52.4	25.8	-26.6	1	23.1	23.9	0.8	0.6<BMI	0.004	0.003	-0.001	no	sufficient	no	1094	Initial examination data	64	162.3	60.8	23.1	121	87	81	104	38	0.004	yes	51.2	yes	62.1	54.6	1.14	62.8
Summarized Data	0	0	1	0	1	0	0	1	0	yes	yes	yes	yes	0	0	HS(-)VFA(-)	5	11.8	6.8	0	22	22.9	0.9	0.6<BMI	0.38	0.045	-0.335	no	insufficient	no	476	Initial examination data	59	169.6	63.3	22	108	76	43	133	96	0.38	yes	82.6	yes	60.15	55.75	1.08	61
Summarized Data	1	0	0	1	0	0	0	0	0	yes	yes	yes	yes	0	0	HS(-)VFA(-)	7.8	10.9	3.1	0	21.1	20.8	-0.3	BMI≤0	0.025	0.026	0.001	yes	insufficient	yes	684	Initial examination data	61	161.3	54.9	21.1	142	90	80	103	79	0.025	yes	35.3	yes	68.2	56	1.22	70.6
Summarized Data	0	1	1	0	1	1	0	0	0	yes	yes	yes	yes	0	0	HS(-)VFA(-)	4.1	4.6	0.5	0	20.5	20.6	0.1	0<BMI≤0.6	0.02	0.027	0.007	yes	sufficient	no	358	Initial examination data	62	165.3	56	20.5	115	78	43	146	181	0.02	yes	94.2	yes	61.35	52.75	1.16	62.7
Summarized Data	0	0	0	1	0	0	1	0	0	yes	yes	yes	yes	0	0	HS(-)VFA(-)	7.9	6.3	-1.6	1	25.4	24.6	-0.8	BMI≤0	0.015	0.021	0.006	yes	insufficient	yes	736	Initial examination data	57	166.9	70.7	25.4	115	73	60	110	50	0.015	yes	96.1	yes	64.3	56.05	1.15	65.2
Summarized Data	1	0	0	1	1	0	0	1	0	yes	yes	yes	yes	0	0	HS(-)VFA(-)	6.2	4.7	-1.5	1	24.9	21.7	-3.2	BMI≤0	0.1	0.012	-0.088	no	insufficient	no	1092	Initial examination data	57	167.7	69.9	24.9	131	87	77	151	88	0.1	yes	89.7	yes	67.55	53.55	1.26	68.4
Summarized Data	1	0	0	0	0	0	0	0	0	yes	yes	yes	yes	0	0	HS(-)VFA(-)	11.1	10.7	-0.4	1	22.2	22.1	-0.1	BMI≤0	0.026	0.013	-0.013	no	insufficient	no	650	Initial examination data	66	167.1	62	22.2	131	83	61	123	68	0.026	yes	80.2	yes	64.75	50.2	1.29	70.2
Summarized Data	1	1	1	1	1	0	0	0	0	yes	yes	yes	yes	0	0	HS(-)VFA(-)	7.5	13.2	5.7	0	20.2	19.2	-1	BMI≤0	0.04	0.019	-0.021	no	insufficient	yes	743	Initial examination data	52	170.6	58.8	20.2	124	76	59	109	94	0.04	yes	69.9	yes	66.45	52.85	1.26	66.6
Summarized Data	0	0	0	1	0	0	1	0	0	yes	yes	yes	yes	0	0	HS(-)VFA(-)	12.5	6.9	-5.6	1	20.9	21.2	0.3	0<BMI≤0.6	0.014	0.009	-0.005	no	sufficient	no	764	Initial examination data	61	165.3	57.1	20.9	118	82	69	115	67	0.014	yes	32.1	yes	64.6	53.35	1.21	66.5
Summarized Data	1	0	0	1	0	0	0	0	0	yes	yes	yes	yes	0	0	HS(-)VFA(-)	10.5	9.7	-0.8	1	22.9	23.6	0.7	0.6<BMI	0.013	0.045	0.032	yes	insufficient	yes	374	Initial examination data	55	168.7	65.3	22.9	135	90	98	105	50	0.013	yes	44.1	yes	65.25	54.7	1.19	66.9
Summarized Data	1	1	1	1	0	1	0	0	0	yes	yes	yes	yes	0	0	HS(-)VFA(-)	11.2	11.5	0.3	0	19	19.2	0.2	0<BMI≤0.6	1.41	0.632	-0.778	no	insufficient	yes	406	Initial examination data	61	176.1	58.9	19	140	99	35	85	89	1.41	yes	98	yes	62.5	50.75	1.23	61.8
Summarized Data	0	0	0	0	0	0	0	0	0	yes	yes	yes	yes	0	0	HS(-)VFA(-)	9.2	10.7	1.5	0	21.2	22.4	1.2	0.6<BMI	0.034	0.029	-0.005	no	insufficient	yes	456	Initial examination data	57	173.8	64	21.2	127	81	79	128	84	0.034	yes	27.6	yes	68.9	59.55	1.16	68.9
Summarized Data	0	0	0	0	0	1	0	0	1	yes	yes	yes	yes	0	0	HS(-)VFA(-)	9	5.4	-3.6	1	20.8	21.7	0.9	0.6<BMI	0.027	0.028	0.001	yes	insufficient	no	747	Initial examination data	63	172.7	62.1	20.8	97	59	59	119	79	0.027	yes	44.6	yes	65.8	63.25	1.04	64.5
Summarized Data	1	0	0	1	1	0	0	1	0	yes	yes	yes	yes	0	0	HS(-)VFA(-)	10.6	14.7	4.1	0	22.5	23.6	1.1	0.6<BMI	0.028	0.015	-0.013	no	sufficient	no	771	Initial examination data	53	176.9	70.5	22.5	129	90	67	152	97	0.028	yes	70.5	yes	67.95	53.2	1.28	68.5
Summarized Data	1	0	0	1	0	0	0	0	0	yes	yes	yes	yes	0	0	HS(-)VFA(-)	11.6	8.4	-3.2	1	22	22.3	0.3	0<BMI≤0.6	0.088	0.056	-0.032	no	sufficient	yes	721	Initial examination data	57	165.4	60.3	22	108	71	81	124	87	0.088	yes	41.7	yes	71.45	52.55	1.36	73.3
Summarized Data	0	0	0	0	0	0	0	0	0	yes	yes	yes	yes	0	0	HS(-)VFA(-)	5.8	7.5	1.7	0	23.3	23.5	0.2	0<BMI≤0.6	0.319	0.221	-0.098	no	insufficient	no	762	Initial examination data	51	172	69	23.3	106	69	45	96	117	0.319	yes	83.3	yes	54.85	53.1	1.03	55
Summarized Data	0	0	0	0	0	0	0	0	0	yes	yes	yes	yes	0	0	HS(-)VFA(-)	9.8	8.8	-1	1	21.2	20.7	-0.5	BMI≤0	0.025	0.016	-0.009	no	insufficient	no	719	Initial examination data	64	161.5	55.4	21.2	114	80	89	129	67	0.025	yes	43.9	yes	61.75	56.55	1.09	60.7
Summarized Data	0	1	0	0	1	0	0	0	0	yes	yes	yes	yes	0	0	HS(-)VFA(-)	5.4	11.1	5.7	0	24.1	23.3	-0.8	BMI≤0	0.111	0.135	0.024	yes	insufficient	yes	1098	Initial examination data	64	168.2	68.2	24.1	108	68	46	140	208	0.111	yes	91.6	yes	59.4	52.25	1.14	63.5
Summarized Data	0	0	0	0	0	0	0	0	0	yes	yes	yes	yes	0	0	HS(-)VFA(-)	10.3	11.5	1.2	0	21.2	20.7	-0.5	BMI≤0	0.05	0.067	0.017	yes	insufficient	no	427	Initial examination data	58	172.7	63.3	21.2	114	72	73	108	35	0.05	yes	51.4	yes	58.95	53.05	1.11	59.8
Summarized Data	0	0	0	1	0	0	1	0	0	yes	yes	yes	yes	0	0	HS(-)VFA(-)	8.5	9.3	0.8	0	21.1	21.3	0.2	0<BMI≤0.6	0.018	0.009	-0.009	no	sufficient	no	1098	Initial examination data	57	159.7	53.8	21.1	109	69	54	62	55	0.018	yes	61.4	yes	66.1	55.2	1.2	68.4
Summarized Data	0	0	1	0	0	1	0	0	0	yes	yes	yes	yes	0	0	HS(-)VFA(-)	6.8	7.1	0.3	0	21.7	21.9	0.2	0<BMI≤0.6	0.048	0.034	-0.014	no	sufficient	yes	1154	Initial examination data	56	173.9	65.6	21.7	120	78	60	117	102	0.048	yes	88.3	yes	63.55	54.6	1.16	64.8
Summarized Data	1	0	0	1	0	0	0	0	0	yes	yes	yes	no	1	0	HS(+)VFA(-)	6.9	5.4	-1.5	1	24.9	25.4	0.5	0<BMI≤0.6	0.058	0.115	0.057	yes	insufficient	no	1037	Initial examination data	55	172.7	74.2	24.9	156	99	60	129	122	0.058	yes	82.5	yes	58.15	54.9	1.06	54.7
Summarized Data	1	0	0	1	1	0	0	1	0	yes	yes	yes	yes	0	0	HS(-)VFA(-)	6.3	5.1	-1.2	1	25.8	26.8	1	0.6<BMI	0.012	0.02	0.008	yes	insufficient	no	753	Initial examination data	61	159.5	65.7	25.8	145	87	54	161	64	0.012	yes	71.7	yes	61.95	49.8	1.24	63.2
Summarized Data	0	0	0	0	0	0	0	0	0	yes	yes	yes	yes	0	0	HS(-)VFA(-)	19.1	14.6	-4.5	1	20	20.1	0.1	0<BMI≤0.6	0.28	0.091	-0.189	no	sufficient	no	1072	Initial examination data	56	168.3	56.6	20	116	74	57	58	54	0.28	yes	41.7	yes	56.95	56.45	1.01	60.6
Summarized Data	1	0	0	0	0	0	0	0	0	yes	yes	no	yes	0	1	HS(-)VFA(+)	6.9	4.9	-2	1	22.8	23.5	0.7	0.6<BMI	0.017	0.015	-0.002	no	insufficient	no	378	Initial examination data	49	160.8	58.9	22.8	129	91	53	124	101	0.017	yes	93.1	yes	65.4	53.65	1.22	66.3
Summarized Data	1	0	1	0	0	0	0	0	0	yes	yes	yes	yes	0	0	HS(-)VFA(-)	4.9	7.6	2.7	0	23.4	22.9	-0.5	BMI≤0	0.031	0.021	-0.01	no	insufficient	yes	721	Initial examination data	65	164	62.9	23.4	130	81	60	129	74	0.031	yes	85.1	yes	68.75	51.7	1.33	68.5
Summarized Data	1	0	1	1	0	1	0	0	0	yes	yes	yes	yes	0	0	HS(-)VFA(-)	4.9	4.5	-0.4	1	22.4	23	0.6	0<BMI≤0.6	0.032	0.011	-0.021	no	insufficient	yes	1077	Initial examination data	58	173.3	67.2	22.4	139	92	92	110	65	0.032	yes	69	yes	63.15	51.45	1.23	66.4
Summarized Data	1	0	0	1	0	0	0	0	0	yes	yes	yes	yes	0	0	HS(-)VFA(-)	10.4	12	1.6	0	23.3	21.6	-1.7	BMI≤0	0.019	0.014	-0.005	no	insufficient	no	1122	Initial examination data	62	163	61.8	23.3	132	85	64	100	75	0.019	yes	99.5	yes	65.1	53.45	1.22	65.1
Summarized Data	0	0	0	0	0	1	0	0	1	yes	yes	yes	yes	0	0	HS(-)VFA(-)	28.6	10.4	-18.2	1	22.7	21.7	-1	BMI≤0	1.2	0.077	-1.123	no	sufficient	no	832	Initial examination data	58	169.6	65.3	22.7	118	77	63	139	36	1.2	yes	47.9	yes	59.5	54.9	1.08	58.3
Summarized Data	0	0	0	0	0	1	0	0	1	yes	yes	yes	yes	0	0	HS(-)VFA(-)	6.3	4.1	-2.2	1	17.3	18.1	0.8	0.6<BMI	0.01	0.03	0.02	yes	insufficient	no	1048	Initial examination data	40	177.5	54.5	17.3	119	77	104	98	35	0.01	yes	27.2	yes	63.4	55.25	1.15	65.2
Summarized Data	1	0	0	1	0	0	0	0	0	yes	yes	yes	yes	0	0	HS(-)VFA(-)	11	20.6	9.6	0	19.3	19.4	0.1	0<BMI≤0.6	0.052	0.051	-0.001	no	insufficient	yes	644	Initial examination data	57	162.3	50.9	19.3	156	93	81	78	105	0.052	yes	64.5	yes	66.4	59.05	1.12	65.6
Summarized Data	1	0	0	0	0	0	0	0	0	yes	yes	yes	yes	0	0	HS(-)VFA(-)	5	12.7	7.7	0	20.8	21	0.2	0<BMI≤0.6	0.013	0.012	-0.001	no	insufficient	no	427	Initial examination data	60	158.7	52.4	20.8	139	78	75	162	72	0.013	yes	75.4	yes	64.1	58.85	1.09	63.9
Summarized Data	1	0	1	1	0	1	0	0	0	yes	yes	yes	yes	0	0	HS(-)VFA(-)	3.5	3.7	0.2	0	19.2	18.7	-0.5	BMI≤0	0.01	0.026	0.016	yes	insufficient	yes	1130	Initial examination data	58	182.6	63.9	19.2	140	88	74	74	87	0.01	yes	57.8	yes	69.85	54.1	1.29	71.3
Summarized Data	0	1	0	1	1	1	1	0	1	yes	yes	yes	yes	0	0	HS(-)VFA(-)	18.2	10.9	-7.3	1	23.4	23	-0.4	BMI≤0	0.068	0.105	0.037	yes	sufficient	no	1094	Initial examination data	56	157	57.7	23.4	121	80	57	72	98	0.068	yes	72.6	yes	66.4	57.5	1.15	67.4
Summarized Data	0	0	0	0	0	0	0	0	0	yes	yes	yes	yes	0	0	HS(-)VFA(-)	9.4	9.2	-0.2	1	24.1	24.7	0.6	0<BMI≤0.6	0.024	0.023	-0.001	no	sufficient	no	1092	Initial examination data	56	172.6	71.8	24.1	114	73	61	139	74	0.024	yes	39.2	yes	63.3	54.5	1.16	61.9
Summarized Data	1	0	0	1	0	0	0	0	0	yes	yes	no	yes	0	1	HS(-)VFA(+)	22.4	13.9	-8.5	1	23.3	24	0.7	0.6<BMI	0.012	0.017	0.005	yes	insufficient	yes	1098	Initial examination data	55	175.6	71.9	23.3	127	86	89	87	61	0.012	yes	81.3	yes	66.8	55.75	1.2	66.8
Summarized Data	0	1	0	0	1	0	0	0	0	yes	yes	yes	yes	0	0	HS(-)VFA(-)	7.1	4.2	-2.9	1	22.6	21.8	-0.8	BMI≤0	0.01	0.005	-0.005	no	insufficient	no	735	Initial examination data	60	163.5	60.3	22.6	109	69	86	124	126	0.01	yes	63.5	yes	67.1	50.9	1.32	69.2
Summarized Data	0	0	1	0	0	1	0	0	0	yes	yes	yes	yes	0	0	HS(-)VFA(-)	9.4	10.8	1.4	0	23.7	23.7	0	BMI≤0	0.013	0.009	-0.004	no	sufficient	yes	377	Initial examination data	62	169.9	68.3	23.7	124	72	104	143	49	0.013	yes	56.1	yes	56.7	51.5	1.1	55.7
Summarized Data	1	0	0	1	0	0	0	0	0	yes	yes	yes	yes	0	0	HS(-)VFA(-)	3.8	5	1.2	0	22.8	22.2	-0.6	BMI≤0	0.08	0.081	0.001	yes	sufficient	no	737	Initial examination data	62	174.3	69.3	22.8	151	97	54	177	116	0.08	yes	96	yes	61.25	56.45	1.09	60.7
Summarized Data	1	1	0	1	0	0	0	0	0	yes	yes	yes	yes	0	0	HS(-)VFA(-)	10.2	20.5	10.3	0	23	22.6	-0.4	BMI≤0	0.101	0.005	-0.096	no	sufficient	yes	882	Initial examination data	61	171.8	68	23	129	87	65	139	173	0.101	yes	45	yes	66.8	53	1.26	67
Summarized Data	1	0	0	1	0	0	0	0	0	yes	yes	yes	yes	0	0	HS(-)VFA(-)	10.5	18.7	8.2	0	17.5	17.7	0.2	0<BMI≤0.6	0.076	2.05	1.974	yes	insufficient	no	734	Initial examination data	51	180.7	57.2	17.5	119	79	66	87	76	0.076	yes	52.4	yes	62.35	53.55	1.16	62.6
Summarized Data	0	0	0	0	0	0	0	0	0	yes	yes	no	yes	0	1	HS(-)VFA(+)	12.3	13.9	1.6	0	26.8	26.5	-0.3	BMI≤0	0.102	0.181	0.079	yes	insufficient	yes	364	Initial examination data	59	165.1	73.1	26.8	124	84	106	82	107	0.102	yes	93	yes	63.05	51.2	1.23	64.3
Summarized Data	0	1	0	0	1	0	0	0	0	yes	yes	yes	yes	0	0	HS(-)VFA(-)	5.7	11	5.3	0	19.7	19.9	0.2	0<BMI≤0.6	0.025	0.044	0.019	yes	insufficient	no	1162	Initial examination data	57	172.1	58.3	19.7	95	63	63	92	133	0.025	yes	36.3	yes	64.15	52.55	1.22	63.6
Summarized Data	0	0	1	0	0	1	0	0	0	yes	yes	yes	yes	0	0	HS(-)VFA(-)	7.1	5.4	-1.7	1	25.3	25	-0.3	BMI≤0	0.037	0.044	0.007	yes	sufficient	no	759	Initial examination data	54	167.7	71.1	25.3	100	62	43	124	131	0.037	yes	55	yes	57.1	53.35	1.07	58.5
Summarized Data	1	0	1	0	0	1	0	0	0	yes	yes	yes	yes	0	0	HS(-)VFA(-)	16.8	27.1	10.3	0	21.3	20.9	-0.4	BMI≤0	0.012	0.016	0.004	yes	sufficient	no	732	Initial examination data	56	175.9	66	21.3	142	95	94	103	36	0.012	yes	36.7	yes	66.7	54.6	1.22	69.8
Summarized Data	0	0	1	1	0	1	1	0	0	yes	yes	yes	yes	0	0	HS(-)VFA(-)	5.4	4.7	-0.7	1	21.3	21.1	-0.2	BMI≤0	0.025	0.024	-0.001	no	insufficient	no	274	Initial examination data	59	172.9	63.7	21.3	119	73	61	108	96	0.025	yes	57.3	yes	57.75	52.1	1.11	59.9
Summarized Data	1	0	0	1	1	0	0	1	0	yes	yes	yes	yes	0	0	HS(-)VFA(-)	10.4	10	-0.4	1	22.4	22.5	0.1	0<BMI≤0.6	0.006	0.004	-0.002	no	sufficient	no	631	Initial examination data	63	166.1	61.7	22.4	138	81	46	130	123	0.006	yes	46.4	yes	62.7	55.7	1.13	62.4
Summarized Data	0	0	1	1	0	1	1	0	0	yes	yes	yes	yes	0	0	HS(-)VFA(-)	8.9	4.7	-4.2	1	22.8	23.6	0.8	0.6<BMI	0.026	0.026	0	no	insufficient	yes	729	Initial examination data	77	163.1	60.6	22.8	125	79	64	102	35	0.026	yes	66.6	yes	55.75	55.1	1.01	56.3
Summarized Data	0	0	0	0	0	1	0	0	1	yes	yes	yes	no	1	0	HS(+)VFA(-)	12	10.3	-1.7	1	21.6	21.4	-0.2	BMI≤0	0.02	0.077	0.057	yes	insufficient	yes	413	Initial examination data	56	164.7	58.7	21.6	111	68	95	108	59	0.02	yes	23	yes	60.8	53.5	1.14	61.9
Summarized Data	0	1	1	0	1	1	0	0	0	yes	yes	no	yes	0	1	HS(-)VFA(+)	12.2	8.9	-3.3	1	22.4	23.3	0.9	0.6<BMI	0.043	0.027	-0.016	no	insufficient	yes	1077	Initial examination data	57	172.6	66.8	22.4	129	81	52	98	218	0.043	yes	97.2	yes	63.25	51.35	1.23	66.7
Summarized Data	1	0	0	0	0	0	0	0	0	yes	yes	yes	yes	0	0	HS(-)VFA(-)	5.2	13.8	8.6	0	26.9	23.7	-3.2	BMI≤0	0.042	0.016	-0.026	no	insufficient	no	999	Initial examination data	53	165.5	73.8	26.9	124	85	50	160	100	0.042	yes	86.3	yes	59.95	47.85	1.25	62.5
Summarized Data	1	0	1	1	0	1	0	0	0	yes	yes	yes	yes	0	0	HS(-)VFA(-)	8.3	11.3	3	0	23.8	23.1	-0.7	BMI≤0	0.032	0.019	-0.013	no	insufficient	yes	237	Initial examination data	56	173.5	71.5	23.8	173	96	86	138	39	0.032	yes	41.5	yes	68.7	52.75	1.3	69.8
Summarized Data	1	0	0	0	1	0	0	1	0	yes	yes	yes	yes	0	0	HS(-)VFA(-)	3.7	4.8	1.1	0	21.7	21.7	0	BMI≤0	0.082	2.06	1.978	yes	insufficient	yes	1262	Initial examination data	52	168.9	62	21.7	145	94	46	151	138	0.082	yes	92.5	yes	57.75	51.2	1.13	56.9
Summarized Data	0	0	0	0	0	0	0	0	0	yes	yes	yes	yes	0	0	HS(-)VFA(-)	9.2	11.8	2.6	0	22	22	0	BMI≤0	0.087	0.066	-0.021	no	sufficient	yes	364	Initial examination data	54	164.9	59.9	22	106	70	70	110	60	0.087	yes	34.9	yes	68.8	52.9	1.3	65.3
Summarized Data	1	1	0	1	1	0	0	0	0	yes	yes	yes	yes	0	0	HS(-)VFA(-)	8.3	8.6	0.3	0	21.7	22.3	0.6	0<BMI≤0.6	0.02	0.029	0.009	yes	sufficient	no	1147	Initial examination data	55	170	62.8	21.7	134	86	70	110	96	0.02	yes	61.5	yes	64.25	52.25	1.23	66
Summarized Data	1	0	0	0	0	0	0	0	0	yes	yes	yes	yes	0	0	HS(-)VFA(-)	7.8	8.1	0.3	0	21.2	22	0.8	0.6<BMI	0.009	0.003	-0.006	no	insufficient	no	1058	Initial examination data	55	176.1	65.7	21.2	136	78	76	117	32	0.009	yes	39.5	yes	61.05	52.15	1.17	62
Summarized Data	0	0	0	0	0	1	0	0	1	yes	yes	yes	yes	0	0	HS(-)VFA(-)	26.2	20.4	-5.8	1	18.2	17.6	-0.6	BMI≤0	0.019	0.015	-0.004	no	insufficient	yes	697	Initial examination data	52	171.6	53.7	18.2	123	74	53	87	95	0.019	yes	29.6	yes	63.45	54.15	1.17	63.2
Summarized Data	0	0	1	0	1	1	0	1	0	yes	yes	yes	yes	0	0	HS(-)VFA(-)	8.2	10.7	2.5	0	20.6	21.5	0.9	0.6<BMI	0.008	0.011	0.003	yes	sufficient	yes	1059	Initial examination data	54	168.4	58.4	20.6	117	77	95	120	143	0.008	yes	58.2	yes	68.4	57.4	1.19	67.6
Summarized Data	1	1	1	1	1	1	0	0	0	yes	yes	yes	yes	0	0	HS(-)VFA(-)	4.7	5.9	1.2	0	20.2	19.9	-0.3	BMI≤0	0.017	0.019	0.002	yes	insufficient	yes	371	Initial examination data	62	167.6	56.8	20.2	140	79	61	105	77	0.017	yes	62	yes	57.6	53.6	1.07	56.3
Summarized Data	0	0	1	0	0	1	0	0	0	yes	yes	yes	yes	0	0	HS(-)VFA(-)	11.4	6.4	-5	1	23.2	22.9	-0.3	BMI≤0	0.022	0.016	-0.006	no	sufficient	yes	734	Initial examination data	55	177.4	73	23.2	126	82	66	105	87	0.022	yes	44	yes	64.95	52.6	1.23	68.6
Summarized Data	0	0	1	0	0	0	0	0	0	yes	yes	yes	yes	0	0	HS(-)VFA(-)	8.1	9.6	1.5	0	20.7	20.8	0.1	0<BMI≤0.6	0.017	0.011	-0.006	no	sufficient	no	1085	Initial examination data	61	160.1	53.1	20.7	117	76	91	150	57	0.017	yes	25.6	yes	64.25	48.5	1.32	64.6
Summarized Data	0	0	0	0	0	0	0	0	0	yes	yes	yes	yes	0	0	HS(-)VFA(-)	7.4	7.6	0.2	0	22	22.3	0.3	0<BMI≤0.6	0.125	0.022	-0.103	no	insufficient	yes	715	Initial examination data	58	163.9	59.1	22	124	83	58	116	56	0.125	yes	71.8	yes	62.7	57.4	1.09	62.6
Summarized Data	0	0	0	0	0	0	0	0	0	yes	yes	yes	yes	0	0	HS(-)VFA(-)	10.4	15.4	5	0	21.9	22.1	0.2	0<BMI≤0.6	0.005	0.002	-0.003	no	insufficient	no	1065	Initial examination data	56	182.4	72.9	21.9	125	78	66	110	86	0.005	yes	73.1	yes	58.55	54.85	1.07	58.8
Summarized Data	1	0	0	1	1	0	0	1	0	yes	yes	yes	yes	0	0	HS(-)VFA(-)	4.4	4.7	0.3	0	24.5	23.8	-0.7	BMI≤0	0.026	0.028	0.002	yes	sufficient	no	365	Initial examination data	51	167.8	69	24.5	137	93	52	114	136	0.026	yes	92.7	yes	65.05	51.1	1.27	65.3
Summarized Data	0	0	0	0	0	0	0	0	0	yes	yes	no	yes	0	1	HS(-)VFA(+)	7.5	8.7	1.2	0	21.9	22.3	0.4	0<BMI≤0.6	0.08	0.51	0.43	yes	sufficient	no	1182	Initial examination data	56	171	63.9	21.9	114	74	68	121	82	0.08	yes	94.8	yes	63.5	57.95	1.1	63
Summarized Data	0	0	0	0	0	0	0	0	0	yes	yes	yes	yes	0	0	HS(-)VFA(-)	8.3	9.5	1.2	0	19.9	19.6	-0.3	BMI≤0	0.013	0.004	-0.009	no	insufficient	no	1086	Initial examination data	58	168.5	56.6	19.9	125	82	67	106	56	0.013	yes	35.6	yes	64.65	53.4	1.21	63.9
Summarized Data	1	0	1	1	0	1	0	0	0	yes	yes	yes	yes	0	0	HS(-)VFA(-)	7.1	7.9	0.8	0	20.7	20.4	-0.3	BMI≤0	0.037	0.026	-0.011	no	insufficient	no	378	Initial examination data	62	168.7	58.9	20.7	146	93	76	83	72	0.037	yes	30.8	yes	65.6	56.55	1.16	68.3
Summarized Data	1	0	0	1	0	0	0	0	0	yes	yes	no	no	1	1	HS(+)VFA(+)	5.7	4.5	-1.2	1	26.5	26.4	-0.1	BMI≤0	0.015	0.041	0.026	yes	insufficient	no	1097	Initial examination data	53	164.6	71.9	26.5	147	98	53	123	87	0.015	yes	77.5	yes	60.85	55	1.11	61
Summarized Data	0	0	0	0	0	0	0	0	0	yes	yes	yes	yes	0	0	HS(-)VFA(-)	15.7	11	-4.7	1	20.3	20.5	0.2	0<BMI≤0.6	0.008	0.006	-0.002	no	sufficient	no	1132	Initial examination data	54	161.3	52.9	20.3	118	78	71	91	41	0.008	yes	26.5	yes	58.8	54.15	1.09	58.1
Summarized Data	1	0	0	1	1	1	0	1	1	yes	yes	no	yes	0	1	HS(-)VFA(+)	10.3	5.6	-4.7	1	22.5	24	1.5	0.6<BMI	0.018	0.075	0.057	yes	insufficient	yes	1028	Initial examination data	56	175.1	69	22.5	122	83	69	108	82	0.018	yes	72	yes	67.45	53.35	1.26	68.4
Summarized Data	0	0	0	0	0	0	0	0	0	yes	yes	yes	yes	0	0	HS(-)VFA(-)	6.7	8.7	2	0	19.9	20.5	0.6	0<BMI≤0.6	0.006	0.009	0.003	yes	insufficient	no	980	Initial examination data	56	189.3	71.4	19.9	126	78	53	144	112	0.006	yes	71.6	yes	70.65	52.7	1.34	72.8
Summarized Data	1	0	0	1	0	1	0	0	1	yes	yes	no	no	1	1	HS(+)VFA(+)	6.9	5.9	-1	1	22.2	23.1	0.9	0.6<BMI	0.018	0.034	0.016	yes	insufficient	yes	1070	Initial examination data	48	170.5	64.6	22.2	159	104	73	106	93	0.018	yes	97	yes	58.95	55.6	1.06	64.3
Summarized Data	1	1	1	1	1	1	0	0	0	yes	yes	no	yes	0	1	HS(-)VFA(+)	3.9	2.6	-1.3	1	20.9	21.6	0.7	0.6<BMI	0.035	2.12	2.085	yes	insufficient	no	1218	Initial examination data	60	171.3	61.4	20.9	116	72	90	118	46	0.035	yes	98.8	yes	58.8	54	1.09	58.2
Summarized Data	0	0	0	1	0	0	1	0	0	yes	yes	yes	yes	0	0	HS(-)VFA(-)	19.3	10.9	-8.4	1	21.8	21.5	-0.3	BMI≤0	0.01	0.008	-0.002	no	insufficient	yes	1099	Initial examination data	52	176.6	67.9	21.8	109	79	66	82	65	0.01	yes	44.5	yes	70.65	55.6	1.27	73
Summarized Data	1	0	1	1	0	1	0	0	0	yes	yes	no	no	1	1	HS(+)VFA(+)	5.7	5.8	0.1	0	21.3	20.6	-0.7	BMI≤0	0.062	0.059	-0.003	no	sufficient	no	1175	Initial examination data	70	164.9	57.9	21.3	127	75	66	121	48	0.062	yes	90.2	yes	53	52.2	1.02	53.6
Summarized Data	1	0	0	1	0	0	0	0	0	yes	yes	yes	yes	0	0	HS(-)VFA(-)	13	13.7	0.7	0	25.6	25.7	0.1	0<BMI≤0.6	0.065	0.042	-0.023	no	sufficient	no	464	Initial examination data	52	167.4	71.8	25.6	132	95	76	117	77	0.065	yes	55.6	yes	62.55	53.65	1.17	60.9
Summarized Data	1	0	1	1	0	0	0	0	0	yes	yes	no	yes	0	1	HS(-)VFA(+)	5.1	8.7	3.6	0	24.7	25.5	0.8	0.6<BMI	0.026	0.015	-0.011	no	insufficient	no	1171	Initial examination data	54	168.9	70.4	24.7	139	89	50	105	86	0.026	yes	68.9	yes	58.3	50.35	1.16	58.9
Summarized Data	0	0	1	0	0	0	0	0	0	yes	yes	yes	yes	0	0	HS(-)VFA(-)	9.5	8	-1.5	1	25.4	23.8	-1.6	BMI≤0	0.073	0.024	-0.049	no	insufficient	no	665	Initial examination data	56	164.2	68.6	25.4	115	81	54	150	122	0.073	yes	95.1	yes	56.1	52.8	1.06	58.7
Summarized Data	0	1	1	0	1	1	0	0	0	yes	yes	yes	yes	0	0	HS(-)VFA(-)	8.6	12.1	3.5	0	20.5	20.4	-0.1	BMI≤0	0.075	0.051	-0.024	no	insufficient	yes	1058	Initial examination data	54	174.6	62.6	20.5	127	81	64	113	80	0.075	yes	54.4	yes	70.55	55.85	1.26	71.1
Summarized Data	1	1	0	1	1	0	0	0	0	yes	yes	yes	yes	0	0	HS(-)VFA(-)	12.4	10.4	-2	1	25.9	24.8	-1.1	BMI≤0	0.011	0.153	0.142	yes	sufficient	no	1038	Initial examination data	60	164.1	69.7	25.9	156	96	64	151	110	0.011	yes	86.1	yes	66.75	54.2	1.23	66.5
Summarized Data	0	1	0	0	1	0	0	0	0	yes	yes	yes	yes	0	0	HS(-)VFA(-)	13.7	22.4	8.7	0	18.8	18.6	-0.2	BMI≤0	0.019	0.02	0.001	yes	insufficient	no	357	Initial examination data	59	161.6	49.1	18.8	107	61	41	110	182	0.019	yes	61	yes	66.35	52.3	1.27	67.4
Summarized Data	1	0	0	1	0	0	0	0	0	yes	yes	yes	yes	0	0	HS(-)VFA(-)	7.5	16.4	8.9	0	23.3	22.9	-0.4	BMI≤0	0.021	0.021	0	no	insufficient	yes	733	Initial examination data	48	174.5	71	23.3	131	85	69	140	95	0.021	yes	87.2	yes	72.6	56.3	1.29	69.8
Summarized Data	0	0	0	0	0	0	0	0	0	yes	yes	yes	yes	0	0	HS(-)VFA(-)	13.1	8.6	-4.5	1	21.2	21.9	0.7	0.6<BMI	0.076	0.191	0.115	yes	insufficient	yes	1185	Initial examination data	51	181.6	69.8	21.2	106	68	53	127	140	0.076	yes	87.7	yes	65.15	56.8	1.15	66.6
Summarized Data	0	1	1	1	1	0	1	0	0	yes	yes	yes	no	1	0	HS(+)VFA(-)	7.2	9.3	2.1	0	24	23.7	-0.3	BMI≤0	0.024	0.018	-0.006	no	insufficient	yes	1070	Initial examination data	53	172.1	71.2	24	123	84	48	110	183	0.024	yes	78.4	yes	56.8	53.35	1.06	56.8
Summarized Data	0	0	0	0	0	0	0	0	0	yes	yes	yes	yes	0	0	HS(-)VFA(-)	9.8	10.6	0.8	0	22.3	22.8	0.5	0<BMI≤0.6	0.03	0.008	-0.022	no	insufficient	yes	657	Initial examination data	53	170.2	64.5	22.3	101	63	62	148	92	0.03	yes	49.1	yes	65.7	55.45	1.18	66.4
Summarized Data	0	1	0	0	1	1	0	0	1	yes	yes	no	yes	0	1	HS(-)VFA(+)	4.9	4.9	0	0	23.6	24.2	0.6	0<BMI≤0.6	0.031	0.279	0.248	yes	insufficient	no	426	Initial examination data	53	158.4	59.1	23.6	118	83	84	107	115	0.031	yes	94	yes	62.65	56.35	1.11	62.3
Summarized Data	0	0	0	0	0	0	0	0	0	yes	yes	yes	yes	0	0	HS(-)VFA(-)	7.1	12.8	5.7	0	25	24.7	-0.3	BMI≤0	0.081	0.097	0.016	yes	sufficient	yes	774	Initial examination data	59	163.7	67.1	25	120	82	53	123	126	0.081	yes	89.1	yes	61	51.55	1.18	60.7
Summarized Data	0	0	1	0	0	0	0	0	0	yes	yes	yes	yes	0	0	HS(-)VFA(-)	9.3	11.1	1.8	0	20.9	20.8	-0.1	BMI≤0	0.023	0.017	-0.006	no	insufficient	yes	635	Initial examination data	65	167.4	58.6	20.9	116	80	81	118	52	0.023	yes	85.4	yes	63.45	53	1.2	62.3
Summarized Data	1	0	0	0	0	0	0	0	0	yes	yes	yes	yes	0	0	HS(-)VFA(-)	11.9	12.9	1	0	20.7	20.7	0	BMI≤0	1.4	0.113	-1.287	no	sufficient	yes	643	Initial examination data	59	183.7	69.8	20.7	136	84	57	70	60	1.4	yes	54.1	yes	63.75	52.95	1.2	65.8
Summarized Data	1	0	0	1	0	0	0	0	0	yes	yes	yes	yes	0	0	HS(-)VFA(-)	5.6	7.4	1.8	0	23.1	23.7	0.6	0<BMI≤0.6	0.059	0.041	-0.018	no	insufficient	yes	1099	Initial examination data	57	174.3	70.1	23.1	132	91	58	111	97	0.059	yes	62.8	yes	66.4	58.05	1.14	68.4
Summarized Data	0	0	0	0	0	0	0	0	0	yes	yes	yes	yes	0	0	HS(-)VFA(-)	8.9	9	0.1	0	20.7	21.5	0.8	0.6<BMI	0.011	0.007	-0.004	no	insufficient	no	1099	Initial examination data	56	173	62.1	20.7	122	79	70	133	72	0.011	yes	28.7	yes	62	58.6	1.06	60.9
Summarized Data	0	0	0	0	0	0	0	0	0	yes	yes	yes	yes	0	0	HS(-)VFA(-)	9.2	7.6	-1.6	1	24	22.5	-1.5	BMI≤0	0.01	0.011	0.001	yes	sufficient	yes	1120	Initial examination data	56	170	69.3	24	116	77	73	118	96	0.01	yes	64.6	yes	58.3	56.75	1.03	57.8
Summarized Data	0	0	0	0	0	0	0	0	0	yes	yes	yes	yes	0	0	HS(-)VFA(-)	16.1	25.3	9.2	0	21.3	21.9	0.6	0<BMI≤0.6	0.01	0.004	-0.006	no	sufficient	yes	346	Initial examination data	47	179.2	68.5	21.3	102	68	113	59	25	0.01	yes	21.3	yes	64.15	52.75	1.22	65.3
Summarized Data	0	0	0	1	0	0	1	0	0	yes	yes	yes	yes	0	0	HS(-)VFA(-)	34.8	10.4	-24.4	1	15.5	15.8	0.3	0<BMI≤0.6	0.005	0.004	-0.001	no	insufficient	yes	1085	Initial examination data	56	165.1	42.2	15.5	128	83	102	72	45	0.005	yes	40.7	yes	62.45	52.6	1.19	63
Summarized Data	0	0	1	0	0	1	0	0	0	yes	yes	yes	yes	0	0	HS(-)VFA(-)	7.7	6.1	-1.6	1	20.1	19.8	-0.3	BMI≤0	0.041	0.029	-0.012	no	sufficient	yes	1163	Initial examination data	62	159.9	51.5	20.1	109	66	67	95	86	0.041	yes	70.1	yes	69.95	54.5	1.28	70.4
Summarized Data	0	0	0	0	0	0	0	0	0	yes	yes	no	no	1	1	HS(+)VFA(+)	6.1	8.9	2.8	0	23.3	23.5	0.2	0<BMI≤0.6	0.035	0.057	0.022	yes	sufficient	yes	1070	Initial examination data	60	173.4	70.1	23.3	129	80	96	119	78	0.035	yes	97.4	yes	57.1	51.15	1.12	58.1
Summarized Data	0	1	1	0	1	1	0	0	0	yes	yes	yes	yes	0	0	HS(-)VFA(-)	10.7	6.6	-4.1	1	21.7	21.4	-0.3	BMI≤0	0.025	0.026	0.001	yes	insufficient	no	733	Initial examination data	67	167.4	60.8	21.7	113	77	65	74	94	0.025	yes	16	yes	66.7	55.7	1.2	68.5
Summarized Data	0	0	0	0	1	0	0	1	0	yes	yes	yes	yes	0	0	HS(-)VFA(-)	4.8	11.5	6.7	0	24.6	23	-1.6	BMI≤0	0.07	0.019	-0.051	no	sufficient	no	772	Initial examination data	55	173.2	73.8	24.6	120	77	46	144	125	0.07	yes	52.2	yes	63.4	54	1.17	63.7
Summarized Data	1	0	1	1	0	1	0	0	0	yes	yes	yes	yes	0	0	HS(-)VFA(-)	11.8	12.5	0.7	0	20.2	19.9	-0.3	BMI≤0	0.008	0.008	0	no	insufficient	yes	307	Initial examination data	58	164.1	54.3	20.2	153	96	91	106	90	0.008	yes	79.3	yes	68.75	52.1	1.32	67.9
Summarized Data	1	0	0	1	0	1	0	0	1	yes	yes	no	yes	0	1	HS(-)VFA(+)	5	2.1	-2.9	1	23.6	24.1	0.5	0<BMI≤0.6	0.01	0.015	0.005	yes	sufficient	no	756	Initial examination data	61	170.4	68.6	23.6	141	95	54	101	109	0.01	yes	88.8	yes	62.7	53.05	1.18	65
Summarized Data	1	0	1	1	0	0	0	0	0	yes	yes	no	yes	0	1	HS(-)VFA(+)	4.7	5.2	0.5	0	22.7	22.7	0	BMI≤0	0.182	0.088	-0.094	no	insufficient	yes	707	Initial examination data	64	163.8	61	22.7	140	97	75	66	95	0.182	yes	95	yes	70.1	56.65	1.24	71.1
Summarized Data	1	0	0	1	0	0	0	0	0	yes	yes	yes	yes	0	0	HS(-)VFA(-)	21.4	17.3	-4.1	1	21.1	21.7	0.6	0<BMI≤0.6	0.02	0.008	-0.012	no	insufficient	no	1189	Initial examination data	53	178.7	67.3	21.1	142	84	55	128	86	0.02	yes	66	yes	66.25	49.65	1.33	67.1
Summarized Data	0	0	0	0	0	0	0	0	0	yes	yes	yes	yes	0	0	HS(-)VFA(-)	15.5	12.8	-2.7	1	22.4	22.7	0.3	0<BMI≤0.6	0.005	0.003	-0.002	no	sufficient	no	734	Initial examination data	58	167.5	62.9	22.4	123	79	80	97	47	0.005	yes	51.8	yes	75	56.6	1.33	75.4
Summarized Data	0	0	0	0	0	0	0	0	0	yes	yes	yes	yes	0	0	HS(-)VFA(-)	13.9	10.8	-3.1	1	21.6	20.8	-0.8	BMI≤0	0.165	0.113	-0.052	no	insufficient	no	1086	Initial examination data	51	175.6	66.7	21.6	126	74	69	110	51	0.165	yes	32.1	yes	61.05	53.05	1.15	60.9
Summarized Data	1	0	1	1	0	0	0	0	0	yes	yes	yes	yes	0	0	HS(-)VFA(-)	8.9	6	-2.9	1	24.5	24.4	-0.1	BMI≤0	0.046	0.04	-0.006	no	insufficient	yes	769	Initial examination data	54	169.7	70.6	24.5	121	81	76	105	137	0.046	yes	92.1	yes	70.3	56.25	1.25	67.5
Summarized Data	1	0	1	1	0	0	0	0	0	yes	yes	yes	yes	0	0	HS(-)VFA(-)	8.9	21.1	12.2	0	23.7	23.5	-0.2	BMI≤0	0.009	0.017	0.008	yes	sufficient	no	363	Initial examination data	53	165.8	65.2	23.7	142	97	90	113	50	0.009	yes	71.1	yes	63.75	55.35	1.15	61.5
Summarized Data	0	0	0	0	0	0	0	0	0	yes	yes	yes	yes	0	0	HS(-)VFA(-)	12	9.7	-2.3	1	24.8	25.4	0.6	0<BMI≤0.6	0.013	0.026	0.013	yes	sufficient	no	371	Initial examination data	62	167.8	69.9	24.8	103	66	80	81	41	0.013	yes	52.2	yes	63.2	57.85	1.09	61.4
Summarized Data	0	0	0	1	0	0	1	0	0	yes	yes	yes	yes	0	0	HS(-)VFA(-)	9.5	19	9.5	0	23.7	23.1	-0.6	BMI≤0	0.009	0.006	-0.003	no	insufficient	yes	1183	Initial examination data	52	167.4	66.3	23.7	128	83	73	105	69	0.009	yes	79	yes	64.2	57.4	1.12	65
Summarized Data	0	0	0	0	0	0	0	0	0	yes	yes	yes	yes	0	0	HS(-)VFA(-)	11	34	23	0	21.2	20.6	-0.6	BMI≤0	0.014	0.005	-0.009	no	sufficient	yes	397	Initial examination data	58	170.2	61.4	21.2	118	77	65	159	118	0.014	yes	54.6	yes	62.35	57	1.09	61.8
Summarized Data	0	0	1	0	0	1	0	0	0	yes	yes	yes	yes	0	0	HS(-)VFA(-)	8.6	13.8	5.2	0	20.4	20.1	-0.3	BMI≤0	0.044	0.054	0.01	yes	insufficient	yes	406	Initial examination data	66	169	58.4	20.4	114	74	81	136	73	0.044	yes	70.7	yes	63.55	55.2	1.15	64.7
Summarized Data	0	0	0	0	0	0	0	0	0	yes	yes	yes	yes	0	0	HS(-)VFA(-)	6.3	11.9	5.6	0	22.4	21.8	-0.6	BMI≤0	0.031	0.017	-0.014	no	insufficient	no	941	Initial examination data	54	171.8	66.2	22.4	120	82	44	115	113	0.031	yes	58.8	yes	64.25	50	1.29	64.9
Summarized Data	0	0	0	0	0	0	0	0	0	yes	yes	yes	yes	0	0	HS(-)VFA(-)	11.6	13.8	2.2	0	20.7	20.1	-0.6	BMI≤0	0.004	0.005	0.001	yes	insufficient	yes	979	Initial examination data	48	174.3	62.8	20.7	114	80	76	98	46	0.004	yes	51.3	yes	70.65	57.4	1.23	70.3
Summarized Data	1	0	0	1	0	0	0	0	0	yes	yes	yes	yes	0	0	HS(-)VFA(-)	9.8	9	-0.8	1	23.5	24.5	1	0.6<BMI	0.041	0.033	-0.008	no	insufficient	yes	1099	Initial examination data	54	166.1	64.7	23.5	131	87	52	129	90	0.041	yes	55.9	yes	68.35	58	1.18	69.1
Summarized Data	0	0	1	0	0	0	0	0	0	yes	yes	yes	yes	0	0	HS(-)VFA(-)	8.9	14.2	5.3	0	21.2	21.6	0.4	0<BMI≤0.6	0.007	0.005	-0.002	no	insufficient	yes	553	Initial examination data	51	173.2	63.5	21.2	118	82	87	67	53	0.007	yes	46.6	yes	67.45	54	1.25	68.6
Summarized Data	1	0	0	1	0	0	0	0	0	yes	yes	yes	yes	0	0	HS(-)VFA(-)	7.6	6.3	-1.3	1	26.1	26.5	0.4	0<BMI≤0.6	0.018	0.018	0	no	sufficient	no	434	Initial examination data	51	166.8	72.5	26.1	137	77	59	92	83	0.018	yes	80.7	yes	55.3	52.85	1.05	53.1
Summarized Data	0	0	0	0	0	0	0	0	0	yes	yes	yes	yes	0	0	HS(-)VFA(-)	4.2	5	0.8	0	23.2	23	-0.2	BMI≤0	0.005	0.005	0	no	insufficient	no	862	Initial examination data	56	173	69.4	23.2	116	75	58	112	80	0.005	yes	68.1	yes	65.65	52.95	1.24	66.2
Summarized Data	1	0	1	1	1	1	0	1	0	yes	yes	no	yes	0	1	HS(-)VFA(+)	4	5.4	1.4	0	24.8	24.9	0.1	0<BMI≤0.6	0.026	0.013	-0.013	no	insufficient	yes	1078	Initial examination data	54	172.6	73.8	24.8	135	86	81	171	108	0.026	yes	95.1	yes	65.65	52.7	1.25	66.2
Summarized Data	1	0	0	1	0	0	0	0	0	yes	yes	no	yes	0	1	HS(-)VFA(+)	11.9	8.2	-3.7	1	26.2	25.2	-1	BMI≤0	0.042	0.025	-0.017	no	sufficient	yes	1109	Initial examination data	45	176.4	81.5	26.2	128	87	44	82	76	0.042	yes	69.6	yes	61.15	56.15	1.09	58.6
Summarized Data	1	0	0	0	1	0	0	1	0	yes	yes	no	no	1	1	HS(+)VFA(+)	6.3	5.9	-0.4	1	25	24.4	-0.6	BMI≤0	0.019	0.017	-0.002	no	insufficient	no	1000	Initial examination data	54	178.4	79.7	25	134	88	48	186	116	0.019	yes	99.4	yes	65.35	53.4	1.22	64.5
Summarized Data	1	0	0	1	0	1	0	0	1	yes	yes	yes	yes	0	0	HS(-)VFA(-)	12.2	8.3	-3.9	1	19.7	19.9	0.2	0<BMI≤0.6	0.005	0.004	-0.001	no	insufficient	yes	694	Initial examination data	60	171.2	57.6	19.7	160	95	72	61	43	0.005	yes	52.8	yes	63.7	53.8	1.18	66
Summarized Data	0	0	0	0	0	0	0	0	0	yes	yes	yes	yes	0	0	HS(-)VFA(-)	15.7	10.7	-5	1	20.4	20.3	-0.1	BMI≤0	0.008	0.017	0.009	yes	sufficient	no	236	Initial examination data	49	165.7	56	20.4	93	65	57	125	127	0.008	yes	43.9	yes	72.45	55.6	1.3	72
Summarized Data	0	0	0	0	0	0	0	0	0	yes	yes	yes	yes	0	0	HS(-)VFA(-)	8.2	14.6	6.4	0	23.7	23.1	-0.6	BMI≤0	0.041	0.047	0.006	yes	insufficient	no	1162	Initial examination data	59	157.9	59.2	23.7	114	66	74	107	56	0.041	yes	36.5	yes	59.4	56.85	1.04	61.8
Summarized Data	1	0	0	1	0	0	0	0	0	yes	yes	no	yes	0	1	HS(-)VFA(+)	8.9	7.4	-1.5	1	21.7	23.2	1.5	0.6<BMI	0.015	0.009	-0.006	no	insufficient	no	1009	Initial examination data	50	177.2	68.2	21.7	171	106	61	119	100	0.015	yes	70.1	yes	70.35	51.55	1.36	71.1
Summarized Data	1	0	1	1	0	0	0	0	0	yes	yes	yes	yes	0	0	HS(-)VFA(-)	6.3	7.7	1.4	0	22.9	23	0.1	0<BMI≤0.6	0.019	0.022	0.003	yes	sufficient	no	1058	Initial examination data	50	170.1	66.4	22.9	133	85	58	95	66	0.019	yes	59.1	yes	64.4	55.2	1.17	66.1
Summarized Data	1	0	0	1	0	0	0	0	0	yes	yes	yes	yes	0	0	HS(-)VFA(-)	10.8	5.9	-4.9	1	25.4	25.6	0.2	0<BMI≤0.6	0.01	0.006	-0.004	no	insufficient	yes	1111	Initial examination data	50	165.9	69.8	25.4	130	82	67	155	71	0.01	yes	76.6	yes	66.05	55.5	1.19	64.9
Summarized Data	0	0	0	0	0	0	0	0	0	yes	yes	yes	yes	0	0	HS(-)VFA(-)	6.6	7	0.4	0	21.8	21.1	-0.7	BMI≤0	0.045	0.11	0.065	yes	insufficient	yes	1083	Initial examination data	49	177.4	68.7	21.8	125	81	62	139	115	0.045	yes	80.1	yes	56.65	51.95	1.09	61.1
Summarized Data	1	0	0	0	0	0	0	0	0	yes	yes	yes	yes	0	0	HS(-)VFA(-)	9.7	14.8	5.1	0	19.5	18.7	-0.8	BMI≤0	0.288	0.238	-0.05	no	insufficient	no	705	Initial examination data	57	175	59.7	19.5	151	95	54	129	65	0.288	yes	34.8	yes	62.8	53.8	1.17	63.5
Summarized Data	0	1	0	0	1	0	0	0	0	yes	yes	yes	yes	0	0	HS(-)VFA(-)	6.4	10.3	3.9	0	24.5	22.1	-2.4	BMI≤0	0.08	0.091	0.011	yes	insufficient	no	729	Initial examination data	49	179	78.4	24.5	100	72	55	107	113	0.08	yes	74.5	yes	70.6	50.6	1.4	67.4
Summarized Data	0	0	0	0	0	0	0	0	0	yes	yes	yes	yes	0	0	HS(-)VFA(-)	9.3	7.6	-1.7	1	23.5	23.7	0.2	0<BMI≤0.6	0.116	0.017	-0.099	no	sufficient	no	364	Initial examination data	62	177.6	74.2	23.5	114	80	47	129	124	0.116	yes	53.3	yes	70.15	55	1.28	73.6
Summarized Data	0	0	0	1	0	0	1	0	0	yes	yes	yes	yes	0	0	HS(-)VFA(-)	17	16	-1	1	24	24.4	0.4	0<BMI≤0.6	0.038	0.017	-0.021	no	sufficient	yes	1098	Initial examination data	50	165.5	65.6	24	129	81	65	104	86	0.038	yes	54.4	yes	64.4	48.05	1.34	65.3
Summarized Data	1	1	0	1	1	0	0	0	0	yes	yes	no	no	1	1	HS(+)VFA(+)	4.2	16.4	12.2	0	22.3	22.3	0	BMI≤0	0.179	0.276	0.097	yes	insufficient	yes	1074	Initial examination data	42	181.3	73.3	22.3	134	92	42	102	258	0.179	yes	98.7	yes	63.55	55	1.16	63.3
Summarized Data	0	1	0	1	1	0	1	0	0	yes	yes	yes	no	1	0	HS(+)VFA(-)	6.9	5.2	-1.7	1	19.8	20	0.2	0<BMI≤0.6	0.015	0.014	-0.001	no	insufficient	no	1170	Initial examination data	48	173.3	59.6	19.8	121	75	53	157	196	0.015	yes	40.8	yes	63.55	56.7	1.12	63.6
Summarized Data	1	0	0	1	0	0	0	0	0	yes	yes	no	yes	0	1	HS(-)VFA(+)	16.3	9.6	-6.7	1	23.8	25	1.2	0.6<BMI	0.009	0.009	0	no	sufficient	no	733	Initial examination data	57	171.3	69.7	23.8	131	86	53	72	61	0.009	yes	99.7	yes	62.9	47.75	1.32	63.9
Summarized Data	1	0	1	1	0	0	0	0	0	yes	yes	yes	yes	0	0	HS(-)VFA(-)	2.3	4.1	1.8	0	24.2	22.7	-1.5	BMI≤0	0.034	0.032	-0.002	no	insufficient	no	741	Initial examination data	62	162.8	64.2	24.2	155	98	61	99	71	0.034	yes	97.4	yes	55.5	53.9	1.03	57
Summarized Data	1	0	0	1	0	0	0	0	0	yes	yes	yes	no	1	0	HS(+)VFA(-)	10.9	11.2	0.3	0	23.1	23	-0.1	BMI≤0	0.014	0.03	0.016	yes	insufficient	yes	740	Initial examination data	58	167.2	64.5	23.1	160	102	78	82	105	0.014	yes	84.9	yes	57.35	55.15	1.04	55.4
Summarized Data	0	0	0	0	0	0	0	0	0	yes	yes	yes	yes	0	0	HS(-)VFA(-)	5.7	12.8	7.1	0	24.3	24.1	-0.2	BMI≤0	0.017	0.014	-0.003	no	insufficient	no	1121	Initial examination data	54	165.1	66.3	24.3	109	66	55	115	74	0.017	yes	76.4	yes	59.65	52.45	1.14	63.4
Summarized Data	0	0	0	0	0	0	0	0	0	yes	yes	yes	yes	0	0	HS(-)VFA(-)	6.8	4.1	-2.7	1	20.6	20.4	-0.2	BMI≤0	0.01	0.006	-0.004	no	insufficient	yes	293	Initial examination data	57	180.1	66.9	20.6	124	79	78	93	60	0.01	yes	63.5	yes	63.95	60.5	1.06	62.4
Summarized Data	0	0	1	0	0	0	0	0	0	yes	yes	yes	yes	0	0	HS(-)VFA(-)	7	5.7	-1.3	1	17.9	17.6	-0.3	BMI≤0	0.038	0.052	0.014	yes	insufficient	no	908	Initial examination data	53	166.8	49.7	17.9	117	74	75	85	74	0.038	yes	30	yes	66.35	54.85	1.21	64.9
Summarized Data	0	1	0	0	1	0	0	0	0	yes	yes	yes	yes	0	0	HS(-)VFA(-)	3.4	6.8	3.4	0	20.9	20.4	-0.5	BMI≤0	0.026	0.039	0.013	yes	sufficient	yes	1096	Initial examination data	66	159.6	53.2	20.9	127	81	59	122	79	0.026	yes	82.1	yes	65.05	57.15	1.14	66.2
Summarized Data	0	0	0	0	0	0	0	0	0	yes	yes	yes	yes	0	0	HS(-)VFA(-)	8.9	15.3	6.4	0	18.7	18.1	-0.6	BMI≤0	0.003	< 0.002	it was defined as "no"	no	sufficient	no	393	Initial examination data	49	170.2	54.3	18.7	112	73	57	103	60	0.003	yes	60.3	yes	70.95	56.65	1.25	72.5
Summarized Data	0	0	0	0	0	0	0	0	0	yes	yes	yes	yes	0	0	HS(-)VFA(-)	12	9.6	-2.4	1	21.5	21.8	0.3	0<BMI≤0.6	0.448	0.419	-0.029	no	sufficient	no	1022	Initial examination data	60	166.6	59.6	21.5	115	72	42	122	84	0.448	yes	59.2	yes	68	49.25	1.38	70.6
Summarized Data	0	0	0	0	0	0	0	0	0	yes	yes	yes	yes	0	0	HS(-)VFA(-)	13.4	12.5	-0.9	1	20.8	20.7	-0.1	BMI≤0	0.033	0.02	-0.013	no	sufficient	no	1099	Initial examination data	46	177.8	65.9	20.8	121	77	80	126	63	0.033	yes	27.3	yes	67	55.75	1.2	69.4
Summarized Data	0	0	0	0	0	1	0	0	1	yes	yes	no	yes	0	1	HS(-)VFA(+)	7.1	6.1	-1	1	23.7	25.4	1.7	0.6<BMI	0.101	0.06	-0.041	no	insufficient	no	1056	Initial examination data	51	167.6	66.7	23.7	114	75	67	114	89	0.101	yes	64.4	yes	63.35	53.65	1.18	65.6
Summarized Data	1	0	1	0	0	1	0	0	0	yes	yes	yes	yes	0	0	HS(-)VFA(-)	5.8	4.9	-0.9	1	21.2	21.3	0.1	0<BMI≤0.6	0.028	0.04	0.012	yes	insufficient	no	380	Initial examination data	50	167.7	59.5	21.2	135	79	59	118	78	0.028	yes	71.7	yes	61.6	56.05	1.1	59.3
Summarized Data	0	0	0	1	0	0	1	0	0	yes	yes	yes	yes	0	0	HS(-)VFA(-)	25.5	17.9	-7.6	1	21.6	21.5	-0.1	BMI≤0	0.044	1.21	1.166	yes	insufficient	yes	434	Initial examination data	55	175.3	66.4	21.6	125	80	72	114	103	0.044	yes	44.8	yes	61.4	55.05	1.12	60.9
Summarized Data	1	0	0	1	0	0	0	0	0	yes	yes	yes	yes	0	0	HS(-)VFA(-)	4.6	12.3	7.7	0	23.4	22.8	-0.6	BMI≤0	0.025	0.386	0.361	yes	insufficient	yes	702	Initial examination data	63	171.2	68.7	23.4	127	86	73	150	111	0.025	yes	87.6	yes	62.2	54.35	1.14	62.1
Summarized Data	1	0	0	0	0	0	0	0	0	yes	yes	yes	yes	0	0	HS(-)VFA(-)	5.4	6.5	1.1	0	20.7	20.4	-0.3	BMI≤0	0.033	0.022	-0.011	no	insufficient	no	882	Initial examination data	51	169.6	59.5	20.7	133	87	54	118	46	0.033	yes	50.6	yes	56.95	56.5	1.01	58.5
Summarized Data	0	1	1	1	1	1	1	0	0	yes	yes	yes	yes	0	0	HS(-)VFA(-)	4.8	4.2	-0.6	1	25.6	26.2	0.6	0<BMI≤0.6	0.041	0.026	-0.015	no	insufficient	no	392	Initial examination data	51	176.4	79.8	25.6	104	72	49	111	155	0.041	yes	99	yes	59.55	53.55	1.11	58.3
Summarized Data	1	0	0	1	0	0	0	0	0	yes	yes	no	yes	0	1	HS(-)VFA(+)	11.9	9	-2.9	1	23.5	23.7	0.2	0<BMI≤0.6	0.029	0.274	0.245	yes	insufficient	yes	776	Initial examination data	52	158.4	59	23.5	137	97	62	136	144	0.029	yes	90.2	yes	70.3	62.7	1.12	72.3
Summarized Data	0	0	0	1	0	1	1	0	1	yes	yes	yes	yes	0	0	HS(-)VFA(-)	2	2.6	0.6	0	25.4	25.4	0	BMI≤0	0.026	0.021	-0.005	no	insufficient	yes	732	Initial examination data	51	168.9	72.6	25.4	124	78	59	127	64	0.026	yes	93.9	yes	62.45	55.2	1.13	64.1
Summarized Data	0	0	0	0	0	0	0	0	0	yes	yes	yes	yes	0	0	HS(-)VFA(-)	16.8	10.2	-6.6	1	20	20.4	0.4	0<BMI≤0.6	0.013	0.007	-0.006	no	insufficient	no	714	Initial examination data	54	170.7	58.4	20	126	79	56	155	76	0.013	yes	29.9	yes	61	56.85	1.07	59.2
Summarized Data	1	0	1	1	1	0	0	1	0	yes	yes	yes	yes	0	0	HS(-)VFA(-)	8.6	9.3	0.7	0	22.8	23	0.2	0<BMI≤0.6	0.02	0.171	0.151	yes	sufficient	no	1120	Initial examination data	56	175.9	70.6	22.8	153	91	76	147	113	0.02	yes	63.8	yes	67.2	56.95	1.18	69.9
Summarized Data	1	0	1	0	0	1	0	0	0	yes	yes	yes	yes	0	0	HS(-)VFA(-)	6.5	8.6	2.1	0	21.3	20.8	-0.5	BMI≤0	0.045	0.012	-0.033	no	insufficient	no	1007	Initial examination data	45	166	58.8	21.3	140	93	54	128	96	0.045	yes	73.4	yes	62.05	59.8	1.04	58.7
Summarized Data	0	0	0	0	0	0	0	0	0	yes	yes	yes	yes	0	0	HS(-)VFA(-)	6.7	8.3	1.6	0	22.6	22.8	0.2	0<BMI≤0.6	0.02	0.06	0.04	yes	insufficient	yes	735	Initial examination data	46	158.1	56.6	22.6	111	71	66	141	101	0.02	yes	54.9	yes	65.1	53.95	1.21	64.3
Summarized Data	0	1	0	0	1	1	0	0	1	yes	yes	yes	no	1	0	HS(+)VFA(-)	3	3.7	0.7	0	23.9	24	0.1	0<BMI≤0.6	0.083	0.091	0.008	yes	insufficient	yes	1128	Initial examination data	58	165.8	65.6	23.9	113	73	39	140	166	0.083	yes	73.9	yes	56.5	55.5	1.02	55.3
Summarized Data	1	1	0	1	0	0	0	0	0	yes	yes	yes	yes	0	0	HS(-)VFA(-)	9.5	8.4	-1.1	1	25.1	25.4	0.3	0<BMI≤0.6	0.034	0.011	-0.023	no	sufficient	no	345	Initial examination data	56	167.6	70.6	25.1	156	98	63	81	57	0.034	yes	83.8	yes	60.55	51.75	1.17	60.7
Summarized Data	0	0	0	1	0	1	1	0	1	yes	yes	yes	yes	0	0	HS(-)VFA(-)	22.3	5.6	-16.7	1	25	24.2	-0.8	BMI≤0	0.031	0.053	0.022	yes	insufficient	no	1098	Initial examination data	50	167.8	70.3	25	117	80	55	106	88	0.031	yes	84.1	yes	66.1	55.05	1.2	65.6
Summarized Data	1	0	0	1	0	0	0	0	0	yes	yes	no	yes	0	1	HS(-)VFA(+)	4.6	4.2	-0.4	1	22.7	22.4	-0.3	BMI≤0	0.092	0.81	0.718	yes	insufficient	no	1126	Initial examination data	45	169.1	64.9	22.7	139	83	58	118	86	0.092	yes	84.5	yes	62.5	53.1	1.18	65.7
Summarized Data	0	0	0	1	0	0	1	0	0	yes	yes	yes	yes	0	0	HS(-)VFA(-)	25.6	25.6	0	0	22.9	22.8	-0.1	BMI≤0	0.024	0.016	-0.008	no	sufficient	yes	1028	Initial examination data	46	177.8	72.5	22.9	125	78	60	113	53	0.024	yes	30.9	yes	65.55	51.75	1.27	67.7
Summarized Data	0	0	0	1	0	0	1	0	0	yes	yes	yes	yes	0	0	HS(-)VFA(-)	8.5	13.1	4.6	0	22	22.5	0.5	0<BMI≤0.6	0.018	0.024	0.006	yes	insufficient	yes	1086	Initial examination data	44	164.7	59.7	22	124	84	68	111	80	0.018	yes	56	yes	65.85	53.7	1.23	64.5
Summarized Data	1	0	0	1	0	0	0	0	0	yes	yes	yes	yes	0	0	HS(-)VFA(-)	11.6	6.9	-4.7	1	21.5	22.1	0.6	0<BMI≤0.6	0.009	0.017	0.008	yes	insufficient	yes	790	Initial examination data	43	160.8	55.7	21.5	144	94	65	101	63	0.009	yes	52.8	yes	60.25	56.7	1.06	58.6
Summarized Data	0	0	1	0	0	1	0	0	0	yes	yes	yes	no	1	0	HS(+)VFA(-)	6.7	4	-2.7	1	21.3	21.5	0.2	0<BMI≤0.6	0.043	0.038	-0.005	no	insufficient	no	1105	Initial examination data	45	168.9	60.9	21.3	111	73	63	129	73	0.043	yes	55.7	yes	60.65	55.7	1.09	61.8
Summarized Data	1	1	1	1	1	1	0	0	0	yes	yes	no	no	1	1	HS(+)VFA(+)	5.8	5.3	-0.5	1	22.9	24.8	1.9	0.6<BMI	0.041	0.064	0.023	yes	insufficient	no	750	Initial examination data	49	165.6	62.8	22.9	141	95	55	99	176	0.041	yes	79.5	yes	65.05	55.55	1.17	65.4
Summarized Data	0	0	0	0	0	0	0	0	0	yes	yes	yes	yes	0	0	HS(-)VFA(-)	9.2	11.7	2.5	0	21.3	22.2	0.9	0.6<BMI	0.018	0.009	-0.009	no	insufficient	no	944	Initial examination data	48	177.5	67.1	21.3	108	74	66	118	80	0.018	yes	35.3	yes	65.6	54.15	1.21	64.6
Summarized Data	0	0	1	0	0	1	0	0	0	yes	yes	yes	yes	0	0	HS(-)VFA(-)	4.5	4.7	0.2	0	22.1	22.3	0.2	0<BMI≤0.6	0.142	0.04	-0.102	no	insufficient	no	721	Initial examination data	48	170.1	63.9	22.1	104	69	54	115	122	0.142	yes	85.9	yes	59.45	53.15	1.12	62.1
Summarized Data	1	0	0	1	1	0	0	1	0	yes	yes	yes	yes	0	0	HS(-)VFA(-)	11.7	9.6	-2.1	1	23.5	25.7	2.2	0.6<BMI	0.01	0.017	0.007	yes	insufficient	yes	1085	Initial examination data	46	172.8	70.2	23.5	127	85	56	107	139	0.01	yes	51.4	yes	65.75	51.25	1.28	64.1
Summarized Data	0	0	0	0	0	0	0	0	0	yes	yes	yes	yes	0	0	HS(-)VFA(-)	21.9	26	4.1	0	19.3	19	-0.3	BMI≤0	0.007	0.004	-0.003	no	insufficient	no	736	Initial examination data	53	180.8	63.2	19.3	127	77	68	145	121	0.007	yes	20.2	yes	67.2	55.35	1.21	70.7
Summarized Data	0	0	0	0	0	0	0	0	0	yes	yes	yes	yes	0	0	HS(-)VFA(-)	19.5	17.2	-2.3	1	20.2	21	0.8	0.6<BMI	0.008	0.009	0.001	yes	insufficient	yes	1176	Initial examination data	55	176.3	62.9	20.2	106	72	93	111	34	0.008	yes	15.8	yes	65.2	54.15	1.2	64.6
Summarized Data	1	1	0	1	0	0	0	0	0	yes	yes	no	yes	0	1	HS(-)VFA(+)	5.2	5.6	0.4	0	26.1	26.8	0.7	0.6<BMI	0.168	0.03	-0.138	no	insufficient	no	757	Initial examination data	46	169	74.5	26.1	148	103	52	106	175	0.168	yes	87.9	yes	59.65	57.5	1.04	60.5
Summarized Data	0	0	0	0	0	0	0	0	0	yes	yes	yes	yes	0	0	HS(-)VFA(-)	10.4	27.7	17.3	0	17.2	17.5	0.3	0<BMI≤0.6	0.007	0.008	0.001	yes	sufficient	no	397	Initial examination data	52	178	54.4	17.2	111	71	89	149	90	0.007	yes	21.9	yes	65.25	50.9	1.28	65.7
Summarized Data	0	0	0	1	0	0	1	0	0	yes	yes	yes	yes	0	0	HS(-)VFA(-)	26.7	26.4	-0.3	1	18.4	18.6	0.2	0<BMI≤0.6	0.051	0.025	-0.026	no	sufficient	no	1086	Initial examination data	44	195.6	70.4	18.4	115	80	74	88	32	0.051	yes	21	yes	63.65	58.35	1.09	63
Summarized Data	0	0	0	0	0	0	0	0	0	yes	yes	yes	yes	0	0	HS(-)VFA(-)	9.1	10.3	1.2	0	22.7	21.6	-1.1	BMI≤0	0.03	0.025	-0.005	no	sufficient	no	1084	Initial examination data	49	177.9	71.9	22.7	110	81	88	128	68	0.03	yes	53.5	yes	61.55	54.85	1.12	61.5
Summarized Data	1	0	0	1	0	0	0	0	0	yes	yes	yes	no	1	0	HS(+)VFA(-)	7.5	7.8	0.3	0	25	25.3	0.3	0<BMI≤0.6	0.025	0.038	0.013	yes	sufficient	yes	1092	Initial examination data	52	159.9	63.9	25	153	101	98	110	137	0.025	yes	95.7	yes	71.55	54.4	1.32	72.6
Summarized Data	1	0	0	1	1	0	0	1	0	yes	yes	yes	yes	0	0	HS(-)VFA(-)	8.8	12	3.2	0	24.3	24.5	0.2	0<BMI≤0.6	0.017	0.008	-0.009	no	sufficient	no	1148	Initial examination data	46	172.9	72.6	24.3	142	94	61	89	93	0.017	yes	40.6	yes	67.6	55.6	1.22	65.4
Summarized Data	1	0	0	1	0	0	0	0	0	yes	yes	yes	yes	0	0	HS(-)VFA(-)	11.4	17.1	5.7	0	21.9	20.9	-1	BMI≤0	0.017	0.007	-0.01	no	insufficient	no	1065	Initial examination data	47	175.2	67.1	21.9	135	88	58	86	46	0.017	yes	34.4	yes	65.45	54.6	1.2	65.7
Summarized Data	1	0	0	1	1	0	0	1	0	yes	yes	yes	yes	0	0	HS(-)VFA(-)	6.1	4	-2.1	1	22.9	23.2	0.3	0<BMI≤0.6	0.056	0.025	-0.031	no	insufficient	no	1112	Initial examination data	56	168	64.5	22.9	117	83	43	183	124	0.056	yes	98.6	yes	66.45	56.6	1.17	66.7
Summarized Data	0	0	0	0	0	0	0	0	0	yes	yes	yes	yes	0	0	HS(-)VFA(-)	12.4	8.5	-3.9	1	20.7	21.2	0.5	0<BMI≤0.6	0.014	0.019	0.005	yes	sufficient	yes	1111	Initial examination data	45	165.8	56.8	20.7	103	67	58	119	63	0.014	yes	67.8	yes	64.6	56	1.15	65.5
Summarized Data	0	1	1	0	1	0	0	0	0	yes	yes	yes	yes	0	0	HS(-)VFA(-)	8.2	4.4	-3.8	1	25.6	25.3	-0.3	BMI≤0	0.02	0.013	-0.007	no	sufficient	no	945	Initial examination data	46	171.7	75.6	25.6	126	83	53	129	168	0.02	yes	40.3	yes	61.5	54.6	1.13	62.3
Summarized Data	0	0	0	0	0	0	0	0	0	yes	yes	yes	yes	0	0	HS(-)VFA(-)	16	20	4	0	22.2	22.1	-0.1	BMI≤0	0.076	0.119	0.043	yes	sufficient	no	714	Initial examination data	56	176.7	69.2	22.2	115	79	63	139	122	0.076	yes	35.5	yes	61.95	55.1	1.12	61.2
Summarized Data	0	1	0	0	0	0	0	0	0	yes	yes	no	yes	0	1	HS(-)VFA(+)	12.2	9.4	-2.8	1	20.8	21.2	0.4	0<BMI≤0.6	0.032	0.008	-0.024	no	sufficient	yes	734	Initial examination data	44	170.8	60.7	20.8	102	70	59	137	166	0.032	yes	81	yes	68.75	54.25	1.27	67.8
Summarized Data	1	0	0	1	1	1	0	1	1	yes	yes	yes	yes	0	0	HS(-)VFA(-)	5.8	3.6	-2.2	1	25	26.6	1.6	0.6<BMI	0.01	0.018	0.008	yes	insufficient	yes	1106	Initial examination data	44	178.1	79.4	25	137	82	53	83	120	0.01	yes	52.2	yes	69.85	59.85	1.17	68.7
Summarized Data	1	0	0	0	0	0	0	0	0	yes	yes	yes	yes	0	0	HS(-)VFA(-)	10.5	8	-2.5	1	20.9	20.6	-0.3	BMI≤0	0.426	0.165	-0.261	no	insufficient	yes	694	Initial examination data	56	165	56.9	20.9	129	85	75	80	93	0.426	yes	47.5	yes	63.35	52.3	1.21	66.1
Summarized Data	0	0	0	1	1	0	1	1	0	yes	yes	no	yes	0	1	HS(-)VFA(+)	12.5	10.1	-2.4	1	23.5	24.2	0.7	0.6<BMI	0.042	0.04	-0.002	no	insufficient	yes	736	Initial examination data	53	175.1	72	23.5	120	83	62	162	127	0.042	yes	99.1	yes	61.15	58.1	1.05	60.6
Summarized Data	1	0	1	1	0	1	0	0	0	yes	yes	yes	yes	0	0	HS(-)VFA(-)	3.2	3.2	0	0	24.8	24.3	-0.5	BMI≤0	0.035	0.019	-0.016	no	sufficient	yes	936	Initial examination data	68	165.5	68	24.8	155	91	48	92	108	0.035	yes	98.3	yes	61.55	50.2	1.23	61.4
Summarized Data	1	0	1	1	1	0	0	1	0	yes	yes	no	yes	0	1	HS(-)VFA(+)	2.2	5.3	3.1	0	26	27.2	1.2	0.6<BMI	0.011	0.005	-0.006	no	insufficient	no	682	Initial examination data	51	174.7	79.5	26	131	87	68	92	74	0.011	yes	91.6	yes	61.7	54.55	1.13	66.1
Summarized Data	1	0	1	1	0	1	0	0	0	yes	yes	yes	yes	0	0	HS(-)VFA(-)	4.6	5.1	0.5	0	23	23.2	0.2	0<BMI≤0.6	0.065	0.024	-0.041	no	insufficient	yes	776	Initial examination data	51	167.6	64.7	23	137	90	65	105	76	0.065	yes	72.6	yes	62.2	55.35	1.12	62.4
Summarized Data	0	0	1	0	0	1	0	0	0	yes	yes	yes	yes	0	0	HS(-)VFA(-)	8.5	7.6	-0.9	1	19.9	20.1	0.2	0<BMI≤0.6	0.018	0.009	-0.009	no	insufficient	no	813	Initial examination data	43	172.8	59.5	19.9	119	73	62	110	124	0.018	yes	58.4	yes	73.5	53.35	1.38	71.1
Summarized Data	0	1	1	0	1	0	0	0	0	yes	yes	yes	yes	0	0	HS(-)VFA(-)	6.5	8.3	1.8	0	19.5	19.2	-0.3	BMI≤0	0.02	0.024	0.004	yes	insufficient	yes	1135	Initial examination data	47	167	54.3	19.5	116	74	45	109	195	0.02	yes	39.3	yes	63.45	56.05	1.13	65.3
Summarized Data	1	0	0	0	0	0	0	0	0	yes	yes	yes	yes	0	0	HS(-)VFA(-)	9.2	14.5	5.3	0	20.4	20.1	-0.3	BMI≤0	0.022	0.017	-0.005	no	insufficient	no	1092	Initial examination data	43	163.7	54.6	20.4	133	85	86	109	91	0.022	yes	24.4	yes	68.95	52.85	1.3	69
Summarized Data	1	0	1	0	0	1	0	0	0	yes	yes	yes	yes	0	0	HS(-)VFA(-)	34.2	18.9	-15.3	1	19.5	20.1	0.6	0<BMI≤0.6	0.043	0.026	-0.017	no	insufficient	yes	1022	Initial examination data	61	166.5	54.1	19.5	135	83	77	83	42	0.043	yes	27.4	yes	65.5	55.2	1.19	65.6
Summarized Data	1	0	0	1	0	1	0	0	1	yes	yes	yes	yes	0	0	HS(-)VFA(-)	8.5	7.3	-1.2	1	20.6	21.3	0.7	0.6<BMI	0.032	0.057	0.025	yes	insufficient	no	721	Initial examination data	58	173.7	62.2	20.6	139	82	65	108	42	0.032	yes	25.9	yes	58.1	52.1	1.12	61
Summarized Data	0	0	1	0	0	1	0	0	0	yes	yes	yes	yes	0	0	HS(-)VFA(-)	14.7	12	-2.7	1	19.9	19.9	0	BMI≤0	0.025	0.013	-0.012	no	insufficient	no	462	Initial examination data	53	172.7	59.4	19.9	111	73	49	94	106	0.025	yes	35.7	yes	66.85	57.7	1.16	67.1
Summarized Data	0	0	0	0	1	0	0	1	0	yes	yes	yes	yes	0	0	HS(-)VFA(-)	10.1	8.3	-1.8	1	24.3	25.1	0.8	0.6<BMI	0.01	0.024	0.014	yes	insufficient	no	490	Initial examination data	54	174.6	74.1	24.3	95	67	49	140	109	0.01	yes	61.6	yes	58.8	53.55	1.1	55.2
Summarized Data	1	0	0	0	0	0	0	0	0	yes	yes	yes	yes	0	0	HS(-)VFA(-)	11	8.1	-2.9	1	21.3	21.1	-0.2	BMI≤0	0.131	0.016	-0.115	no	insufficient	no	1091	Initial examination data	42	175.9	65.9	21.3	131	79	68	82	54	0.131	yes	43.5	yes	68.4	55.3	1.24	68.3
Summarized Data	0	0	0	0	0	0	0	0	0	yes	yes	yes	yes	0	0	HS(-)VFA(-)	9.2	7.8	-1.4	1	23.6	24.7	1.1	0.6<BMI	0.012	0.012	0	no	sufficient	no	1105	Initial examination data	48	180.1	76.6	23.6	127	79	57	97	88	0.012	yes	38.3	yes	59.35	56.9	1.04	59.3
Summarized Data	0	0	0	0	0	1	0	0	1	yes	yes	yes	yes	0	0	HS(-)VFA(-)	8.8	12.8	4	0	19.6	19.9	0.3	0<BMI≤0.6	0.014	0.027	0.013	yes	insufficient	yes	1085	Initial examination data	49	164.3	52.8	19.6	104	71	67	104	49	0.014	yes	36.1	yes	69.6	57.05	1.22	70.9
Summarized Data	0	0	0	0	0	0	0	0	0	yes	yes	yes	yes	0	0	HS(-)VFA(-)	8.2	10.4	2.2	0	19	19.8	0.8	0.6<BMI	0.02	0.064	0.044	yes	insufficient	yes	897	Initial examination data	43	172.2	56.3	19	116	76	69	93	56	0.02	yes	28.9	yes	68.9	56.4	1.22	68.6
Summarized Data	1	0	0	1	0	0	0	0	0	yes	yes	yes	yes	0	0	HS(-)VFA(-)	7.5	9.7	2.2	0	23.3	25	1.7	0.6<BMI	0.109	0.02	-0.089	no	sufficient	yes	752	Initial examination data	57	166.1	64.3	23.3	143	90	53	111	80	0.109	yes	54.7	yes	62.9	56.55	1.11	59.7
Summarized Data	0	0	0	0	0	0	0	0	0	yes	yes	yes	yes	0	0	HS(-)VFA(-)	7.3	13.4	6.1	0	25.9	25	-0.9	BMI≤0	0.015	0.009	-0.006	no	insufficient	no	1155	Initial examination data	44	171.8	76.3	25.9	119	76	72	108	75	0.015	yes	40.9	yes	69.3	51.5	1.35	69.2
Summarized Data	0	0	0	0	0	0	0	0	0	yes	yes	yes	no	1	0	HS(+)VFA(-)	9.6	13.9	4.3	0	24.2	22.9	-1.3	BMI≤0	0.01	0.026	0.016	yes	sufficient	yes	1244	Initial examination data	44	170.2	70.2	24.2	111	68	82	95	59	0.01	yes	72.4	yes	62.45	52.9	1.18	64.9
Summarized Data	0	0	0	0	1	0	0	1	0	yes	yes	yes	yes	0	0	HS(-)VFA(-)	7.2	7.6	0.4	0	22.4	21.7	-0.7	BMI≤0	0.022	0.017	-0.005	no	insufficient	yes	581	Initial examination data	54	170.2	65	22.4	120	75	56	131	140	0.022	yes	95.9	yes	67.9	54.2	1.25	65.9
Summarized Data	1	0	0	0	0	0	0	0	0	yes	yes	yes	yes	0	0	HS(-)VFA(-)	9	10.5	1.5	0	20.1	20.8	0.7	0.6<BMI	0.248	0.017	-0.231	no	sufficient	yes	693	Initial examination data	48	166.5	55.7	20.1	131	83	75	83	55	0.248	yes	56.2	yes	66.85	56.85	1.18	66.8
Summarized Data	1	1	0	1	1	0	0	0	0	yes	yes	yes	yes	0	0	HS(-)VFA(-)	5.5	8.7	3.2	0	21.7	21.7	0	BMI≤0	0.089	0.074	-0.015	no	insufficient	yes	1099	Initial examination data	51	171	63.5	21.7	138	88	77	140	150	0.089	yes	84.9	yes	66.65	55.45	1.2	66
Summarized Data	0	0	0	0	0	0	0	0	0	yes	yes	yes	yes	0	0	HS(-)VFA(-)	7.2	9.6	2.4	0	25.2	24	-1.2	BMI≤0	0.093	0.134	0.041	yes	sufficient	yes	372	Initial examination data	50	167.6	70.7	25.2	108	68	61	100	76	0.093	yes	50.9	yes	54.5	50.45	1.08	55.3
Summarized Data	1	0	1	0	0	0	0	0	0	yes	yes	yes	yes	0	0	HS(-)VFA(-)	5.8	18.6	12.8	0	21.7	21.5	-0.2	BMI≤0	0.043	0.029	-0.014	no	sufficient	yes	364	Initial examination data	59	160.7	56.1	21.7	132	81	50	128	76	0.043	yes	95	yes	64.2	50.7	1.27	66
Summarized Data	1	0	0	1	0	0	0	0	0	yes	yes	yes	yes	0	0	HS(-)VFA(-)	9.1	6.5	-2.6	1	23.1	23	-0.1	BMI≤0	0.006	0.013	0.007	yes	insufficient	no	455	Initial examination data	45	172.6	68.7	23.1	128	86	77	109	63	0.006	yes	50	yes	62.25	56.75	1.1	62.7
Summarized Data	0	1	1	0	1	0	0	0	0	yes	yes	yes	yes	0	0	HS(-)VFA(-)	4	6.4	2.4	0	23.5	23.9	0.4	0<BMI≤0.6	0.052	0.01	-0.042	no	insufficient	no	1137	Initial examination data	50	170.9	68.6	23.5	127	78	70	136	99	0.052	yes	80.9	yes	62.15	59.9	1.04	58.8
Summarized Data	0	0	0	1	0	0	1	0	0	yes	yes	yes	yes	0	0	HS(-)VFA(-)	14.8	11.4	-3.4	1	22	21.9	-0.1	BMI≤0	0.005	0.008	0.003	yes	insufficient	no	238	Initial examination data	43	169.1	62.8	22	126	76	67	145	84	0.005	yes	39.6	yes	66	50.75	1.3	66.6
Summarized Data	0	0	0	0	0	0	0	0	0	yes	yes	yes	yes	0	0	HS(-)VFA(-)	19.8	12.6	-7.2	1	20.9	21	0.1	0<BMI≤0.6	0.014	0.014	0	no	insufficient	no	337	Initial examination data	55	175.8	64.7	20.9	128	82	64	126	118	0.014	yes	43.6	yes	71.85	49.35	1.46	70.6
Summarized Data	1	0	0	1	0	0	0	0	0	yes	yes	yes	yes	0	0	HS(-)VFA(-)	7.3	8	0.7	0	23.7	24.5	0.8	0.6<BMI	0.007	0.009	0.002	yes	insufficient	yes	505	Initial examination data	45	170.5	68.8	23.7	119	73	66	52	52	0.007	yes	48.3	yes	65.2	56.95	1.14	66.5
Summarized Data	0	0	0	0	0	0	0	0	0	yes	yes	yes	yes	0	0	HS(-)VFA(-)	4.7	9	4.3	0	22.9	22.1	-0.8	BMI≤0	0.219	0.117	-0.102	no	insufficient	no	376	Initial examination data	42	169.9	66.1	22.9	114	72	42	110	103	0.219	yes	59.4	yes	62.15	57.4	1.08	65.3
Summarized Data	0	1	1	0	0	1	0	0	0	yes	yes	yes	yes	0	0	HS(-)VFA(-)	4.8	6.4	1.6	0	22.2	22.3	0.1	0<BMI≤0.6	0.173	0.149	-0.024	no	insufficient	no	1113	Initial examination data	44	179.3	71.4	22.2	122	73	39	78	203	0.173	yes	75	yes	67.45	53.3	1.27	68.5
Summarized Data	0	0	0	0	0	0	0	0	0	yes	yes	yes	yes	0	0	HS(-)VFA(-)	10.7	10.4	-0.3	1	22.4	21.7	-0.7	BMI≤0	0.021	0.01	-0.011	no	insufficient	no	1051	Initial examination data	42	180.7	73	22.4	107	73	51	116	54	0.021	yes	42.7	yes	61.3	55.85	1.1	62.5
Summarized Data	0	1	1	0	1	1	0	0	0	yes	yes	yes	yes	0	0	HS(-)VFA(-)	6.3	6.3	0	0	18.6	19.2	0.6	0<BMI≤0.6	0.036	0.019	-0.017	no	sufficient	no	459	Initial examination data	47	170.8	54.3	18.6	108	62	57	175	121	0.036	yes	63.5	yes	59.35	53.4	1.11	61.6
Summarized Data	1	0	1	0	0	1	0	0	0	yes	yes	yes	yes	0	0	HS(-)VFA(-)	5.4	6.1	0.7	0	20.6	20.8	0.2	0<BMI≤0.6	0.043	0.011	-0.032	no	sufficient	yes	687	Initial examination data	67	173.9	62.4	20.6	136	81	47	91	69	0.043	yes	59.6	yes	61.3	57.1	1.07	60.4
Summarized Data	0	0	0	0	0	0	0	0	0	yes	yes	yes	yes	0	0	HS(-)VFA(-)	14.1	11.8	-2.3	1	20.2	19.8	-0.4	BMI≤0	0.003	0.006	0.003	yes	insufficient	yes	795	Initial examination data	41	182.5	67.3	20.2	114	70	74	72	44	0.003	yes	32	yes	66.55	53.65	1.24	68.2
Summarized Data	0	0	0	0	0	0	0	0	0	yes	yes	yes	yes	0	0	HS(-)VFA(-)	10.5	14.8	4.3	0	19	18.6	-0.4	BMI≤0	0.069	0.163	0.094	yes	insufficient	no	1085	Initial examination data	40	176	58.8	19	121	77	52	123	78	0.069	yes	51	yes	61.1	55.75	1.1	63.3
Summarized Data	0	0	0	0	0	0	0	0	0	yes	yes	yes	yes	0	0	HS(-)VFA(-)	14.9	22.7	7.8	0	19.9	20.9	1	0.6<BMI	0.019	0.017	-0.002	no	insufficient	yes	840	Initial examination data	41	174.5	60.7	19.9	90	57	48	98	58	0.019	yes	44	yes	66.1	54.75	1.21	67.2
Summarized Data	0	0	1	0	0	0	0	0	0	yes	yes	yes	yes	0	0	HS(-)VFA(-)	7	13.1	6.1	0	21.5	21.3	-0.2	BMI≤0	0.006	0.004	-0.002	no	insufficient	no	742	Initial examination data	52	164.2	58.1	21.5	100	65	96	145	143	0.006	yes	25.5	yes	64.7	46.05	1.4	66.4
Summarized Data	0	1	1	0	1	1	0	0	0	yes	yes	yes	yes	0	0	HS(-)VFA(-)	4.6	5.6	1	0	24.8	24.7	-0.1	BMI≤0	0.014	0.007	-0.007	no	insufficient	yes	349	Initial examination data	53	170.5	72.2	24.8	129	69	59	110	151	0.014	yes	74.5	yes	70.1	53.95	1.3	68.6
Summarized Data	0	0	0	0	0	0	0	0	0	yes	yes	yes	yes	0	0	HS(-)VFA(-)	3.6	7.1	3.5	0	23	22.1	-0.9	BMI≤0	0.025	0.024	-0.001	no	sufficient	no	1141	Initial examination data	41	169.5	66.1	23	123	74	49	121	126	0.025	yes	78.5	yes	60.75	55.55	1.09	62.2
Summarized Data	0	0	0	0	0	0	0	0	0	yes	yes	yes	yes	0	0	HS(-)VFA(-)	7.8	7.4	-0.4	1	19.1	19.8	0.7	0.6<BMI	0.007	0.009	0.002	yes	insufficient	yes	922	Initial examination data	41	178.6	61	19.1	127	79	74	103	82	0.007	yes	37.9	yes	68.15	53.65	1.27	71.3
Summarized Data	1	0	0	1	1	0	0	1	0	yes	yes	yes	yes	0	0	HS(-)VFA(-)	13.2	12.9	-0.3	1	21.8	21.3	-0.5	BMI≤0	0.077	0.457	0.38	yes	sufficient	yes	722	Initial examination data	60	164.6	59.1	21.8	121	88	69	182	61	0.077	yes	60.3	yes	71.15	55.9	1.27	71
Summarized Data	1	0	0	1	0	1	0	0	1	yes	yes	yes	yes	0	0	HS(-)VFA(-)	4.7	5.8	1.1	0	21.4	20.9	-0.5	BMI≤0	0.413	0.013	-0.4	no	insufficient	no	1060	Initial examination data	50	169.7	61.5	21.4	140	90	62	131	130	0.413	yes	29.1	yes	62.85	56.2	1.12	61.8
Summarized Data	0	0	0	1	0	0	1	0	0	yes	yes	yes	yes	0	0	HS(-)VFA(-)	9.6	15.2	5.6	0	21.5	22.4	0.9	0.6<BMI	0.01	0.013	0.003	yes	sufficient	no	376	Initial examination data	45	178.7	68.5	21.5	128	80	61	96	46	0.01	yes	36.5	yes	66.45	52.85	1.26	65.2
Summarized Data	0	0	0	0	0	0	0	0	0	yes	yes	yes	yes	0	0	HS(-)VFA(-)	16.4	11.9	-4.5	1	18.1	19.2	1.1	0.6<BMI	0.013	0.667	0.654	yes	insufficient	yes	1085	Initial examination data	44	167	50.4	18.1	128	77	83	115	73	0.013	yes	14	yes	67.95	52.25	1.3	68.1
Summarized Data	0	0	0	0	0	0	0	0	0	yes	yes	yes	yes	0	0	HS(-)VFA(-)	5.5	6	0.5	0	20.7	21.4	0.7	0.6<BMI	0.05	0.078	0.028	yes	sufficient	no	993	Initial examination data	44	168.8	58.9	20.7	117	70	58	144	94	0.05	yes	33.2	yes	64.35	55.45	1.16	62
Summarized Data	0	0	0	0	0	0	0	0	0	yes	yes	yes	yes	0	0	HS(-)VFA(-)	23	11.8	-11.2	1	22.9	23.3	0.4	0<BMI≤0.6	0.004	0.052	0.048	yes	insufficient	yes	749	Initial examination data	41	180.1	74.2	22.9	101	62	99	65	73	0.004	yes	78.5	yes	64.8	56.1	1.16	67.7
Summarized Data	0	0	0	0	0	0	0	0	0	yes	yes	yes	yes	0	0	HS(-)VFA(-)	5.1	11.5	6.4	0	20	19.4	-0.6	BMI≤0	0.02	0.025	0.005	yes	insufficient	yes	1071	Initial examination data	45	173.1	59.9	20	101	65	69	109	58	0.02	yes	63.6	yes	69.95	54.8	1.28	69.2
Summarized Data	0	0	0	1	0	0	1	0	0	yes	yes	yes	yes	0	0	HS(-)VFA(-)	15.1	7.8	-7.3	1	21	21.9	0.9	0.6<BMI	0.03	0.09	0.06	yes	sufficient	no	994	Initial examination data	60	178.6	67.1	21	112	74	54	107	62	0.03	yes	43.2	yes	61.1	53.4	1.14	60.7
Summarized Data	0	0	1	1	1	0	1	1	0	yes	yes	no	yes	0	1	HS(-)VFA(+)	5.6	6.8	1.2	0	26.3	26.8	0.5	0<BMI≤0.6	0.008	0.004	-0.004	no	insufficient	yes	1177	Initial examination data	56	170.6	76.5	26.3	127	82	54	111	92	0.008	yes	95.7	yes	66.1	56.65	1.17	65.5
Summarized Data	0	0	0	0	0	0	0	0	0	yes	yes	yes	yes	0	0	HS(-)VFA(-)	9.9	14	4.1	0	19.9	20.4	0.5	0<BMI≤0.6	0.008	0.014	0.006	yes	insufficient	no	702	Initial examination data	40	166.3	54.9	19.9	116	78	65	148	80	0.008	yes	35	yes	66.6	56.75	1.17	70
Summarized Data	0	0	0	0	0	0	0	0	0	yes	yes	yes	yes	0	0	HS(-)VFA(-)	16.5	28.2	11.7	0	21.5	21.9	0.4	0<BMI≤0.6	0.082	0.025	-0.057	no	sufficient	yes	1151	Initial examination data	42	167	59.9	21.5	124	83	57	154	90	0.082	yes	39.1	yes	67.05	51.75	1.3	67.8
Summarized Data	1	0	0	1	0	0	0	0	0	yes	yes	yes	yes	0	0	HS(-)VFA(-)	8.7	4.9	-3.8	1	21.7	22.2	0.5	0<BMI≤0.6	0.019	0.019	0	no	sufficient	yes	405	Initial examination data	54	171.8	64.1	21.7	144	96	54	146	132	0.019	yes	88.9	yes	66.45	56.1	1.18	67.8
Summarized Data	0	0	0	0	0	0	0	0	0	yes	yes	yes	yes	0	0	HS(-)VFA(-)	12.2	22.6	10.4	0	21.9	21.8	-0.1	BMI≤0	0.097	0.238	0.141	yes	insufficient	yes	730	Initial examination data	47	175.3	67.3	21.9	106	69	72	129	71	0.097	yes	77.9	yes	66.3	50.35	1.32	66.2
Summarized Data	0	0	0	0	0	0	0	0	0	yes	yes	yes	yes	0	0	HS(-)VFA(-)	20.8	16.8	-4	1	21.4	20	-1.4	BMI≤0	0.026	0.066	0.04	yes	sufficient	yes	1092	Initial examination data	44	176.8	66.8	21.4	115	68	47	118	87	0.026	yes	32.6	yes	64.5	55.05	1.17	65.4
Summarized Data	0	1	0	0	1	0	0	0	0	yes	yes	no	yes	0	1	HS(-)VFA(+)	11.6	20.7	9.1	0	20.9	21.1	0.2	0<BMI≤0.6	0.054	0.065	0.011	yes	insufficient	yes	721	Initial examination data	41	170.2	60.6	20.9	117	74	45	108	230	0.054	yes	88.8	yes	60.15	55.85	1.08	59.4
Summarized Data	0	0	0	0	0	0	0	0	0	yes	yes	yes	yes	0	0	HS(-)VFA(-)	14.5	15.2	0.7	0	18	17.7	-0.3	BMI≤0	0.016	0.027	0.011	yes	sufficient	yes	911	Initial examination data	63	160.9	46.5	18	101	70	76	81	62	0.016	yes	28.4	yes	68.45	58.75	1.17	68.4
Summarized Data	0	0	0	0	0	0	0	0	0	yes	yes	yes	yes	0	0	HS(-)VFA(-)	7.8	11.1	3.3	0	20.8	20.7	-0.1	BMI≤0	0.02	0.017	-0.003	no	insufficient	no	650	Initial examination data	41	175	63.7	20.8	123	74	56	112	142	0.02	yes	46.8	yes	64.7	49.1	1.32	63
Summarized Data	0	0	0	0	0	1	0	0	1	yes	yes	yes	yes	0	0	HS(-)VFA(-)	11.4	9.9	-1.5	1	23	21.7	-1.3	BMI≤0	0.018	0.011	-0.007	no	sufficient	no	595	Initial examination data	41	172.6	68.5	23	115	74	48	89	53	0.018	yes	63.8	yes	64.4	51.9	1.24	63.6
Summarized Data	0	1	0	0	1	0	0	0	0	yes	yes	yes	yes	0	0	HS(-)VFA(-)	16.9	10.3	-6.6	1	22.1	21.1	-1	BMI≤0	0.006	0.006	0	no	insufficient	yes	762	Initial examination data	41	181.5	72.9	22.1	125	77	73	129	161	0.006	yes	93.2	yes	66.5	58.2	1.14	64.2
Summarized Data	1	0	1	0	0	1	0	0	0	yes	yes	yes	yes	0	0	HS(-)VFA(-)	14	6.3	-7.7	1	18.1	18.3	0.2	0<BMI≤0.6	0.018	0.01	-0.008	no	insufficient	yes	1092	Initial examination data	46	165	49.4	18.1	145	85	60	128	76	0.018	yes	27.1	yes	67.45	55.95	1.21	66.9
Summarized Data	1	0	0	0	0	0	0	0	0	yes	yes	yes	yes	0	0	HS(-)VFA(-)	15.3	19.9	4.6	0	21.6	21.5	-0.1	BMI≤0	0.017	0.009	-0.008	no	sufficient	no	1073	Initial examination data	44	166.2	59.6	21.6	133	84	55	88	92	0.017	yes	42.2	yes	62.7	57.3	1.09	64.4
Summarized Data	0	1	1	0	1	0	0	0	0	yes	yes	yes	yes	0	0	HS(-)VFA(-)	9.8	8.8	-1	1	22.7	22.8	0.1	0<BMI≤0.6	0.009	0.013	0.004	yes	insufficient	yes	735	Initial examination data	47	168.3	64.2	22.7	119	81	63	90	169	0.009	yes	64.4	yes	67.3	53.3	1.26	65.6
Summarized Data	0	0	0	0	0	0	0	0	0	yes	yes	no	yes	0	1	HS(-)VFA(+)	9	9.8	0.8	0	22.1	22.4	0.3	0<BMI≤0.6	0.034	0.112	0.078	yes	insufficient	yes	1092	Initial examination data	48	175.9	68.3	22.1	102	71	62	150	102	0.034	yes	63.4	yes	67.5	53.15	1.27	69.5
Summarized Data	1	0	0	1	0	0	0	0	0	yes	yes	yes	yes	0	0	HS(-)VFA(-)	10.8	14	3.2	0	22.4	23	0.6	0<BMI≤0.6	0.011	0.027	0.016	yes	sufficient	no	1149	Initial examination data	46	172.6	66.7	22.4	141	97	83	133	45	0.011	yes	11.5	yes	68.45	55.75	1.23	67.7
Summarized Data	1	1	0	0	1	0	0	0	0	yes	yes	yes	yes	0	0	HS(-)VFA(-)	9.2	10.3	1.1	0	21	20.7	-0.3	BMI≤0	0.027	0.034	0.007	yes	sufficient	yes	1212	Initial examination data	56	173.2	63.1	21	138	73	71	106	106	0.027	yes	94	yes	72.65	56	1.3	73
Summarized Data	0	0	0	1	0	0	1	0	0	yes	yes	yes	yes	0	0	HS(-)VFA(-)	10.7	8.4	-2.3	1	22.7	22.2	-0.5	BMI≤0	0.013	0.01	-0.003	no	insufficient	yes	724	Initial examination data	56	166.9	63.3	22.7	126	80	53	111	105	0.013	yes	54.8	yes	65.65	51.25	1.28	64.7
Summarized Data	0	0	0	0	0	0	0	0	0	yes	yes	yes	yes	0	0	HS(-)VFA(-)	10.9	7.3	-3.6	1	19.9	20.8	0.9	0.6<BMI	0.07	0.009	-0.061	no	sufficient	no	370	Initial examination data	43	170.4	57.8	19.9	102	63	63	101	85	0.07	yes	21.4	yes	69.15	52.7	1.31	67.7
Summarized Data	0	1	0	1	1	0	1	0	0	yes	yes	yes	yes	0	0	HS(-)VFA(-)	7.3	8.9	1.6	0	23.8	24.1	0.3	0<BMI≤0.6	0.065	0.043	-0.022	no	insufficient	no	741	Initial examination data	45	169.8	68.6	23.8	127	80	44	109	204	0.065	yes	84.9	yes	61.5	55.75	1.1	64
Summarized Data	0	1	1	0	1	0	0	0	0	yes	yes	yes	yes	0	0	HS(-)VFA(-)	6.7	7.2	0.5	0	23.2	23.7	0.5	0<BMI≤0.6	0.11	0.162	0.052	yes	sufficient	yes	1092	Initial examination data	57	168.8	66	23.2	115	74	55	99	61	0.11	yes	80.3	yes	65.2	57.35	1.14	64.1
Summarized Data	0	0	0	0	1	0	0	1	0	yes	yes	yes	yes	0	0	HS(-)VFA(-)	9.5	12.3	2.8	0	22.1	22	-0.1	BMI≤0	0.391	0.342	-0.049	no	insufficient	no	1092	Initial examination data	53	164.6	59.8	22.1	110	69	42	113	80	0.391	yes	96	yes	64.15	52.65	1.22	64.1
Summarized Data	0	0	0	0	0	0	0	0	0	yes	yes	yes	yes	0	0	HS(-)VFA(-)	16.1	9.3	-6.8	1	23.1	23.3	0.2	0<BMI≤0.6	0.007	0.013	0.006	yes	insufficient	no	377	Initial examination data	41	175.9	71.4	23.1	101	67	49	98	117	0.007	yes	76.7	yes	68.1	54.35	1.25	69.7
Summarized Data	1	0	0	1	0	0	0	0	0	yes	yes	yes	yes	0	0	HS(-)VFA(-)	23.3	14.6	-8.7	1	23.2	23.5	0.3	0<BMI≤0.6	0.121	0.015	-0.106	no	insufficient	yes	267	Initial examination data	45	188	82	23.2	152	105	79	81	41	0.121	yes	43.3	yes	62.5	52.5	1.19	63.2
Summarized Data	0	0	1	1	0	0	1	0	0	yes	yes	yes	yes	0	0	HS(-)VFA(-)	7.4	9.1	1.7	0	25.2	25.5	0.3	0<BMI≤0.6	0.04	0.016	-0.024	no	insufficient	no	383	Initial examination data	41	167.8	70.9	25.2	122	79	48	136	89	0.04	yes	79.3	yes	64.4	57.2	1.13	65.6
Summarized Data	1	1	0	1	1	0	0	0	0	yes	yes	yes	yes	0	0	HS(-)VFA(-)	16.3	20.5	4.2	0	22.1	23.1	1	0.6<BMI	0.127	0.058	-0.069	no	sufficient	no	1147	Initial examination data	57	171.6	65.2	22.1	139	85	34	74	167	0.127	yes	97.6	yes	59.95	57.4	1.04	62
Summarized Data	0	0	0	0	0	0	0	0	0	yes	yes	yes	yes	0	0	HS(-)VFA(-)	8	10.1	2.1	0	21.1	22.2	1.1	0.6<BMI	0.009	0.004	-0.005	no	insufficient	no	1073	Initial examination data	46	177.9	66.7	21.1	119	75	65	120	75	0.009	yes	53.6	yes	64.65	58.95	1.1	66.4
Summarized Data	1	0	1	1	0	1	0	0	0	yes	yes	yes	yes	0	0	HS(-)VFA(-)	5.3	5	-0.3	1	21.6	20.8	-0.8	BMI≤0	0.013	0.023	0.01	yes	sufficient	no	336	Initial examination data	59	175.9	66.7	21.6	140	87	63	113	58	0.013	yes	65.9	yes	65.35	56	1.17	67.1
Summarized Data	0	0	0	0	0	0	0	0	0	yes	yes	yes	yes	0	0	HS(-)VFA(-)	7.8	6.5	-1.3	1	22.7	22.6	-0.1	BMI≤0	0.034	0.019	-0.015	no	insufficient	no	399	Initial examination data	44	180.5	74.1	22.7	116	77	42	101	59	0.034	yes	72.4	yes	57.15	49.3	1.16	58.3
Summarized Data	1	0	0	1	0	0	0	0	0	yes	yes	no	yes	0	1	HS(-)VFA(+)	15.2	14	-1.2	1	26	26.4	0.4	0<BMI≤0.6	0.058	0.11	0.052	yes	sufficient	yes	378	Initial examination data	57	170.8	75.9	26	135	98	70	126	83	0.058	yes	74.3	yes	59.7	50.2	1.19	56.5
Summarized Data	0	0	1	0	0	0	0	0	0	yes	yes	yes	yes	0	0	HS(-)VFA(-)	10	14.5	4.5	0	23.7	22.6	-1.1	BMI≤0	0.38	0.009	-0.371	no	sufficient	yes	1076	Initial examination data	55	162.3	62.3	23.7	125	84	72	118	66	0.38	yes	62.6	yes	61.9	50.15	1.23	62.9
Summarized Data	0	0	0	0	0	0	0	0	0	yes	yes	yes	yes	0	0	HS(-)VFA(-)	14.7	11.8	-2.9	1	20.2	19.8	-0.4	BMI≤0	0.02	0.057	0.037	yes	insufficient	no	673	Initial examination data	45	178.9	64.8	20.2	109	71	70	114	104	0.02	yes	38.7	yes	69.5	53.5	1.3	72.4
Summarized Data	1	0	0	1	0	0	0	0	0	yes	yes	yes	yes	0	0	HS(-)VFA(-)	7.9	9.1	1.2	0	21.4	20.8	-0.6	BMI≤0	0.165	0.05	-0.115	no	sufficient	no	373	Initial examination data	44	169.5	61.6	21.4	133	82	67	148	61	0.165	yes	55	yes	60.75	54.35	1.12	60
Summarized Data	0	1	1	0	1	1	0	0	0	yes	yes	yes	no	1	0	HS(+)VFA(-)	4.8	4.5	-0.3	1	26.8	27.8	1	0.6<BMI	0.046	0.26	0.214	yes	insufficient	yes	1114	Initial examination data	45	170.5	77.8	26.8	116	78	46	110	198	0.046	yes	74.7	yes	58.85	57.4	1.03	59.2
Summarized Data	1	0	1	1	0	1	0	0	0	yes	yes	yes	yes	0	0	HS(-)VFA(-)	10.4	11.9	1.5	0	23	22.6	-0.4	BMI≤0	0.106	0.017	-0.089	no	sufficient	yes	1107	Initial examination data	55	169.4	65.9	23	149	95	59	116	83	0.106	yes	86.3	yes	65.5	51.2	1.28	67.5
Summarized Data	0	1	1	1	1	1	1	0	0	yes	yes	yes	yes	0	0	HS(-)VFA(-)	2.9	5.2	2.3	0	24.1	23.7	-0.4	BMI≤0	0.026	0.027	0.001	yes	sufficient	no	719	Initial examination data	62	168.3	68.3	24.1	128	81	43	98	169	0.026	yes	68.7	yes	61.65	58.3	1.06	60.4
Summarized Data	0	1	1	0	1	0	0	0	0	yes	yes	yes	no	1	0	HS(+)VFA(-)	2.3	4.4	2.1	0	23.3	22.4	-0.9	BMI≤0	0.251	0.013	-0.238	no	insufficient	no	315	Initial examination data	42	183.5	78.4	23.3	126	77	40	99	237	0.251	yes	95	yes	56.3	54.55	1.03	55.5
Summarized Data	0	1	0	1	0	0	1	0	0	yes	yes	no	no	1	1	HS(+)VFA(+)	5.9	6.7	0.8	0	25.4	26.2	0.8	0.6<BMI	0.027	0.033	0.006	yes	insufficient	no	365	Initial examination data	43	164.1	68.5	25.4	120	80	42	157	167	0.027	yes	95.3	yes	57.6	55.85	1.03	61.8
Summarized Data	0	0	0	0	0	0	0	0	0	yes	yes	yes	yes	0	0	HS(-)VFA(-)	9.7	9.7	0	0	20.8	21.1	0.3	0<BMI≤0.6	0.012	0.006	-0.006	no	sufficient	no	742	Initial examination data	43	174.7	63.6	20.8	116	78	70	77	48	0.012	yes	27.8	yes	71.75	56.5	1.27	73.3
Summarized Data	1	1	0	1	0	0	0	0	0	yes	yes	yes	yes	0	0	HS(-)VFA(-)	2.7	8.2	5.5	0	27.3	24.3	-3	BMI≤0	0.091	0.221	0.13	yes	sufficient	no	730	Initial examination data	44	180.5	89	27.3	169	114	46	48	469	0.091	yes	83.2	yes	64.95	53.95	1.2	65.1
Summarized Data	1	0	0	1	0	0	0	0	0	yes	yes	yes	yes	0	0	HS(-)VFA(-)	13.1	13.3	0.2	0	22.2	22.1	-0.1	BMI≤0	0.022	0.005	-0.017	no	sufficient	yes	369	Initial examination data	54	180.5	72.2	22.2	126	83	96	57	35	0.022	yes	91.1	yes	62.9	55.8	1.13	62.7
Summarized Data	1	0	0	0	0	0	0	0	0	yes	yes	yes	yes	0	0	HS(-)VFA(-)	6.6	8.4	1.8	0	21.7	21.7	0	BMI≤0	0.018	0.021	0.003	yes	sufficient	no	726	Initial examination data	44	169.8	62.6	21.7	132	86	48	114	110	0.018	yes	68.5	yes	62.45	60	1.04	62.6
Summarized Data	1	0	0	1	1	0	0	1	0	yes	yes	yes	yes	0	0	HS(-)VFA(-)	9	5.8	-3.2	1	22.9	24	1.1	0.6<BMI	0.051	0.032	-0.019	no	insufficient	no	742	Initial examination data	59	172	67.8	22.9	136	87	60	149	134	0.051	yes	81.3	yes	70.15	49.5	1.42	66.7
Summarized Data	0	0	0	0	0	0	0	0	0	yes	yes	yes	yes	0	0	HS(-)VFA(-)	8.2	7	-1.2	1	21.9	22.2	0.3	0<BMI≤0.6	0.009	0.018	0.009	yes	insufficient	no	1036	Initial examination data	46	161.5	57.1	21.9	98	66	53	113	75	0.009	yes	34.9	yes	64.9	52.15	1.24	64.9
Summarized Data	1	0	0	0	0	0	0	0	0	yes	yes	yes	yes	0	0	HS(-)VFA(-)	3.5	5.1	1.6	0	21.2	20.5	-0.7	BMI≤0	0.007	0.009	0.002	yes	sufficient	yes	351	Initial examination data	47	172.7	63.2	21.2	134	84	70	118	55	0.007	yes	54.7	yes	67.35	55.8	1.21	67.2
Summarized Data	0	0	0	0	0	0	0	0	0	yes	yes	yes	yes	0	0	HS(-)VFA(-)	8.5	13.6	5.1	0	18.1	18.2	0.1	0<BMI≤0.6	0.022	0.009	-0.013	no	insufficient	no	1141	Initial examination data	44	174.8	55.3	18.1	100	67	58	128	65	0.022	yes	50.3	yes	63.5	55.95	1.13	62.8
Summarized Data	1	0	1	1	0	1	0	0	0	yes	yes	no	yes	0	1	HS(-)VFA(+)	3.4	3.5	0.1	0	25.1	26.5	1.4	0.6<BMI	0.091	0.084	-0.007	no	sufficient	yes	1099	Initial examination data	57	162.4	66.3	25.1	132	85	68	101	67	0.091	yes	91.3	yes	66.15	52	1.27	68.6
Summarized Data	0	0	1	1	0	1	1	0	0	yes	yes	yes	yes	0	0	HS(-)VFA(-)	5.8	6.8	1	0	25.5	25.6	0.1	0<BMI≤0.6	0.021	0.022	0.001	yes	insufficient	no	826	Initial examination data	56	154.4	60.7	25.5	126	84	45	108	72	0.021	yes	55.1	yes	65.8	52.4	1.26	65.9
Summarized Data	0	1	0	1	1	1	1	0	1	yes	yes	no	no	1	1	HS(+)VFA(+)	6	2.9	-3.1	1	26.4	29.8	3.4	0.6<BMI	0.078	0.111	0.033	yes	insufficient	no	1098	Initial examination data	42	174.4	80.2	26.4	127	80	79	143	166	0.078	yes	82.1	yes	59.6	48.3	1.23	59.9
Summarized Data	0	0	0	0	0	0	0	0	0	yes	yes	yes	yes	0	0	HS(-)VFA(-)	11.3	6.8	-4.5	1	20.4	23	2.6	0.6<BMI	0.006	0.021	0.015	yes	insufficient	yes	1154	Initial examination data	43	167.2	56.9	20.4	106	71	47	116	50	0.006	yes	55.7	yes	63.95	52.2	1.23	64.6
Summarized Data	0	0	0	0	0	0	0	0	0	yes	yes	yes	yes	0	0	HS(-)VFA(-)	11.7	12.5	0.8	0	21.2	22.6	1.4	0.6<BMI	0.014	0.02	0.006	yes	sufficient	no	1171	Initial examination data	42	180.7	69.3	21.2	110	77	44	90	102	0.014	yes	69.6	yes	66.3	52.45	1.26	67.6
Summarized Data	0	0	0	0	0	0	0	0	0	yes	yes	no	no	1	1	HS(+)VFA(+)	5.2	3.3	-1.9	1	21.9	22.8	0.9	0.6<BMI	0.044	0.068	0.024	yes	insufficient	yes	1119	Initial examination data	43	181.2	71.9	21.9	118	76	45	95	94	0.044	yes	71.7	yes	62.5	55.3	1.13	61.3
Summarized Data	1	0	0	1	0	0	0	0	0	yes	yes	yes	yes	0	0	HS(-)VFA(-)	8.8	9.5	0.7	0	21.7	21.5	-0.2	BMI≤0	0.03	0.027	-0.003	no	sufficient	no	364	Initial examination data	64	161.6	56.6	21.7	136	90	75	100	49	0.03	yes	60.8	yes	62.6	53.65	1.17	61.7
Summarized Data	0	0	0	0	0	0	0	0	0	yes	yes	yes	yes	0	0	HS(-)VFA(-)	9.2	14.1	4.9	0	22.5	22.6	0.1	0<BMI≤0.6	0.022	0.11	0.088	yes	insufficient	yes	414	Initial examination data	48	179.3	72.2	22.5	117	75	85	86	114	0.022	yes	91.5	yes	65.45	55.35	1.18	63.5
Summarized Data	1	0	1	1	0	0	0	0	0	yes	yes	yes	yes	0	0	HS(-)VFA(-)	3.6	6	2.4	0	20.3	19.7	-0.6	BMI≤0	0.018	0.009	-0.009	no	insufficient	yes	1064	Initial examination data	44	164.8	55.1	20.3	148	95	82	96	71	0.018	yes	76.2	yes	59.9	49.95	1.2	61.2
Summarized Data	0	0	0	0	0	0	0	0	0	yes	yes	yes	yes	0	0	HS(-)VFA(-)	12.9	12.2	-0.7	1	21.8	22.2	0.4	0<BMI≤0.6	0.014	0.015	0.001	yes	sufficient	no	357	Initial examination data	48	164	58.7	21.8	111	68	53	167	91	0.014	yes	27.7	yes	70.4	57.75	1.22	71
Summarized Data	0	0	1	1	1	1	1	1	0	yes	yes	no	yes	0	1	HS(-)VFA(+)	11.1	5.7	-5.4	1	20	22.7	2.7	0.6<BMI	0.037	0.116	0.079	yes	insufficient	yes	798	Initial examination data	48	177.2	62.9	20	109	74	70	66	103	0.037	yes	71.4	yes	58.5	53.7	1.09	61.5
Summarized Data	0	0	1	0	0	1	0	0	0	yes	yes	yes	yes	0	0	HS(-)VFA(-)	6.7	4.6	-2.1	1	26	26.4	0.4	0<BMI≤0.6	0.013	0.009	-0.004	no	insufficient	no	1093	Initial examination data	42	184.8	88.7	26	122	80	83	115	44	0.013	yes	49.6	yes	61.85	55.1	1.12	62.2
Summarized Data	0	0	0	0	0	0	0	0	0	yes	yes	yes	yes	0	0	HS(-)VFA(-)	6.5	8	1.5	0	20.3	20	-0.3	BMI≤0	0.008	0.004	-0.004	no	insufficient	no	1116	Initial examination data	40	165.6	55.8	20.3	124	66	73	139	118	0.008	yes	37.1	yes	73.65	59	1.25	72.1
Summarized Data	0	1	0	0	0	0	0	0	0	yes	yes	yes	yes	0	0	HS(-)VFA(-)	5.9	14.3	8.4	0	23	21.8	-1.2	BMI≤0	0.011	0.007	-0.004	no	sufficient	yes	1042	Initial examination data	49	171.1	67.4	23	123	78	37	139	151	0.011	yes	93.4	yes	68.85	55.65	1.24	72.4
Summarized Data	1	0	0	1	0	0	0	0	0	yes	yes	yes	yes	0	0	HS(-)VFA(-)	12.1	12.6	0.5	0	20	19.1	-0.9	BMI≤0	0.011	0.005	-0.006	no	insufficient	no	1086	Initial examination data	52	177.7	63.3	20	151	94	75	117	44	0.011	yes	51.3	yes	63.2	55.35	1.14	63.4
Summarized Data	1	0	0	1	0	1	0	0	1	yes	yes	no	yes	0	1	HS(-)VFA(+)	7.6	7.5	-0.1	1	23.4	24.8	1.4	0.6<BMI	0.049	0.061	0.012	yes	sufficient	yes	1129	Initial examination data	50	171.1	68.6	23.4	134	87	61	105	77	0.049	yes	96.6	yes	63.2	50.1	1.26	63.7
Summarized Data	1	0	0	0	0	0	0	0	0	yes	yes	no	yes	0	1	HS(-)VFA(+)	8.9	5.4	-3.5	1	24.6	25.5	0.9	0.6<BMI	0.049	0.086	0.037	yes	sufficient	yes	389	Initial examination data	41	178.5	78.5	24.6	136	80	42	112	66	0.049	yes	85.9	yes	69.4	51.4	1.35	67
Summarized Data	1	0	1	1	0	1	0	0	0	yes	yes	no	yes	0	1	HS(-)VFA(+)	10.6	6.3	-4.3	1	23.1	23.3	0.2	0<BMI≤0.6	0.041	0.059	0.018	yes	sufficient	yes	396	Initial examination data	62	174.5	70.3	23.1	160	107	57	91	56	0.041	yes	82.8	yes	64.8	51.2	1.27	63.6
Summarized Data	0	0	0	0	0	0	0	0	0	yes	yes	yes	yes	0	0	HS(-)VFA(-)	13.2	23.4	10.2	0	17.6	17.1	-0.5	BMI≤0	0.021	0.426	0.405	yes	insufficient	yes	813	Initial examination data	50	173.1	52.8	17.6	106	71	83	77	62	0.021	yes	16.5	yes	66.15	54.3	1.22	66.8
Summarized Data	0	1	0	0	1	0	0	0	0	yes	yes	yes	yes	0	0	HS(-)VFA(-)	5.3	4.5	-0.8	1	24.2	24.4	0.2	0<BMI≤0.6	0.013	0.02	0.007	yes	insufficient	no	1029	Initial examination data	46	172	71.6	24.2	116	77	54	131	180	0.013	yes	74.5	yes	70.75	54.4	1.3	71.9
Summarized Data	1	0	0	1	0	0	0	0	0	yes	yes	yes	yes	0	0	HS(-)VFA(-)	5.5	4.4	-1.1	1	23.5	23.2	-0.3	BMI≤0	0.057	0.012	-0.045	no	insufficient	no	1092	Initial examination data	52	164.2	63.3	23.5	128	90	57	113	71	0.057	yes	94	yes	61.75	52.65	1.17	62.9
Summarized Data	0	0	1	0	0	1	0	0	0	yes	yes	yes	yes	0	0	HS(-)VFA(-)	3.3	6.1	2.8	0	21.1	21	-0.1	BMI≤0	0.041	0.026	-0.015	no	insufficient	no	1063	Initial examination data	51	164.2	56.8	21.1	105	70	42	71	148	0.041	yes	71.5	yes	59.6	52.8	1.13	61
Summarized Data	0	0	0	0	0	0	0	0	0	yes	yes	yes	yes	0	0	HS(-)VFA(-)	5.9	7.4	1.5	0	20.3	20.4	0.1	0<BMI≤0.6	0.003	< 0.002	it was defined as "no"	no	insufficient	yes	492	Initial examination data	41	172.5	60.4	20.3	108	70	76	79	48	0.003	yes	30	yes	64.25	57.45	1.12	62.8
Summarized Data	0	0	0	0	0	0	0	0	0	yes	yes	yes	yes	0	0	HS(-)VFA(-)	9.5	12	2.5	0	20.3	19.5	-0.8	BMI≤0	0.012	0.021	0.009	yes	insufficient	yes	1104	Initial examination data	42	170.5	58.9	20.3	106	68	63	54	49	0.012	yes	36	yes	64.95	53.5	1.21	65.6
Summarized Data	0	0	0	0	0	0	0	0	0	yes	yes	yes	yes	0	0	HS(-)VFA(-)	11.1	12.1	1	0	21.3	21.9	0.6	0<BMI≤0.6	0.005	0.004	-0.001	no	sufficient	no	1100	Initial examination data	58	174.2	64.6	21.3	122	80	68	138	85	0.005	yes	55.9	yes	64.3	54.15	1.19	65.6
Summarized Data	1	0	0	1	1	0	0	1	0	yes	yes	yes	yes	0	0	HS(-)VFA(-)	5.7	8.1	2.4	0	25	26	1	0.6<BMI	0.455	0.031	-0.424	no	insufficient	no	1099	Initial examination data	51	171.7	73.8	25	133	80	57	115	123	0.455	yes	71.4	yes	58.85	53.4	1.1	57.4
Summarized Data	1	0	0	1	0	1	0	0	1	yes	yes	yes	yes	0	0	HS(-)VFA(-)	4.8	6.3	1.5	0	24	23.6	-0.4	BMI≤0	0.011	0.011	0	no	sufficient	no	357	Initial examination data	58	165.5	65.6	24	153	95	72	112	74	0.011	yes	74.5	yes	61.15	53.2	1.15	61.6
Summarized Data	0	0	0	0	0	0	0	0	0	yes	yes	yes	yes	0	0	HS(-)VFA(-)	11.5	11.2	-0.3	1	24.2	23.9	-0.3	BMI≤0	0.014	0.015	0.001	yes	insufficient	no	1078	Initial examination data	49	169.7	69.8	24.2	106	61	74	104	102	0.014	yes	70.6	yes	65.4	52.5	1.25	66.7
Summarized Data	1	0	0	1	0	0	0	0	0	yes	yes	yes	yes	0	0	HS(-)VFA(-)	7	11.8	4.8	0	20.3	20	-0.3	BMI≤0	0.061	0.039	-0.022	no	insufficient	no	1140	Initial examination data	43	169	58.1	20.3	130	88	47	128	111	0.061	yes	79.1	yes	64.95	53	1.23	65.5
Summarized Data	0	0	0	0	0	1	0	0	1	yes	yes	yes	no	1	0	HS(+)VFA(-)	4.5	3.6	-0.9	1	23.6	24.9	1.3	0.6<BMI	0.032	0.306	0.274	yes	insufficient	no	357	Initial examination data	46	176.4	73.3	23.6	124	84	56	134	98	0.032	yes	70.8	yes	65.8	56.6	1.16	66.9
Summarized Data	0	0	0	0	0	0	0	0	0	yes	yes	yes	yes	0	0	HS(-)VFA(-)	7.1	6.7	-0.4	1	21.9	21.7	-0.2	BMI≤0	0.182	0.121	-0.061	no	insufficient	no	727	Initial examination data	44	173.7	66.1	21.9	111	71	52	102	69	0.182	yes	92.4	yes	56.55	56.2	1.01	56.3
Summarized Data	0	1	0	0	0	0	0	0	0	yes	yes	yes	yes	0	0	HS(-)VFA(-)	7.3	6.5	-0.8	1	20.6	19.9	-0.7	BMI≤0	0.03	0.042	0.012	yes	insufficient	no	755	Initial examination data	58	165.9	56.8	20.6	110	78	44	121	159	0.03	yes	41.9	yes	66.65	57.6	1.16	65.2
Summarized Data	0	0	0	0	0	0	0	0	0	yes	yes	yes	yes	0	0	HS(-)VFA(-)	21.8	27	5.2	0	19.6	19.9	0.3	0<BMI≤0.6	0.002	0.006	0.004	yes	insufficient	yes	378	Initial examination data	41	166.4	54.4	19.6	88	59	78	50	23	0.002	yes	31.1	yes	67.75	57.1	1.19	69.8
Summarized Data	0	1	0	1	1	0	1	0	0	yes	yes	yes	yes	0	0	HS(-)VFA(-)	9.5	13.1	3.6	0	23.6	24.6	1	0.6<BMI	0.032	0.059	0.027	yes	insufficient	no	1218	Initial examination data	43	169.2	67.5	23.6	128	76	41	79	163	0.032	yes	83.4	yes	62.3	51.75	1.2	59.6
Summarized Data	1	0	1	0	0	0	0	0	0	yes	yes	yes	yes	0	0	HS(-)VFA(-)	4.8	10.8	6	0	23.2	22.4	-0.8	BMI≤0	0.02	0.009	-0.011	no	sufficient	no	1053	Initial examination data	45	165.8	63.7	23.2	129	88	58	116	131	0.02	yes	58.2	yes	65.9	55.45	1.19	65.8
Summarized Data	1	0	0	0	0	0	0	0	0	yes	yes	yes	yes	0	0	HS(-)VFA(-)	22.6	15.8	-6.8	1	22.5	22.7	0.2	0<BMI≤0.6	0.027	0.051	0.024	yes	sufficient	yes	441	Initial examination data	52	172.4	67	22.5	135	88	52	104	90	0.027	yes	85.9	yes	64.95	55.7	1.17	65.5
Summarized Data	0	0	0	0	0	0	0	0	0	yes	yes	yes	yes	0	0	HS(-)VFA(-)	11.5	6.8	-4.7	1	24.3	24.2	-0.1	BMI≤0	0.117	0.158	0.041	yes	sufficient	no	481	Initial examination data	45	180.6	79.3	24.3	120	69	60	133	77	0.117	yes	90.8	yes	65.4	55.45	1.18	65
Summarized Data	1	1	1	1	1	1	0	0	0	yes	yes	yes	yes	0	0	HS(-)VFA(-)	5.3	2.7	-2.6	1	21.8	21.6	-0.2	BMI≤0	0.058	0.013	-0.045	no	sufficient	no	735	Initial examination data	69	167.8	61.3	21.8	141	87	42	118	183	0.058	yes	92	yes	60.25	56.1	1.07	58.5
Summarized Data	0	0	1	0	0	0	0	0	0	yes	yes	yes	yes	0	0	HS(-)VFA(-)	4.5	6.8	2.3	0	23.4	23	-0.4	BMI≤0	0.009	0.003	-0.006	no	insufficient	no	311	Initial examination data	40	165.9	64.4	23.4	116	59	49	156	129	0.009	yes	91.7	yes	56.75	53.75	1.06	56.3
Summarized Data	1	0	0	0	0	0	0	0	0	yes	yes	yes	yes	0	0	HS(-)VFA(-)	9	10	1	0	20.8	19.7	-1.1	BMI≤0	0.05	0.054	0.004	yes	insufficient	no	1050	Initial examination data	61	164.6	56.3	20.8	133	80	85	110	60	0.05	yes	58.7	yes	67.3	53.15	1.27	68.4
Summarized Data	1	0	0	0	0	0	0	0	0	yes	yes	yes	yes	0	0	HS(-)VFA(-)	7.7	6.5	-1.2	1	22.5	22.8	0.3	0<BMI≤0.6	0.039	0.028	-0.011	no	insufficient	no	721	Initial examination data	50	177.8	71.1	22.5	133	76	56	118	104	0.039	yes	61.1	yes	66.1	54.3	1.22	63.3
Summarized Data	1	0	1	1	0	1	0	0	0	yes	yes	yes	yes	0	0	HS(-)VFA(-)	8.4	4.8	-3.6	1	20.5	20.7	0.2	0<BMI≤0.6	0.102	0.035	-0.067	no	insufficient	no	720	Initial examination data	62	165.9	56.3	20.5	131	90	57	138	84	0.102	yes	38.4	yes	70.15	54.1	1.3	69.7
Summarized Data	0	1	0	0	0	0	0	0	0	yes	yes	yes	yes	0	0	HS(-)VFA(-)	9.7	7.5	-2.2	1	20.7	20.3	-0.4	BMI≤0	0.028	0.009	-0.019	no	insufficient	no	358	Initial examination data	58	168.8	59	20.7	123	74	33	103	68	0.028	yes	70.9	yes	57.5	54	1.06	60.5
Summarized Data	1	0	0	1	1	0	0	1	0	yes	yes	yes	yes	0	0	HS(-)VFA(-)	5.5	2.6	-2.9	1	26.4	26.2	-0.2	BMI≤0	0.855	0.021	-0.834	no	insufficient	no	369	Initial examination data	44	174.1	80.1	26.4	172	117	47	157	131	0.855	yes	77.1	yes	59.75	55.05	1.09	58.9
Summarized Data	1	0	0	1	0	0	0	0	0	yes	yes	yes	yes	0	0	HS(-)VFA(-)	20.3	16.5	-3.8	1	20.3	20.2	-0.1	BMI≤0	0.036	0.026	-0.01	no	sufficient	no	1104	Initial examination data	57	160.8	52.6	20.3	154	94	63	136	86	0.036	yes	41.9	yes	64.9	56.75	1.14	65.6
Summarized Data	1	0	0	1	0	0	0	0	0	yes	yes	yes	yes	0	0	HS(-)VFA(-)	13.6	9.9	-3.7	1	21.8	22.1	0.3	0<BMI≤0.6	0.01	0.015	0.005	yes	insufficient	no	1100	Initial examination data	53	170.8	63.7	21.8	146	94	76	142	52	0.01	yes	53.3	yes	64.4	57.4	1.12	65.7
Summarized Data	0	0	0	0	0	0	0	0	0	yes	yes	yes	yes	0	0	HS(-)VFA(-)	19.7	15.2	-4.5	1	19.8	21.1	1.3	0.6<BMI	1.54	0.003	-1.537	no	insufficient	yes	357	Initial examination data	40	171.1	57.9	19.8	101	64	73	83	55	1.54	yes	28.3	yes	66.65	55.7	1.2	69.2
Summarized Data	0	0	0	0	0	0	0	0	0	yes	yes	yes	yes	0	0	HS(-)VFA(-)	5.5	5.9	0.4	0	19.5	19.9	0.4	0<BMI≤0.6	0.014	0.005	-0.009	no	insufficient	no	286	Initial examination data	41	177.4	61.3	19.5	119	78	62	99	29	0.014	yes	49.3	yes	65.2	56.75	1.15	66.2
Summarized Data	0	0	0	0	0	0	0	0	0	yes	yes	yes	yes	0	0	HS(-)VFA(-)	10.7	11.7	1	0	23.4	22.6	-0.8	BMI≤0	0.018	0.021	0.003	yes	insufficient	yes	373	Initial examination data	45	174.9	71.7	23.4	118	83	60	165	61	0.018	yes	67.4	yes	63.15	55.5	1.14	64.2
Summarized Data	1	0	0	1	0	0	0	0	0	yes	yes	yes	yes	0	0	HS(-)VFA(-)	7.5	7.6	0.1	0	18.9	19.1	0.2	0<BMI≤0.6	0.008	0.011	0.003	yes	sufficient	no	377	Initial examination data	47	170.1	54.6	18.9	131	87	79	124	57	0.008	yes	51.7	yes	74	60.7	1.22	74.9
Summarized Data	0	1	0	0	0	0	0	0	0	yes	yes	yes	yes	0	0	HS(-)VFA(-)	7.7	9	1.3	0	23	22.9	-0.1	BMI≤0	0.05	0.019	-0.031	no	insufficient	yes	1119	Initial examination data	47	160.4	59.2	23	119	76	39	121	105	0.05	yes	66.2	yes	65.4	54	1.21	64.8
Summarized Data	1	0	0	1	0	0	0	0	0	yes	yes	yes	yes	0	0	HS(-)VFA(-)	9.2	59.9	50.7	0	22	22.2	0.2	0<BMI≤0.6	0.015	0.068	0.053	yes	sufficient	yes	736	Initial examination data	50	162.6	58.2	22	157	98	85	59	70	0.015	yes	50.2	yes	71.65	50.85	1.41	76.5
Summarized Data	0	0	1	0	0	0	0	0	0	yes	yes	yes	yes	0	0	HS(-)VFA(-)	4.7	6.6	1.9	0	20.2	21.5	1.3	0.6<BMI	0.09	0.132	0.042	yes	insufficient	no	1106	Initial examination data	46	174.7	61.7	20.2	124	83	54	93	79	0.09	yes	37.2	yes	65.1	55.2	1.18	65.9
Summarized Data	1	0	0	1	0	0	0	0	0	yes	yes	yes	yes	0	0	HS(-)VFA(-)	10.7	12.9	2.2	0	24	22.9	-1.1	BMI≤0	0.023	0.029	0.006	yes	sufficient	no	1098	Initial examination data	56	168.2	68	24	137	87	55	121	107	0.023	yes	56.7	yes	66.55	56.65	1.17	66.1
Summarized Data	0	0	0	0	0	0	0	0	0	yes	yes	yes	yes	0	0	HS(-)VFA(-)	6	8.5	2.5	0	25.3	25.1	-0.2	BMI≤0	0.084	0.044	-0.04	no	sufficient	yes	966	Initial examination data	46	171.7	74.5	25.3	116	78	50	108	93	0.084	yes	94.4	yes	68.7	55.65	1.23	69.9
Summarized Data	0	0	0	0	0	0	0	0	0	yes	yes	yes	yes	0	0	HS(-)VFA(-)	10.3	17.2	6.9	0	24.4	24	-0.4	BMI≤0	0.003	0.003	0	no	insufficient	no	517	Initial examination data	43	175.5	75.2	24.4	116	73	60	121	101	0.003	yes	75.1	yes	67.45	53.6	1.26	65.3
Summarized Data	1	0	0	1	0	0	0	0	0	yes	yes	yes	yes	0	0	HS(-)VFA(-)	9.6	13.5	3.9	0	25.5	25.8	0.3	0<BMI≤0.6	0.014	0.007	-0.007	no	sufficient	yes	1094	Initial examination data	47	167.5	71.5	25.5	146	97	71	133	110	0.014	yes	97.3	yes	68.3	56.6	1.21	70.1
Summarized Data	0	0	0	0	0	0	0	0	0	yes	yes	yes	yes	0	0	HS(-)VFA(-)	7.6	16.4	8.8	0	20.5	20.5	0	BMI≤0	0.059	0.021	-0.038	no	insufficient	no	791	Initial examination data	41	171.1	60.1	20.5	128	80	74	116	64	0.059	yes	29.6	yes	70.3	56	1.26	72.1
Summarized Data	1	0	0	1	0	0	0	0	0	yes	yes	yes	yes	0	0	HS(-)VFA(-)	9.6	7.8	-1.8	1	21	20.7	-0.3	BMI≤0	0.028	0.013	-0.015	no	sufficient	yes	1113	Initial examination data	47	173.8	63.3	21	136	83	94	149	130	0.028	yes	61.6	yes	69.5	54.85	1.27	67.4
Summarized Data	0	0	0	0	0	0	0	0	0	yes	yes	yes	yes	0	0	HS(-)VFA(-)	10.7	14.3	3.6	0	21.6	21.1	-0.5	BMI≤0	0.009	0.009	0	no	insufficient	no	1077	Initial examination data	44	181.1	70.8	21.6	108	71	59	93	49	0.009	yes	38.5	yes	66.35	53.25	1.25	67.3
Summarized Data	1	0	0	1	0	0	0	0	0	yes	yes	yes	yes	0	0	HS(-)VFA(-)	8.7	8.4	-0.3	1	21.8	22.9	1.1	0.6<BMI	0.039	0.04	0.001	yes	insufficient	yes	1139	Initial examination data	48	169.1	62.3	21.8	140	88	59	97	74	0.039	yes	44.4	yes	63.5	57.35	1.11	63.6
Summarized Data	0	1	0	0	0	0	0	0	0	yes	yes	yes	yes	0	0	HS(-)VFA(-)	6.7	5.2	-1.5	1	21.4	21.5	0.1	0<BMI≤0.6	0.033	0.019	-0.014	no	sufficient	no	1113	Initial examination data	47	160.3	54.9	21.4	104	71	61	143	160	0.033	yes	75.1	yes	63.8	56.65	1.13	61.5
Summarized Data	0	0	0	0	0	0	0	0	0	yes	yes	yes	yes	0	0	HS(-)VFA(-)	5	13.1	8.1	0	23.2	20.8	-2.4	BMI≤0	0.052	0.007	-0.045	no	sufficient	no	836	Initial examination data	41	165.4	63.4	23.2	106	63	65	109	104	0.052	yes	64.7	yes	63.75	59.1	1.08	63.6
Summarized Data	0	0	0	0	0	0	0	0	0	yes	yes	yes	yes	0	0	HS(-)VFA(-)	10.2	8.8	-1.4	1	21	21	0	BMI≤0	0.016	0.009	-0.007	no	insufficient	no	687	Initial examination data	51	170.2	60.7	21	110	71	59	122	41	0.016	yes	54.5	yes	56.9	56.6	1.01	56.5
Summarized Data	1	0	0	1	0	0	0	0	0	yes	yes	yes	yes	0	0	HS(-)VFA(-)	10.2	18.2	8	0	21.7	21.9	0.2	0<BMI≤0.6	0.317	0.009	-0.308	no	sufficient	no	1093	Initial examination data	48	167.2	60.7	21.7	155	96	70	100	41	0.317	yes	48.1	yes	66.1	53.4	1.24	65.2
Summarized Data	1	0	0	1	0	0	0	0	0	yes	yes	yes	yes	0	0	HS(-)VFA(-)	9.8	12.5	2.7	0	20.6	19.9	-0.7	BMI≤0	0.006	0.004	-0.002	no	insufficient	yes	730	Initial examination data	50	173.9	62.4	20.6	144	93	69	128	86	0.006	yes	86.6	yes	69.55	57.75	1.2	71.9
Summarized Data	0	0	0	0	1	0	0	1	0	yes	yes	yes	yes	0	0	HS(-)VFA(-)	14.3	11.6	-2.7	1	24.1	25.5	1.4	0.6<BMI	0.025	0.039	0.014	yes	insufficient	yes	840	Initial examination data	42	169.7	69.4	24.1	108	73	49	139	81	0.025	yes	56.6	yes	67.95	55.75	1.22	69.7
Summarized Data	0	1	0	0	1	0	0	0	0	yes	yes	yes	yes	0	0	HS(-)VFA(-)	6.7	7.4	0.7	0	22.3	23.6	1.3	0.6<BMI	0.013	0.015	0.002	yes	insufficient	no	1085	Initial examination data	55	183.7	75.2	22.3	107	77	28	42	268	0.013	yes	51	yes	59.75	52.95	1.13	60.2
Summarized Data	0	0	0	0	1	1	0	1	1	yes	yes	yes	yes	0	0	HS(-)VFA(-)	11.5	5.5	-6	1	18.3	20	1.7	0.6<BMI	0.008	0.024	0.016	yes	insufficient	no	1093	Initial examination data	44	164.6	49.7	18.3	97	65	53	156	70	0.008	yes	32.1	yes	64.8	56.35	1.15	65.5
Summarized Data	0	1	1	0	1	1	0	0	0	yes	yes	yes	no	1	0	HS(+)VFA(-)	8.2	8.8	0.6	0	26.4	26.6	0.2	0<BMI≤0.6	0.021	0.019	-0.002	no	sufficient	no	1004	Initial examination data	53	169.9	76.3	26.4	121	81	44	67	232	0.021	yes	68.8	yes	62.65	56.35	1.11	62.7
Summarized Data	0	0	0	0	0	0	0	0	0	yes	yes	yes	yes	0	0	HS(-)VFA(-)	16.3	14.3	-2	1	18.6	18.7	0.1	0<BMI≤0.6	0.008	0.006	-0.002	no	insufficient	yes	1108	Initial examination data	47	171.3	54.7	18.6	104	72	86	83	55	0.008	yes	22.2	yes	61.5	55.5	1.11	62
Summarized Data	1	1	0	0	0	0	0	0	0	yes	yes	yes	yes	0	0	HS(-)VFA(-)	9.8	6.4	-3.4	1	21.3	21.6	0.3	0<BMI≤0.6	0.074	0.097	0.023	yes	sufficient	yes	1106	Initial examination data	49	173.5	64.1	21.3	134	84	50	86	152	0.074	yes	54.1	yes	66.05	55.3	1.19	66.9
Summarized Data	0	0	1	1	1	1	1	1	0	yes	yes	yes	yes	0	0	HS(-)VFA(-)	4.5	2.4	-2.1	1	25.4	25.6	0.2	0<BMI≤0.6	0.022	0.072	0.05	yes	insufficient	yes	810	Initial examination data	45	166	69.9	25.4	122	80	48	97	145	0.022	yes	79.1	yes	71.35	56.1	1.27	69.8
Summarized Data	1	0	0	0	0	1	0	0	1	yes	yes	yes	yes	0	0	HS(-)VFA(-)	7.2	5.7	-1.5	1	21.8	20	-1.8	BMI≤0	0.011	0.006	-0.005	no	sufficient	yes	665	Initial examination data	48	176.7	68.1	21.8	138	88	70	111	58	0.011	yes	48.5	yes	61.75	53.15	1.16	62.7
Summarized Data	0	0	0	0	0	0	0	0	0	yes	yes	yes	yes	0	0	HS(-)VFA(-)	6.8	16.8	10	0	21.9	21.1	-0.8	BMI≤0	0.007	0.012	0.005	yes	sufficient	no	1030	Initial examination data	52	177.8	69.2	21.9	105	70	54	149	133	0.007	yes	60.2	yes	64.55	52.65	1.23	65.6
Summarized Data	0	0	0	0	0	0	0	0	0	yes	yes	yes	yes	0	0	HS(-)VFA(-)	11.5	10.2	-1.3	1	19.6	19.2	-0.4	BMI≤0	0.009	0.01	0.001	yes	insufficient	no	729	Initial examination data	42	176	60.6	19.6	104	80	54	111	69	0.009	yes	39.6	yes	66.95	54.25	1.23	68.3
Summarized Data	0	1	0	0	0	0	0	0	0	yes	yes	yes	yes	0	0	HS(-)VFA(-)	7.1	4	-3.1	1	24.3	24.7	0.4	0<BMI≤0.6	0.022	0.026	0.004	yes	sufficient	no	733	Initial examination data	45	178.3	77.1	24.3	111	67	54	127	154	0.022	yes	70.7	yes	58.1	55.7	1.04	58.8
Summarized Data	1	0	0	1	0	0	0	0	0	yes	yes	yes	yes	0	0	HS(-)VFA(-)	7.2	10.4	3.2	0	23.7	22.9	-0.8	BMI≤0	0.019	0.092	0.073	yes	insufficient	no	1083	Initial examination data	50	165	64.4	23.7	139	98	55	132	99	0.019	yes	88.2	yes	70.3	54	1.3	70.3
Summarized Data	1	0	1	1	0	0	0	0	0	yes	yes	yes	yes	0	0	HS(-)VFA(-)	10.6	9	-1.6	1	21.6	21.5	-0.1	BMI≤0	0.039	0.041	0.002	yes	sufficient	no	315	Initial examination data	72	167.8	60.8	21.6	144	88	61	153	68	0.039	yes	97.9	yes	66.55	52.35	1.27	66.3
Summarized Data	0	0	0	0	0	0	0	0	0	yes	yes	yes	yes	0	0	HS(-)VFA(-)	12.1	13.9	1.8	0	21	22	1	0.6<BMI	0.005	0.01	0.005	yes	sufficient	no	246	Initial examination data	46	178	66.4	21	118	76	61	89	70	0.005	yes	43.8	yes	63.15	56.8	1.11	64.6
Summarized Data	0	1	0	0	1	0	0	0	0	yes	yes	no	yes	0	1	HS(-)VFA(+)	4	6.7	2.7	0	26.9	30.7	3.8	0.6<BMI	0.585	0.145	-0.44	no	insufficient	yes	1282	Initial examination data	48	174.1	81.6	26.9	96	62	33	70	160	0.585	yes	79.2	yes	58	56.3	1.03	58.6
Summarized Data	1	1	1	1	1	1	0	0	0	yes	yes	no	no	1	1	HS(+)VFA(+)	2.8	1.9	-0.9	1	27.9	31.5	3.6	0.6<BMI	0.117	0.859	0.742	yes	sufficient	no	1100	Initial examination data	49	169.9	80.5	27.9	139	97	57	122	353	0.117	yes	99.9	yes	55.45	54.15	1.02	55.6
Summarized Data	0	0	0	0	0	0	0	0	0	yes	yes	yes	yes	0	0	HS(-)VFA(-)	7.3	12.2	4.9	0	22.7	23.6	0.9	0.6<BMI	0.018	0.017	-0.001	no	sufficient	yes	441	Initial examination data	55	161.2	58.9	22.7	122	84	58	63	102	0.018	yes	55.6	yes	67.85	55.25	1.23	67.1
Summarized Data	1	0	0	0	0	0	0	0	0	yes	yes	yes	yes	0	0	HS(-)VFA(-)	12.5	21.6	9.1	0	18.2	17.2	-1	BMI≤0	0.004	0.002	-0.002	no	insufficient	no	729	Initial examination data	58	180.9	59.7	18.2	125	85	93	70	61	0.004	yes	42.8	yes	67.35	51.3	1.31	69.8
Summarized Data	1	1	0	1	1	0	0	0	0	yes	yes	yes	yes	0	0	HS(-)VFA(-)	13.8	8.8	-5	1	22.3	24.1	1.8	0.6<BMI	0.009	0.092	0.083	yes	sufficient	yes	805	Initial examination data	68	165.7	61.2	22.3	117	80	91	81	42	0.009	yes	71.4	yes	69.05	57.05	1.21	68.1
Summarized Data	1	1	0	0	0	0	0	0	0	yes	yes	yes	yes	0	0	HS(-)VFA(-)	10.5	15.6	5.1	0	26	24.7	-1.3	BMI≤0	0.025	0.07	0.045	yes	insufficient	no	791	Initial examination data	46	176.4	80.8	26	125	89	55	128	158	0.025	yes	72.5	yes	64.35	54.6	1.18	66
Summarized Data	1	0	1	0	0	0	0	0	0	yes	yes	yes	no	1	0	HS(+)VFA(-)	4	16	12	0	19.5	20.8	1.3	0.6<BMI	1.04	0.014	-1.026	no	insufficient	yes	728	Initial examination data	45	170.8	57	19.5	139	89	113	66	26	1.04	yes	25.4	yes	55.6	49.05	1.13	56.3
Summarized Data	1	0	1	1	0	1	0	0	0	yes	yes	yes	yes	0	0	HS(-)VFA(-)	11.5	25.5	14	0	23.9	23.3	-0.6	BMI≤0	0.005	0.004	-0.001	no	sufficient	no	285	Initial examination data	61	157.4	59.3	23.9	141	91	71	146	102	0.005	yes	55.7	yes	64.95	51.6	1.26	65
Summarized Data	0	0	0	0	0	0	0	0	0	yes	yes	yes	yes	0	0	HS(-)VFA(-)	3.9	5.1	1.2	0	23.9	23.9	0	BMI≤0	0.021	0.013	-0.008	no	sufficient	no	733	Initial examination data	54	169.3	68.6	23.9	121	78	59	146	74	0.021	yes	94.2	yes	59.6	55.95	1.07	60.6
Summarized Data	0	1	1	0	0	0	0	0	0	yes	yes	yes	yes	0	0	HS(-)VFA(-)	13.3	13.7	0.4	0	25.2	24	-1.2	BMI≤0	0.048	0.043	-0.005	no	insufficient	yes	365	Initial examination data	43	174.4	76.5	25.2	108	66	39	146	130	0.048	yes	37.2	yes	66.25	55.85	1.19	70.2
Summarized Data	1	1	0	1	1	0	0	0	0	yes	yes	yes	yes	0	0	HS(-)VFA(-)	2.6	3.6	1	0	24.3	24.5	0.2	0<BMI≤0.6	0.037	0.026	-0.011	no	sufficient	yes	336	Initial examination data	48	169.4	69.8	24.3	127	85	57	159	170	0.037	yes	81.3	yes	65.2	48.5	1.34	68
Summarized Data	0	1	1	1	1	0	1	0	0	yes	yes	no	yes	0	1	HS(-)VFA(+)	2.4	5.2	2.8	0	23.5	23.6	0.1	0<BMI≤0.6	0.015	0.011	-0.004	no	sufficient	no	364	Initial examination data	53	166.2	64.9	23.5	118	81	59	119	177	0.015	yes	90.9	yes	57.65	56.1	1.03	55.6
Summarized Data	0	0	0	0	0	0	0	0	0	yes	yes	yes	yes	0	0	HS(-)VFA(-)	12.5	16.3	3.8	0	22.3	22.3	0	BMI≤0	0.013	0.008	-0.005	no	sufficient	yes	371	Initial examination data	53	168.8	63.5	22.3	114	74	67	138	47	0.013	yes	81.1	yes	67.1	55.2	1.22	68.2
Summarized Data	1	1	1	1	1	1	0	0	0	yes	yes	yes	yes	0	0	HS(-)VFA(-)	3.4	3.4	0	0	20.6	19.9	-0.7	BMI≤0	0.051	0.028	-0.023	no	insufficient	no	1039	Initial examination data	49	179.4	66.4	20.6	135	80	48	158	173	0.051	yes	96.9	yes	63.7	56.4	1.13	61.5
Summarized Data	0	0	0	0	0	0	0	0	0	yes	yes	yes	yes	0	0	HS(-)VFA(-)	4.4	7.5	3.1	0	21.2	21.9	0.7	0.6<BMI	0.006	0.005	-0.001	no	insufficient	no	1064	Initial examination data	49	169.3	60.8	21.2	112	78	62	114	56	0.006	yes	41.4	yes	60.2	56.9	1.06	59.8
Summarized Data	1	0	0	1	0	0	0	0	0	yes	yes	yes	yes	0	0	HS(-)VFA(-)	6	11.7	5.7	0	22.4	22.7	0.3	0<BMI≤0.6	0.017	0.012	-0.005	no	sufficient	no	679	Initial examination data	51	167.8	63.1	22.4	135	82	66	108	85	0.017	yes	60.8	yes	67.6	54.75	1.23	70.1
Summarized Data	0	0	0	1	0	0	1	0	0	yes	yes	yes	yes	0	0	HS(-)VFA(-)	10.8	7.7	-3.1	1	21.1	20.7	-0.4	BMI≤0	0.018	0.025	0.007	yes	sufficient	no	1085	Initial examination data	50	174.9	64.4	21.1	117	80	44	145	47	0.018	yes	51.8	yes	68.1	54.15	1.26	69.2
Summarized Data	0	1	0	0	1	1	0	0	1	yes	yes	no	yes	0	1	HS(-)VFA(+)	4.1	4.2	0.1	0	21	23	2	0.6<BMI	0.024	0.038	0.014	yes	sufficient	no	1071	Initial examination data	45	174.1	63.7	21	119	77	59	120	102	0.024	yes	59.6	yes	70.75	56.75	1.25	68.2
Summarized Data	0	1	1	0	1	0	0	0	0	yes	yes	yes	yes	0	0	HS(-)VFA(-)	4.8	9	4.2	0	23.3	23.9	0.6	0<BMI≤0.6	0.025	0.019	-0.006	no	insufficient	no	1114	Initial examination data	48	172.7	69.5	23.3	99	70	33	134	201	0.025	yes	71.1	yes	64.05	55.4	1.16	65.2
Summarized Data	0	0	0	1	0	0	1	0	0	yes	yes	yes	yes	0	0	HS(-)VFA(-)	3.6	13.2	9.6	0	25.2	24.4	-0.8	BMI≤0	0.046	0.021	-0.025	no	insufficient	no	1260	Initial examination data	50	181.6	83	25.2	118	81	53	140	145	0.046	yes	85.5	yes	58.05	56.75	1.02	55.5
Summarized Data	0	0	0	0	0	1	0	0	1	yes	yes	yes	yes	0	0	HS(-)VFA(-)	7.5	6.1	-1.4	1	21.1	20.9	-0.2	BMI≤0	0.012	0.346	0.334	yes	insufficient	no	989	Initial examination data	47	173.1	63.2	21.1	113	74	59	87	53	0.012	yes	33.6	yes	68	53.45	1.27	67.8
Summarized Data	1	0	0	0	0	0	0	0	0	yes	yes	yes	yes	0	0	HS(-)VFA(-)	7.7	11.8	4.1	0	25.2	25.2	0	BMI≤0	0.015	0.01	-0.005	no	sufficient	no	371	Initial examination data	42	170.6	73.2	25.2	131	86	44	121	139	0.015	yes	46.8	yes	68.7	51.55	1.33	68.6
Summarized Data	0	1	0	0	1	0	0	0	0	yes	yes	yes	yes	0	0	HS(-)VFA(-)	7.6	11.4	3.8	0	27.7	27.3	-0.4	BMI≤0	0.037	0.045	0.008	yes	sufficient	yes	1099	Initial examination data	31	179.6	89.2	27.7	129	76	35	89	82	0.037	yes	63.7	yes	59.7	54.7	1.09	60.6
Summarized Data	0	0	0	0	0	0	0	0	0	yes	yes	no	yes	0	1	HS(-)VFA(+)	11.1	10.7	-0.4	1	22	22.7	0.7	0.6<BMI	0.021	0.028	0.007	yes	insufficient	yes	743	Initial examination data	52	178.7	70.1	22	114	78	55	118	121	0.021	yes	87.1	yes	62.05	54.75	1.13	61.6
Summarized Data	0	0	0	0	0	0	0	0	0	yes	yes	yes	yes	0	0	HS(-)VFA(-)	9	9.6	0.6	0	22.2	22.6	0.4	0<BMI≤0.6	0.042	0.023	-0.019	no	insufficient	yes	703	Initial examination data	57	169.8	63.9	22.2	117	75	72	128	87	0.042	yes	77	yes	70.25	55.9	1.26	71
Summarized Data	0	0	0	0	0	0	0	0	0	yes	yes	yes	yes	0	0	HS(-)VFA(-)	12.2	16.3	4.1	0	19.2	19.9	0.7	0.6<BMI	0.042	0.01	-0.032	no	insufficient	yes	739	Initial examination data	44	175.5	59.1	19.2	101	68	85	103	60	0.042	yes	33.1	yes	59.1	57.9	1.02	59.4
Summarized Data	0	0	0	0	0	0	0	0	0	yes	yes	yes	yes	0	0	HS(-)VFA(-)	11.5	13.4	1.9	0	22.8	21.8	-1	BMI≤0	0.009	0.005	-0.004	no	insufficient	yes	1161	Initial examination data	53	163.3	60.8	22.8	116	72	70	156	103	0.009	yes	47.5	yes	61.65	55.6	1.11	60.8
Summarized Data	0	1	1	0	1	0	0	0	0	yes	yes	yes	yes	0	0	HS(-)VFA(-)	10.4	11.9	1.5	0	21.5	21.4	-0.1	BMI≤0	0.076	0.077	0.001	yes	sufficient	no	1133	Initial examination data	59	170.6	62.7	21.5	116	69	50	93	164	0.076	yes	89.8	yes	66.15	52.2	1.27	67.2
Summarized Data	0	0	0	0	0	1	0	0	1	yes	yes	yes	yes	0	0	HS(-)VFA(-)	7.8	3.1	-4.7	1	20.4	20.9	0.5	0<BMI≤0.6	0.018	0.143	0.125	yes	insufficient	yes	495	Initial examination data	46	171.8	60.3	20.4	115	73	43	118	120	0.018	yes	63.3	yes	65.1	52.2	1.25	66.5
Summarized Data	1	0	0	1	1	0	0	1	0	yes	yes	yes	yes	0	0	HS(-)VFA(-)	10	12.1	2.1	0	22.8	22.7	-0.1	BMI≤0	0.005	0.005	0	no	sufficient	yes	1079	Initial examination data	50	180.1	73.8	22.8	129	90	54	96	87	0.005	yes	48.8	yes	65.95	51	1.29	65.2
Summarized Data	1	0	1	1	1	1	0	1	0	yes	yes	no	yes	0	1	HS(-)VFA(+)	6.8	7.2	0.4	0	28.2	29.7	1.5	0.6<BMI	0.025	0.021	-0.004	no	sufficient	no	1092	Initial examination data	64	163.2	75.1	28.2	116	77	55	169	132	0.025	yes	93.3	yes	62.4	53.9	1.16	65.8
Summarized Data	1	1	1	1	1	0	0	0	0	yes	yes	yes	yes	0	0	HS(-)VFA(-)	6.2	17.9	11.7	0	22.8	21.6	-1.2	BMI≤0	0.035	0.018	-0.017	no	insufficient	no	721	Initial examination data	47	168.1	64.3	22.8	132	86	51	146	158	0.035	yes	96.3	yes	66	48.8	1.35	67.5
Summarized Data	0	0	0	0	0	0	0	0	0	yes	yes	yes	yes	0	0	HS(-)VFA(-)	5.2	14.4	9.2	0	21.6	21.9	0.3	0<BMI≤0.6	0.046	0.114	0.068	yes	sufficient	yes	1121	Initial examination data	44	167.2	60.4	21.6	121	81	57	117	116	0.046	yes	30	yes	64.6	50.9	1.27	67.3
Summarized Data	1	0	0	1	0	0	0	0	0	yes	yes	yes	yes	0	0	HS(-)VFA(-)	5.4	7.3	1.9	0	25.1	24.6	-0.5	BMI≤0	0.024	0.007	-0.017	no	sufficient	no	370	Initial examination data	47	172.8	74.9	25.1	135	87	70	131	54	0.024	yes	41	yes	67.5	55.1	1.23	68.6
Summarized Data	0	0	0	0	0	0	0	0	0	yes	yes	yes	yes	0	0	HS(-)VFA(-)	11.6	10.2	-1.4	1	17.3	17.1	-0.2	BMI≤0	0.074	0.072	-0.002	no	insufficient	no	722	Initial examination data	43	182	57.3	17.3	100	64	65	124	68	0.074	yes	42	yes	64.95	54.85	1.18	64.3
Summarized Data	0	0	0	0	0	0	0	0	0	yes	yes	yes	yes	0	0	HS(-)VFA(-)	10.4	10	-0.4	1	22.1	22.5	0.4	0<BMI≤0.6	0.033	0.034	0.001	yes	insufficient	yes	368	Initial examination data	50	175.1	67.9	22.1	118	78	68	82	72	0.033	yes	63.3	yes	61.85	51.5	1.2	61.5
Summarized Data	1	1	0	0	1	0	0	0	0	yes	yes	no	no	1	1	HS(+)VFA(+)	4.3	2.6	-1.7	1	23.3	24.4	1.1	0.6<BMI	0.04	0.066	0.026	yes	insufficient	no	796	Initial examination data	56	176.5	72.7	23.3	139	69	44	112	165	0.04	yes	89.9	yes	54.55	52.55	1.04	57
Summarized Data	1	0	0	1	0	1	0	0	1	yes	yes	yes	yes	0	0	HS(-)VFA(-)	9.8	7.5	-2.3	1	20.9	19.3	-1.6	BMI≤0	0.017	0.016	-0.001	no	sufficient	yes	709	Initial examination data	49	164.6	56.5	20.9	137	92	71	122	66	0.017	yes	29.6	yes	63.45	54.75	1.16	65.3
Summarized Data	1	0	0	1	1	0	0	1	0	yes	yes	yes	yes	0	0	HS(-)VFA(-)	7.1	6.6	-0.5	1	26	26.4	0.4	0<BMI≤0.6	0.021	0.028	0.007	yes	insufficient	yes	749	Initial examination data	50	164.9	70.7	26	127	88	70	158	53	0.021	yes	99.5	yes	61.65	53.85	1.14	62.2
Summarized Data	0	1	0	1	1	0	1	0	0	yes	yes	yes	yes	0	0	HS(-)VFA(-)	9.3	14.4	5.1	0	22.7	23.3	0.6	0<BMI≤0.6	0.095	0.026	-0.069	no	sufficient	yes	339	Initial examination data	48	177.2	71.3	22.7	127	81	45	92	214	0.095	yes	52	yes	66.55	54.5	1.22	65.1
Summarized Data	0	0	0	0	0	0	0	0	0	yes	yes	yes	yes	0	0	HS(-)VFA(-)	9.1	8.1	-1	1	23	23.7	0.7	0.6<BMI	0.012	0.026	0.014	yes	insufficient	no	516	Initial examination data	46	170	66.6	23	129	79	50	130	53	0.012	yes	59.1	yes	58.25	55.5	1.05	60.1
Summarized Data	0	1	1	0	1	1	0	0	0	yes	yes	yes	no	1	0	HS(+)VFA(-)	4.1	3.7	-0.4	1	23.6	25.3	1.7	0.6<BMI	0.027	0.022	-0.005	no	insufficient	no	723	Initial examination data	45	167.2	66	23.6	124	78	59	111	97	0.027	yes	66.2	yes	53.3	51.55	1.03	54.2
Summarized Data	0	0	0	0	0	0	0	0	0	yes	yes	yes	yes	0	0	HS(-)VFA(-)	4.6	4.2	-0.4	1	23.4	23.6	0.2	0<BMI≤0.6	0.014	0.165	0.151	yes	insufficient	no	349	Initial examination data	44	174.8	71.5	23.4	118	73	48	123	111	0.014	yes	50.6	yes	66	51.95	1.27	70.8
Summarized Data	1	0	0	1	0	0	0	0	0	yes	yes	yes	yes	0	0	HS(-)VFA(-)	17.1	14.8	-2.3	1	20.7	21.5	0.8	0.6<BMI	0.038	0.031	-0.007	no	sufficient	yes	1147	Initial examination data	53	169.2	59.3	20.7	134	86	95	115	59	0.038	yes	28.7	yes	67	51.65	1.3	66.2
Summarized Data	1	0	0	1	1	0	0	1	0	yes	yes	yes	yes	0	0	HS(-)VFA(-)	18.4	12.7	-5.7	1	22.4	23.1	0.7	0.6<BMI	0.083	0.096	0.013	yes	insufficient	yes	1020	Initial examination data	57	175.2	68.9	22.4	146	93	56	137	92	0.083	yes	50.8	yes	65.3	53.7	1.22	65.9
Summarized Data	0	0	0	0	0	0	0	0	0	yes	yes	yes	yes	0	0	HS(-)VFA(-)	12.2	16.4	4.2	0	23.5	21.2	-2.3	BMI≤0	0.029	0.093	0.064	yes	sufficient	yes	679	Initial examination data	45	164.6	63.7	23.5	115	71	49	114	60	0.029	yes	71.5	yes	64.25	58.1	1.11	65.4
Summarized Data	0	0	0	1	1	1	1	1	1	yes	yes	yes	no	1	0	HS(+)VFA(-)	6.1	5.8	-0.3	1	24	25.1	1.1	0.6<BMI	0.025	0.023	-0.002	no	insufficient	no	368	Initial examination data	52	170.4	69.7	24	122	76	53	161	90	0.025	yes	51	yes	58.3	57.8	1.01	58.9
Summarized Data	1	0	0	1	0	0	0	0	0	yes	yes	yes	yes	0	0	HS(-)VFA(-)	6	9.8	3.8	0	27.3	27.3	0	BMI≤0	0.014	0.015	0.001	yes	insufficient	yes	1113	Initial examination data	45	173.1	81.7	27.3	131	83	64	88	88	0.014	yes	78.7	yes	70.8	54.65	1.3	73
Summarized Data	0	0	0	1	0	0	1	0	0	yes	yes	yes	yes	0	0	HS(-)VFA(-)	2.9	4.6	1.7	0	21.6	21.5	-0.1	BMI≤0	0.016	0.021	0.005	yes	insufficient	no	372	Initial examination data	53	164.6	58.6	21.6	125	83	58	132	66	0.016	yes	64.1	yes	63.5	54.4	1.17	62.7
Summarized Data	0	0	1	0	0	0	0	0	0	yes	yes	yes	yes	0	0	HS(-)VFA(-)	4.6	6.2	1.6	0	21.5	21.7	0.2	0<BMI≤0.6	0.023	0.019	-0.004	no	insufficient	yes	321	Initial examination data	48	179.7	69.4	21.5	110	73	57	116	86	0.023	yes	47.2	yes	64	53.15	1.2	64.4
Summarized Data	0	0	0	0	0	0	0	0	0	yes	yes	yes	yes	0	0	HS(-)VFA(-)	7.3	10.6	3.3	0	20	19.5	-0.5	BMI≤0	0.005	0.006	0.001	yes	insufficient	yes	413	Initial examination data	44	184.6	68.2	20	121	77	64	121	89	0.005	yes	23	yes	66.05	54	1.22	65.3
Summarized Data	0	0	0	0	0	0	0	0	0	yes	yes	yes	yes	0	0	HS(-)VFA(-)	12.9	9.5	-3.4	1	21.3	21.8	0.5	0<BMI≤0.6	0.01	0.005	-0.005	no	sufficient	yes	1092	Initial examination data	41	176.3	66.3	21.3	108	69	65	92	35	0.01	yes	60.1	yes	63.3	52.1	1.21	64.5
Summarized Data	1	1	1	1	1	1	0	0	0	yes	yes	no	yes	0	1	HS(-)VFA(+)	8.5	8.3	-0.2	1	20.7	21.7	1	0.6<BMI	0.019	0.035	0.016	yes	insufficient	no	819	Initial examination data	58	171.4	60.9	20.7	149	92	60	144	161	0.019	yes	80.1	yes	73.2	51.75	1.41	73
Summarized Data	0	0	0	0	0	0	0	0	0	yes	yes	yes	yes	0	0	HS(-)VFA(-)	9.8	13.1	3.3	0	22.3	24	1.7	0.6<BMI	0.131	0.054	-0.077	no	insufficient	no	1099	Initial examination data	45	168.2	63	22.3	119	75	91	100	105	0.131	yes	55.7	yes	65.4	53.35	1.23	65
Summarized Data	0	0	0	1	0	0	1	0	0	yes	yes	yes	yes	0	0	HS(-)VFA(-)	16.1	7.3	-8.8	1	20.6	21.9	1.3	0.6<BMI	0.01	0.01	0	no	insufficient	yes	1064	Initial examination data	47	169.8	59.4	20.6	124	76	78	127	64	0.01	yes	38.1	yes	70.85	53.9	1.31	71.4
Summarized Data	0	0	0	0	0	0	0	0	0	yes	yes	yes	yes	0	0	HS(-)VFA(-)	6.8	9	2.2	0	22.9	22.7	-0.2	BMI≤0	0.039	0.197	0.158	yes	sufficient	yes	1022	Initial examination data	43	174.2	69.6	22.9	118	83	50	114	122	0.039	yes	57.3	yes	64.5	54.05	1.19	64.2
Summarized Data	0	0	1	0	0	1	0	0	0	yes	yes	yes	yes	0	0	HS(-)VFA(-)	3.7	3.7	0	0	19.7	18.7	-1	BMI≤0	0.036	0.026	-0.01	no	sufficient	no	287	Initial examination data	58	166	54.4	19.7	115	71	50	159	139	0.036	yes	74.9	yes	57.4	54.45	1.05	58.5
Summarized Data	0	0	0	0	0	0	0	0	0	yes	yes	yes	yes	0	0	HS(-)VFA(-)	11.8	7.4	-4.4	1	24.8	25.3	0.5	0<BMI≤0.6	0.037	0.032	-0.005	no	insufficient	yes	1120	Initial examination data	48	163.9	66.5	24.8	122	81	67	149	77	0.037	yes	45	yes	68.9	48.85	1.41	69.3
Summarized Data	0	0	0	0	0	0	0	0	0	yes	yes	yes	yes	0	0	HS(-)VFA(-)	10.9	9.3	-1.6	1	19.3	19.6	0.3	0<BMI≤0.6	0.034	0.021	-0.013	no	insufficient	no	1092	Initial examination data	45	168.8	54.9	19.3	111	78	71	97	57	0.034	yes	13.7	yes	69.85	56.45	1.24	67.1
Summarized Data	1	0	0	1	1	0	0	1	0	yes	yes	yes	yes	0	0	HS(-)VFA(-)	6.7	14.5	7.8	0	21.9	23.1	1.2	0.6<BMI	0.012	0.028	0.016	yes	insufficient	yes	791	Initial examination data	45	170.5	63.7	21.9	132	86	76	146	88	0.012	yes	75.9	yes	64.9	55.5	1.17	64
Summarized Data	1	1	0	1	0	0	0	0	0	yes	yes	yes	yes	0	0	HS(-)VFA(-)	12.9	11.6	-1.3	1	18.4	18.4	0	BMI≤0	0.071	0.036	-0.035	no	insufficient	yes	728	Initial examination data	45	182	60.9	18.4	139	87	67	148	173	0.071	yes	67.1	yes	60.75	54.6	1.11	61.1
Summarized Data	1	0	0	0	0	0	0	0	0	yes	yes	yes	yes	0	0	HS(-)VFA(-)	7.5	15	7.5	0	22.4	22.9	0.5	0<BMI≤0.6	0.009	0.254	0.245	yes	sufficient	yes	1080	Initial examination data	44	178.5	71.5	22.4	135	81	90	154	98	0.009	yes	70.5	yes	67.15	56.75	1.18	68.1
Summarized Data	1	0	0	1	0	0	0	0	0	yes	yes	yes	yes	0	0	HS(-)VFA(-)	10	16.1	6.1	0	22.3	22.2	-0.1	BMI≤0	0.008	0.005	-0.003	no	sufficient	yes	371	Initial examination data	52	170.1	64.6	22.3	152	95	63	129	86	0.008	yes	38.5	yes	73.85	56.5	1.31	74.7
Summarized Data	0	0	0	0	0	0	0	0	0	yes	yes	yes	yes	0	0	HS(-)VFA(-)	13.4	15.6	2.2	0	19.7	20.1	0.4	0<BMI≤0.6	0.013	0.015	0.002	yes	insufficient	yes	632	Initial examination data	41	162.3	51.9	19.7	124	77	74	112	81	0.013	yes	61	yes	68.3	57.55	1.19	69.1
Summarized Data	1	0	0	1	0	0	0	0	0	yes	yes	yes	yes	0	0	HS(-)VFA(-)	8.3	7.3	-1	1	24.1	24.1	0	BMI≤0	0.023	0.014	-0.009	no	sufficient	no	728	Initial examination data	46	172.1	71.3	24.1	142	92	45	108	85	0.023	yes	71.1	yes	62	53.3	1.16	60.7
Summarized Data	0	1	0	0	1	0	0	0	0	yes	yes	yes	yes	0	0	HS(-)VFA(-)	12.6	10.6	-2	1	22.9	23	0.1	0<BMI≤0.6	0.023	0.006	-0.017	no	insufficient	no	328	Initial examination data	63	161.9	59.9	22.9	112	79	57	167	150	0.023	yes	61	yes	70.7	53.2	1.33	74.6
Summarized Data	1	0	0	1	0	0	0	0	0	yes	yes	yes	yes	0	0	HS(-)VFA(-)	6.5	13.5	7	0	21.4	20.7	-0.7	BMI≤0	0.011	0.004	-0.007	no	insufficient	yes	358	Initial examination data	49	173.7	64.7	21.4	131	81	47	110	72	0.011	yes	56.4	yes	67.35	53.85	1.25	66.1
Summarized Data	0	0	1	0	1	1	0	1	0	yes	yes	yes	yes	0	0	HS(-)VFA(-)	7.8	8.7	0.9	0	25.3	26.3	1	0.6<BMI	0.021	0.01	-0.011	no	sufficient	no	722	Initial examination data	56	173.6	76.2	25.3	115	79	62	151	120	0.021	yes	80	yes	65.7	52.35	1.26	67.3
Summarized Data	1	0	0	1	0	0	0	0	0	yes	yes	yes	yes	0	0	HS(-)VFA(-)	8.2	10.2	2	0	25.8	24.8	-1	BMI≤0	0.028	0.028	0	no	sufficient	yes	728	Initial examination data	50	166.1	71.1	25.8	145	89	60	68	121	0.028	yes	94.9	yes	63.6	53.3	1.19	62
Summarized Data	1	0	0	0	0	0	0	0	0	yes	yes	yes	yes	0	0	HS(-)VFA(-)	17.4	12.6	-4.8	1	22.3	22.6	0.3	0<BMI≤0.6	0.014	0.009	-0.005	no	insufficient	yes	371	Initial examination data	54	176	69.2	22.3	140	91	103	114	70	0.014	yes	61.1	yes	67	51.3	1.31	67.7
Summarized Data	0	0	0	0	0	0	0	0	0	yes	yes	yes	yes	0	0	HS(-)VFA(-)	24.7	22.7	-2	1	18.1	17.8	-0.3	BMI≤0	0.008	0.011	0.003	yes	insufficient	no	684	Initial examination data	49	166.1	50	18.1	114	74	60	155	114	0.008	yes	52.1	yes	75.3	54.4	1.38	74.7
Summarized Data	1	0	1	1	0	1	0	0	0	yes	yes	yes	yes	0	0	HS(-)VFA(-)	1.9	1.8	-0.1	1	21.9	20.7	-1.2	BMI≤0	0.011	0.008	-0.003	no	insufficient	yes	307	Initial examination data	52	166.2	60.4	21.9	139	85	123	104	71	0.011	yes	77.9	yes	68.6	54.75	1.25	67.2
Summarized Data	0	0	0	0	0	0	0	0	0	yes	yes	yes	yes	0	0	HS(-)VFA(-)	4.6	6.5	1.9	0	25.6	26.9	1.3	0.6<BMI	0.015	0.054	0.039	yes	sufficient	yes	805	Initial examination data	43	175.5	78.8	25.6	120	78	61	131	105	0.015	yes	76.3	yes	55.15	50.9	1.08	56.8
Summarized Data	1	0	1	1	0	1	0	0	0	yes	yes	yes	yes	0	0	HS(-)VFA(-)	5.5	4.3	-1.2	1	23.7	23.3	-0.4	BMI≤0	0.01	0.004	-0.006	no	sufficient	yes	413	Initial examination data	54	174.7	72.3	23.7	168	102	93	81	68	0.01	yes	54.9	yes	74.15	53.25	1.39	73.9
Summarized Data	1	0	1	1	1	1	0	1	0	yes	yes	no	yes	0	1	HS(-)VFA(+)	4	3.8	-0.2	1	26.4	29.6	3.2	0.6<BMI	0.16	0.12	-0.04	no	insufficient	no	364	Initial examination data	43	163.8	70.9	26.4	153	95	43	133	107	0.16	yes	90.1	yes	57.3	56	1.02	58.1
Summarized Data	1	0	1	1	0	1	0	0	0	yes	yes	yes	yes	0	0	HS(-)VFA(-)	7.2	9.7	2.5	0	20	20.5	0.5	0<BMI≤0.6	0.019	0.023	0.004	yes	insufficient	yes	1128	Initial examination data	49	171.4	58.9	20	107	70	65	76	66	0.019	yes	39.2	yes	64.35	51.95	1.24	63.5
Summarized Data	1	0	0	1	0	0	0	0	0	yes	yes	yes	yes	0	0	HS(-)VFA(-)	9.1	9.5	0.4	0	16.1	16.4	0.3	0<BMI≤0.6	0.011	0.011	0	no	insufficient	no	1008	Initial examination data	48	162.8	42.6	16.1	123	86	73	111	47	0.011	yes	19.7	yes	68.35	58.25	1.17	69.6
Summarized Data	0	1	0	1	0	0	1	0	0	yes	yes	yes	no	1	0	HS(+)VFA(-)	3.4	4.3	0.9	0	23.3	23.8	0.5	0<BMI≤0.6	0.026	0.281	0.255	yes	insufficient	no	301	Initial examination data	42	176.8	72.8	23.3	126	76	50	146	234	0.026	yes	70.9	yes	60.5	53.45	1.13	61.2
Summarized Data	1	0	0	1	0	0	0	0	0	yes	yes	yes	yes	0	0	HS(-)VFA(-)	13.3	12.4	-0.9	1	21.9	22.4	0.5	0<BMI≤0.6	0.023	0.031	0.008	yes	sufficient	yes	373	Initial examination data	40	172.5	65.1	21.9	148	97	77	135	91	0.023	yes	62.3	yes	68.5	55.15	1.24	69.5
Summarized Data	1	0	0	1	1	1	0	1	1	yes	yes	yes	yes	0	0	HS(-)VFA(-)	4.3	5.3	1	0	20.6	20.1	-0.5	BMI≤0	0.402	0.201	-0.201	no	insufficient	no	1171	Initial examination data	56	159.7	52.6	20.6	120	72	45	145	123	0.402	yes	84.6	yes	64.6	54.9	1.18	66.2
Summarized Data	1	0	0	1	0	0	0	0	0	yes	yes	yes	yes	0	0	HS(-)VFA(-)	19.8	11.8	-8	1	25.1	24.4	-0.7	BMI≤0	0.028	0.011	-0.017	no	sufficient	no	862	Initial examination data	43	184.4	85.3	25.1	144	86	48	115	43	0.028	yes	80.1	yes	63.1	57.25	1.1	64.6
Summarized Data	0	0	0	0	0	0	0	0	0	yes	yes	yes	yes	0	0	HS(-)VFA(-)	10.4	12.3	1.9	0	23.2	22.3	-0.9	BMI≤0	0.009	0.012	0.003	yes	insufficient	no	572	Initial examination data	57	165.8	63.7	23.2	122	80	54	155	106	0.009	yes	44.6	yes	63.75	54.35	1.17	63.1
Summarized Data	0	0	0	0	0	0	0	0	0	yes	yes	yes	yes	0	0	HS(-)VFA(-)	11.1	11.9	0.8	0	20.4	21.1	0.7	0.6<BMI	0.018	0.031	0.013	yes	insufficient	no	706	Initial examination data	46	172.4	60.7	20.4	117	75	65	105	82	0.018	yes	63.7	yes	63.5	54.85	1.16	63.6
Summarized Data	0	0	0	0	0	0	0	0	0	yes	yes	yes	yes	0	0	HS(-)VFA(-)	6.6	5.8	-0.8	1	21.7	22.3	0.6	0<BMI≤0.6	0.019	0.082	0.063	yes	sufficient	no	663	Initial examination data	45	177	68.1	21.7	108	68	54	102	71	0.019	yes	21.5	yes	60.6	53.5	1.13	62.5
Summarized Data	0	0	0	0	1	0	0	1	0	yes	yes	yes	yes	0	0	HS(-)VFA(-)	15	7.6	-7.4	1	23.1	24.5	1.4	0.6<BMI	0.02	0.021	0.001	yes	sufficient	yes	384	Initial examination data	47	173	69	23.1	116	76	48	108	85	0.02	yes	50.4	yes	67.8	56.35	1.2	67.7
Summarized Data	0	0	0	0	0	0	0	0	0	yes	yes	yes	yes	0	0	HS(-)VFA(-)	9.6	13	3.4	0	22.1	22.2	0.1	0<BMI≤0.6	0.007	0.006	-0.001	no	insufficient	no	737	Initial examination data	43	173.1	66.3	22.1	128	77	56	129	142	0.007	yes	56.9	yes	68.75	53.65	1.28	69.4
Summarized Data	1	0	0	1	0	1	0	0	1	yes	yes	yes	yes	0	0	HS(-)VFA(-)	5.6	2.7	-2.9	1	19.8	20.4	0.6	0<BMI≤0.6	0.012	0.075	0.063	yes	insufficient	yes	1104	Initial examination data	40	173.6	59.7	19.8	139	97	84	97	72	0.012	yes	44.1	yes	65.45	52.9	1.24	64.8
Summarized Data	0	0	1	0	0	1	0	0	0	yes	yes	yes	yes	0	0	HS(-)VFA(-)	6.5	11.6	5.1	0	20.9	19.7	-1.2	BMI≤0	0.014	0.013	-0.001	no	insufficient	yes	366	Initial examination data	47	164.8	56.8	20.9	128	82	68	95	45	0.014	yes	46.3	yes	66.35	53	1.25	68.6
Summarized Data	1	0	0	1	0	0	0	0	0	yes	yes	yes	yes	0	0	HS(-)VFA(-)	11.1	9.7	-1.4	1	22.4	23.2	0.8	0.6<BMI	0.006	0.144	0.138	yes	insufficient	no	376	Initial examination data	48	168.8	63.7	22.4	134	93	62	167	103	0.006	yes	36.7	yes	66.7	57.45	1.16	65.4
Summarized Data	0	1	0	0	1	0	0	0	0	yes	yes	no	yes	0	1	HS(-)VFA(+)	3.8	6.4	2.6	0	23.7	24.7	1	0.6<BMI	0.011	0.027	0.016	yes	sufficient	no	763	Initial examination data	42	174.6	72.4	23.7	124	78	46	92	322	0.011	yes	77	yes	63.3	56.35	1.12	64.3
Summarized Data	1	0	0	1	0	0	0	0	0	yes	yes	yes	yes	0	0	HS(-)VFA(-)	18.9	12.6	-6.3	1	22.2	23.1	0.9	0.6<BMI	0.424	0.071	-0.353	no	sufficient	no	374	Initial examination data	51	172.9	66.5	22.2	129	89	88	117	76	0.424	yes	53.9	yes	66.25	51.9	1.28	67.6
Summarized Data	1	0	0	1	1	0	0	1	0	yes	yes	yes	yes	0	0	HS(-)VFA(-)	13.6	17	3.4	0	22.5	23.1	0.6	0<BMI≤0.6	0.382	0.084	-0.298	no	sufficient	yes	225	Initial examination data	45	183.3	75.5	22.5	152	93	55	91	122	0.382	yes	48.3	yes	65.65	59.15	1.11	65.1
Summarized Data	0	1	0	0	1	0	0	0	0	yes	yes	yes	yes	0	0	HS(-)VFA(-)	13.8	13.9	0.1	0	20.1	20.1	0	BMI≤0	0.016	0.016	0	no	insufficient	yes	1085	Initial examination data	48	179.2	64.4	20.1	120	73	102	128	58	0.016	yes	53.3	yes	65.1	53.15	1.22	64.7
Summarized Data	1	0	0	1	0	0	0	0	0	yes	yes	yes	yes	0	0	HS(-)VFA(-)	5.2	13	7.8	0	23.4	22.6	-0.8	BMI≤0	0.036	0.045	0.009	yes	insufficient	no	611	Initial examination data	41	181.3	76.9	23.4	133	82	61	107	108	0.036	yes	55.2	yes	64.6	55.95	1.15	67.1
Summarized Data	0	1	0	0	1	0	0	0	0	yes	yes	yes	no	1	0	HS(+)VFA(-)	4.1	5.1	1	0	23	23.3	0.3	0<BMI≤0.6	0.098	0.082	-0.016	no	insufficient	no	1093	Initial examination data	43	166.4	63.8	23	122	76	46	96	210	0.098	yes	73	yes	56.7	55.7	1.02	57
Summarized Data	0	1	0	0	0	0	0	0	0	yes	yes	yes	yes	0	0	HS(-)VFA(-)	8.1	10.2	2.1	0	23.6	22.5	-1.1	BMI≤0	0.015	0.133	0.118	yes	sufficient	no	1140	Initial examination data	45	171.1	69	23.6	127	83	50	114	213	0.015	yes	59.3	yes	66.45	59.65	1.11	62.9
Summarized Data	1	0	0	0	0	0	0	0	0	yes	yes	yes	yes	0	0	HS(-)VFA(-)	20.5	13.2	-7.3	1	18.7	19	0.3	0<BMI≤0.6	0.012	0.012	0	no	sufficient	no	609	Initial examination data	47	170.6	54.5	18.7	130	82	55	56	89	0.012	yes	17.9	yes	65.8	49.3	1.33	66.3
Summarized Data	0	0	0	1	1	0	1	1	0	yes	yes	yes	yes	0	0	HS(-)VFA(-)	4.5	8.3	3.8	0	20.7	20.5	-0.2	BMI≤0	0.025	0.029	0.004	yes	insufficient	yes	372	Initial examination data	41	177.9	65.6	20.7	121	79	45	145	120	0.025	yes	80.6	yes	58.3	55.65	1.05	59.2
Summarized Data	0	0	0	0	0	0	0	0	0	yes	yes	yes	yes	0	0	HS(-)VFA(-)	16	26.7	10.7	0	20.1	20.2	0.1	0<BMI≤0.6	0.007	0.005	-0.002	no	insufficient	no	917	Initial examination data	42	176.6	62.6	20.1	102	68	59	99	93	0.007	yes	45.9	yes	68.15	59.65	1.14	69.3
Summarized Data	1	0	0	1	1	0	0	1	0	yes	yes	yes	yes	0	0	HS(-)VFA(-)	11.9	7.6	-4.3	1	26.8	27.6	0.8	0.6<BMI	0.026	0.306	0.28	yes	sufficient	no	363	Initial examination data	41	177.4	84.4	26.8	150	102	50	145	135	0.026	yes	56.5	yes	65.9	54.75	1.2	65.2
Summarized Data	0	0	0	0	0	0	0	0	0	yes	yes	yes	yes	0	0	HS(-)VFA(-)	7.7	13.4	5.7	0	20.2	20.1	-0.1	BMI≤0	0.01	0.014	0.004	yes	sufficient	no	378	Initial examination data	44	169.7	58.3	20.2	112	73	84	79	26	0.01	yes	19.6	yes	60.35	52	1.16	59.6
Summarized Data	0	0	0	0	0	0	0	0	0	yes	yes	yes	yes	0	0	HS(-)VFA(-)	21.9	9.7	-12.2	1	20.7	20.9	0.2	0<BMI≤0.6	0.059	0.014	-0.045	no	insufficient	yes	671	Initial examination data	56	168.1	58.4	20.7	127	80	61	129	60	0.059	yes	42.3	yes	66.1	54.65	1.21	67.3
Summarized Data	0	1	0	0	1	0	0	0	0	yes	yes	yes	yes	0	0	HS(-)VFA(-)	3.9	5.3	1.4	0	23.6	22.9	-0.7	BMI≤0	0.24	0.135	-0.105	no	sufficient	no	352	Initial examination data	47	185.4	81.2	23.6	121	76	40	134	344	0.24	yes	68.4	yes	62.15	53.9	1.15	65.4
Summarized Data	0	1	0	1	1	0	1	0	0	yes	yes	no	yes	0	1	HS(-)VFA(+)	5	8.6	3.6	0	26.5	26.7	0.2	0<BMI≤0.6	0.041	0.057	0.016	yes	sufficient	no	1091	Initial examination data	42	174.8	81	26.5	129	82	37	111	280	0.041	yes	99.3	yes	62.2	55.65	1.12	60.7
Summarized Data	0	0	0	0	0	0	0	0	0	yes	yes	yes	yes	0	0	HS(-)VFA(-)	12.3	9.9	-2.4	1	20.1	21.1	1	0.6<BMI	0.014	0.016	0.002	yes	sufficient	yes	1029	Initial examination data	53	164.7	54.4	20.1	97	67	78	154	77	0.014	yes	65.2	yes	64.1	52.7	1.22	64.5
Summarized Data	1	1	1	1	0	0	0	0	0	yes	yes	yes	yes	0	0	HS(-)VFA(-)	4.9	5.9	1	0	23.9	24.7	0.8	0.6<BMI	0.042	0.026	-0.016	no	sufficient	yes	1113	Initial examination data	45	167.4	67.1	23.9	134	89	46	87	153	0.042	yes	64.4	yes	64.55	57.65	1.12	65.7
Summarized Data	0	0	0	0	0	0	0	0	0	yes	yes	yes	yes	0	0	HS(-)VFA(-)	7.3	12.3	5	0	19.5	19.8	0.3	0<BMI≤0.6	0.014	0.011	-0.003	no	sufficient	no	1042	Initial examination data	45	174.1	59.2	19.5	121	79	63	136	75	0.014	yes	37.7	yes	65.7	55.15	1.19	64.8
Summarized Data	0	0	0	0	0	0	0	0	0	yes	yes	yes	yes	0	0	HS(-)VFA(-)	11.2	21.1	9.9	0	22.5	20.6	-1.9	BMI≤0	0.05	0.029	-0.021	no	sufficient	no	364	Initial examination data	60	169.4	64.6	22.5	124	77	55	176	94	0.05	yes	75.9	yes	59.75	49	1.22	60.3
Summarized Data	0	1	0	0	0	0	0	0	0	yes	yes	yes	yes	0	0	HS(-)VFA(-)	13.8	19.8	6	0	24.8	24.1	-0.7	BMI≤0	0.084	0.318	0.234	yes	insufficient	no	1219	Initial examination data	52	172.5	73.9	24.8	114	77	47	104	272	0.084	yes	70.1	yes	59.85	51.55	1.16	60.1
Summarized Data	0	1	0	1	1	0	1	0	0	yes	yes	yes	yes	0	0	HS(-)VFA(-)	6.7	12.6	5.9	0	23.2	22.3	-0.9	BMI≤0	0.294	0.022	-0.272	no	insufficient	yes	1099	Initial examination data	45	176.1	71.9	23.2	128	82	74	125	162	0.294	yes	67.4	yes	64.25	54.85	1.17	63.8
Summarized Data	1	0	1	0	0	0	0	0	0	yes	yes	yes	yes	0	0	HS(-)VFA(-)	8	13.6	5.6	0	20.6	20.8	0.2	0<BMI≤0.6	0.023	0.028	0.005	yes	sufficient	yes	386	Initial examination data	64	166.5	57.2	20.6	132	83	68	143	64	0.023	yes	71	yes	63.1	58.75	1.07	64.6
Summarized Data	0	1	0	1	0	0	1	0	0	yes	yes	yes	yes	0	0	HS(-)VFA(-)	10.7	7.5	-3.2	1	22	21.2	-0.8	BMI≤0	0.11	0.265	0.155	yes	sufficient	yes	1092	Initial examination data	54	157.6	54.7	22	124	83	36	118	139	0.11	yes	73.7	yes	65.3	55.55	1.18	65.9
Summarized Data	0	0	0	1	0	0	1	0	0	yes	yes	yes	yes	0	0	HS(-)VFA(-)	9.9	6.4	-3.5	1	23	24.9	1.9	0.6<BMI	0.011	0.011	0	no	insufficient	no	701	Initial examination data	33	173.5	69.2	23	128	74	62	91	57	0.011	yes	46.7	yes	70.4	56.7	1.24	70.9
Summarized Data	0	0	0	0	0	0	0	0	0	yes	yes	no	no	1	1	HS(+)VFA(+)	7.3	9	1.7	0	22.6	22.7	0.1	0<BMI≤0.6	0.04	0.02	-0.02	no	insufficient	no	973	Initial examination data	46	172.7	67.4	22.6	125	76	40	144	129	0.04	yes	90.2	yes	58.6	54.3	1.08	60.6
Summarized Data	1	0	0	1	1	0	0	1	0	yes	yes	yes	yes	0	0	HS(-)VFA(-)	6.6	9.2	2.6	0	23.3	23.6	0.3	0<BMI≤0.6	0.031	0.046	0.015	yes	insufficient	no	745	Initial examination data	43	165	63.3	23.3	138	79	53	110	130	0.031	yes	59.1	yes	57.35	51.35	1.12	59.3
Summarized Data	0	0	0	0	0	0	0	0	0	yes	yes	yes	yes	0	0	HS(-)VFA(-)	11.5	7.6	-3.9	1	26.2	22.9	-3.3	BMI≤0	0.15	0.022	-0.128	no	insufficient	no	737	Initial examination data	45	165.3	71.5	26.2	113	71	47	151	139	0.15	yes	85.7	yes	69.35	55.15	1.26	73.2
Summarized Data	0	0	0	0	0	0	0	0	0	yes	yes	yes	yes	0	0	HS(-)VFA(-)	8.7	17.8	9.1	0	25.9	25.3	-0.6	BMI≤0	0.042	0.523	0.481	yes	sufficient	no	379	Initial examination data	45	169.8	74.6	25.9	115	75	62	58	88	0.042	yes	87	yes	66.35	53.75	1.23	67.4
Summarized Data	1	1	1	1	0	0	0	0	0	yes	yes	yes	yes	0	0	HS(-)VFA(-)	3.6	5.4	1.8	0	22.1	22	-0.1	BMI≤0	0.007	0.011	0.004	yes	insufficient	no	374	Initial examination data	51	167.2	61.9	22.1	148	92	45	75	193	0.007	yes	73.7	yes	59.95	54.5	1.1	58.5
Summarized Data	0	1	0	0	1	0	0	0	0	yes	yes	no	yes	0	1	HS(-)VFA(+)	7.3	6.5	-0.8	1	21.3	21.8	0.5	0<BMI≤0.6	0.335	0.215	-0.12	no	insufficient	yes	721	Initial examination data	59	170.6	62	21.3	105	71	70	140	151	0.335	yes	78.7	yes	62.3	58.15	1.07	62.6
Summarized Data	0	0	0	0	0	0	0	0	0	yes	yes	yes	yes	0	0	HS(-)VFA(-)	9.2	10.9	1.7	0	23.3	22.6	-0.7	BMI≤0	0.015	0.009	-0.006	no	sufficient	no	1093	Initial examination data	56	173.5	70.2	23.3	118	81	66	154	149	0.015	yes	51.7	yes	68.05	53.45	1.27	65.9
Summarized Data	0	0	0	0	0	0	0	0	0	yes	yes	yes	yes	0	0	HS(-)VFA(-)	12.5	17.1	4.6	0	21.7	20.3	-1.4	BMI≤0	0.213	0.264	0.051	yes	sufficient	no	1120	Initial examination data	43	181.4	71.5	21.7	121	78	54	134	75	0.213	yes	41.1	yes	62.65	54.35	1.15	62.3
Summarized Data	1	0	0	1	0	1	0	0	1	yes	yes	yes	yes	0	0	HS(-)VFA(-)	8.4	5.3	-3.1	1	21	21.2	0.2	0<BMI≤0.6	0.051	0.043	-0.008	no	insufficient	yes	330	Initial examination data	48	170	60.7	21	139	89	84	93	104	0.051	yes	45.1	yes	68.6	52.05	1.32	69.4
Summarized Data	0	0	0	0	1	0	0	1	0	yes	yes	yes	yes	0	0	HS(-)VFA(-)	6.1	7.1	1	0	21.8	21.6	-0.2	BMI≤0	0.004	0.004	0	no	insufficient	no	1100	Initial examination data	43	166.3	60.2	21.8	105	64	47	172	124	0.004	yes	38.2	yes	65.6	53.3	1.23	64.4
Summarized Data	1	1	0	1	1	1	0	0	1	yes	yes	yes	yes	0	0	HS(-)VFA(-)	3.8	3.1	-0.7	1	22.8	22.4	-0.4	BMI≤0	0.017	0.006	-0.011	no	sufficient	no	1058	Initial examination data	52	166.1	63	22.8	137	87	56	88	113	0.017	yes	68.7	yes	60.1	52.6	1.14	62.8
Summarized Data	1	0	0	1	0	0	0	0	0	yes	yes	yes	yes	0	0	HS(-)VFA(-)	17.3	14.9	-2.4	1	22.7	23.7	1	0.6<BMI	0.102	0.009	-0.093	no	insufficient	yes	1092	Initial examination data	51	177.5	71.6	22.7	126	87	91	32	32	0.102	yes	54.5	yes	63.15	53.7	1.18	62.9
Summarized Data	0	0	0	0	1	0	0	1	0	yes	yes	no	yes	0	1	HS(-)VFA(+)	11.8	6.1	-5.7	1	23.6	24.8	1.2	0.6<BMI	0.072	0.058	-0.014	no	insufficient	yes	961	Initial examination data	44	160.4	60.6	23.6	124	79	65	115	135	0.072	yes	94.2	yes	66.65	57.95	1.15	68.4
Summarized Data	1	0	1	1	0	0	0	0	0	yes	yes	yes	yes	0	0	HS(-)VFA(-)	5.3	4.9	-0.4	1	22.2	23.3	1.1	0.6<BMI	0.024	0.925	0.901	yes	sufficient	no	727	Initial examination data	46	176.4	69	22.2	151	100	57	108	55	0.024	yes	48.8	yes	60.9	51.45	1.18	61.9
Summarized Data	0	1	1	0	1	0	0	0	0	yes	yes	yes	yes	0	0	HS(-)VFA(-)	5.8	8.3	2.5	0	23.2	23.9	0.7	0.6<BMI	0.011	0.008	-0.003	no	insufficient	no	630	Initial examination data	45	170.9	67.9	23.2	114	70	62	103	158	0.011	yes	35.4	yes	67.45	57.1	1.18	67.2
Summarized Data	0	0	0	1	0	0	1	0	0	yes	yes	yes	yes	0	0	HS(-)VFA(-)	6.6	8.8	2.2	0	20.4	21.8	1.4	0.6<BMI	0.018	0.013	-0.005	no	insufficient	yes	1102	Initial examination data	42	171.7	60.2	20.4	122	79	53	128	85	0.018	yes	77.2	yes	60.5	52.55	1.15	61
Summarized Data	0	0	0	0	0	0	0	0	0	yes	yes	no	yes	0	1	HS(-)VFA(+)	3.5	4.2	0.7	0	20.9	21.5	0.6	0<BMI≤0.6	0.254	0.019	-0.235	no	insufficient	no	393	Initial examination data	46	169.1	59.8	20.9	121	73	50	139	79	0.254	yes	66.5	yes	61.95	55.5	1.12	61
Summarized Data	0	0	1	0	0	0	0	0	0	yes	yes	yes	yes	0	0	HS(-)VFA(-)	2.7	6.2	3.5	0	23.8	23.1	-0.7	BMI≤0	0.034	0.025	-0.009	no	insufficient	no	365	Initial examination data	45	169.7	68.4	23.8	120	73	58	144	104	0.034	yes	64.5	yes	62.85	51.35	1.22	62.1
Summarized Data	1	1	1	1	1	1	0	0	0	yes	yes	yes	yes	0	0	HS(-)VFA(-)	3	3.3	0.3	0	24.6	23.8	-0.8	BMI≤0	0.039	0.035	-0.004	no	sufficient	no	1134	Initial examination data	46	172.9	73.6	24.6	168	106	42	143	127	0.039	yes	80	yes	59	55.1	1.07	58.1
Summarized Data	0	0	0	1	0	0	1	0	0	yes	yes	yes	yes	0	0	HS(-)VFA(-)	7.8	5.5	-2.3	1	21.6	22.3	0.7	0.6<BMI	0.025	0.015	-0.01	no	sufficient	yes	1069	Initial examination data	53	163.9	58.1	21.6	99	65	78	83	50	0.025	yes	14.6	yes	67.15	53.45	1.26	67.2
Summarized Data	0	1	1	0	1	1	0	0	0	yes	yes	yes	yes	0	0	HS(-)VFA(-)	5.8	29.8	24	0	23.6	22.8	-0.8	BMI≤0	0.021	0.026	0.005	yes	insufficient	yes	260	Initial examination data	44	168.2	66.9	23.6	124	77	38	108	317	0.021	yes	83.2	yes	57.35	54.3	1.06	54.5
Summarized Data	1	0	0	0	0	0	0	0	0	yes	yes	no	yes	0	1	HS(-)VFA(+)	1.8	2.1	0.3	0	27.1	27.2	0.1	0<BMI≤0.6	0.065	0.079	0.014	yes	insufficient	no	1143	Initial examination data	42	173.9	82.1	27.1	134	90	50	103	143	0.065	yes	83	yes	64.1	52.25	1.23	62.5
Summarized Data	0	0	0	0	0	0	0	0	0	yes	yes	yes	yes	0	0	HS(-)VFA(-)	9.7	10.7	1	0	19.2	18.7	-0.5	BMI≤0	0.008	0.006	-0.002	no	sufficient	no	363	Initial examination data	44	172.9	57.5	19.2	104	65	68	159	131	0.008	yes	73.2	yes	65.45	57.15	1.15	67.2
Summarized Data	0	0	0	0	0	0	0	0	0	yes	yes	yes	no	1	0	HS(+)VFA(-)	13.3	8	-5.3	1	20.1	21.5	1.4	0.6<BMI	0.022	0.01	-0.012	no	insufficient	no	1114	Initial examination data	42	176.6	62.8	20.1	115	77	60	105	74	0.022	yes	51.2	yes	63.2	54.35	1.16	64.4
Summarized Data	1	0	0	0	0	0	0	0	0	yes	yes	yes	yes	0	0	HS(-)VFA(-)	14.3	9.3	-5	1	20.5	21	0.5	0<BMI≤0.6	0.027	0.043	0.016	yes	insufficient	yes	702	Initial examination data	60	177.1	64.4	20.5	135	84	92	95	83	0.027	yes	43.5	yes	64.55	51.35	1.26	64.2
Summarized Data	0	0	1	0	0	1	0	0	0	yes	yes	yes	yes	0	0	HS(-)VFA(-)	9	6.8	-2.2	1	19.6	21.4	1.8	0.6<BMI	0.011	0.009	-0.002	no	sufficient	no	728	Initial examination data	74	165.2	53.4	19.6	116	69	105	109	63	0.011	yes	15.4	yes	61.85	53.25	1.16	60.4
Summarized Data	0	0	1	0	0	1	0	0	0	yes	yes	no	no	1	1	HS(+)VFA(+)	4.3	3.2	-1.1	1	25.6	27.3	1.7	0.6<BMI	0.03	0.039	0.009	yes	insufficient	no	1097	Initial examination data	44	170.1	74	25.6	110	75	47	152	130	0.03	yes	86.9	yes	59.45	56.6	1.05	59.1
Summarized Data	0	0	1	0	0	0	0	0	0	yes	yes	yes	yes	0	0	HS(-)VFA(-)	6.7	11.2	4.5	0	21.3	20.3	-1	BMI≤0	0.034	0.018	-0.016	no	insufficient	no	776	Initial examination data	44	184.2	72.4	21.3	117	70	63	109	94	0.034	yes	44.3	yes	64.45	53	1.22	65.3
Summarized Data	1	1	1	1	1	1	0	0	0	yes	yes	no	yes	0	1	HS(-)VFA(+)	5.4	10.5	5.1	0	22.4	22.3	-0.1	BMI≤0	0.029	0.021	-0.008	no	sufficient	no	722	Initial examination data	58	173.3	67.4	22.4	136	86	62	103	141	0.029	yes	92.2	yes	59.35	54.65	1.09	60.5
Summarized Data	1	0	0	1	0	0	0	0	0	yes	yes	yes	yes	0	0	HS(-)VFA(-)	6.3	6.4	0.1	0	20.5	21.4	0.9	0.6<BMI	0.02	2.7	2.68	yes	sufficient	no	350	Initial examination data	43	171.2	60.1	20.5	135	85	59	101	108	0.02	yes	72.6	yes	62.7	51.8	1.21	62.5
Summarized Data	0	0	0	0	0	0	0	0	0	yes	yes	yes	yes	0	0	HS(-)VFA(-)	20.2	11.1	-9.1	1	22.9	22.8	-0.1	BMI≤0	0.138	0.011	-0.127	no	insufficient	no	273	Initial examination data	41	174.2	69.6	22.9	119	77	71	105	55	0.138	yes	29.8	yes	71.55	58.65	1.22	70.2
Summarized Data	1	1	0	1	1	0	0	0	0	yes	yes	yes	yes	0	0	HS(-)VFA(-)	6	5.6	-0.4	1	23.6	25.3	1.7	0.6<BMI	0.018	0.015	-0.003	no	insufficient	no	1084	Initial examination data	43	176.2	73.4	23.6	137	91	63	173	153	0.018	yes	71	yes	63.8	53	1.2	62.6
Summarized Data	1	0	0	0	0	0	0	0	0	yes	yes	yes	yes	0	0	HS(-)VFA(-)	6.2	8.7	2.5	0	23	21.5	-1.5	BMI≤0	0.015	0.011	-0.004	no	insufficient	no	584	Initial examination data	43	169.4	65.9	23	134	85	48	118	117	0.015	yes	55.7	yes	57.85	52.35	1.11	60.2
Summarized Data	1	0	1	1	0	1	0	0	0	yes	yes	yes	yes	0	0	HS(-)VFA(-)	9.8	8.4	-1.4	1	22.6	23.3	0.7	0.6<BMI	0.023	0.106	0.083	yes	insufficient	yes	1127	Initial examination data	59	167.9	63.8	22.6	135	97	63	89	95	0.023	yes	74.1	yes	66.7	50.7	1.32	67.5
Summarized Data	1	0	1	0	0	0	0	0	0	yes	yes	yes	yes	0	0	HS(-)VFA(-)	3.6	7.1	3.5	0	23.1	23.4	0.3	0<BMI≤0.6	0.029	0.043	0.014	yes	insufficient	yes	770	Initial examination data	58	164	62.2	23.1	132	80	66	103	72	0.029	yes	89.3	yes	67.8	54.9	1.23	67.5
Summarized Data	0	1	0	0	0	0	0	0	0	yes	yes	yes	yes	0	0	HS(-)VFA(-)	8.9	23.6	14.7	0	23.7	22.6	-1.1	BMI≤0	0.043	0.199	0.156	yes	insufficient	yes	1098	Initial examination data	44	166.7	65.9	23.7	120	80	63	124	154	0.043	yes	78.6	yes	62.55	48.15	1.3	64.9
Summarized Data	0	0	0	0	1	0	0	1	0	yes	yes	yes	yes	0	0	HS(-)VFA(-)	19.9	18.4	-1.5	1	24	24	0	BMI≤0	0.031	0.047	0.016	yes	insufficient	no	810	Initial examination data	57	166.2	66.3	24	100	62	45	126	109	0.031	yes	88.6	yes	59	53.1	1.11	58.7
Summarized Data	0	0	0	0	0	0	0	0	0	yes	yes	yes	yes	0	0	HS(-)VFA(-)	6.2	7.1	0.9	0	23.8	23	-0.8	BMI≤0	0.062	0.012	-0.05	no	insufficient	no	735	Initial examination data	42	165.5	65.3	23.8	118	66	76	126	73	0.062	yes	56.9	yes	61.25	56.35	1.09	59.7
Summarized Data	0	0	0	0	0	0	0	0	0	yes	yes	yes	yes	0	0	HS(-)VFA(-)	9.3	7.6	-1.7	1	22.7	24.3	1.6	0.6<BMI	0.039	0.021	-0.018	no	insufficient	no	1099	Initial examination data	42	173.1	68	22.7	100	65	48	79	78	0.039	yes	24.4	yes	60.85	53.25	1.14	60.8
Summarized Data	0	0	0	0	0	0	0	0	0	yes	yes	yes	yes	0	0	HS(-)VFA(-)	15.3	5.7	-9.6	1	18.5	19.3	0.8	0.6<BMI	0.04	0.022	-0.018	no	insufficient	no	336	Initial examination data	47	178.8	59	18.5	98	68	57	91	54	0.04	yes	58.3	yes	59.75	54.85	1.09	57.8
Summarized Data	0	0	0	1	0	0	1	0	0	yes	yes	no	yes	0	1	HS(-)VFA(+)	8.1	8.9	0.8	0	23.8	24.1	0.3	0<BMI≤0.6	0.036	0.028	-0.008	no	insufficient	yes	1137	Initial examination data	48	166.5	65.9	23.8	122	81	72	64	64	0.036	yes	75.4	yes	68.25	54.6	1.25	69.6
Summarized Data	0	1	0	0	1	0	0	0	0	yes	yes	yes	yes	0	0	HS(-)VFA(-)	5.6	5.8	0.2	0	24.3	25.1	0.8	0.6<BMI	0.039	0.037	-0.002	no	insufficient	no	1113	Initial examination data	45	171.2	71.1	24.3	115	76	39	159	132	0.039	yes	71	yes	64.75	57.45	1.13	63.1
Summarized Data	1	0	0	1	0	0	0	0	0	yes	yes	yes	yes	0	0	HS(-)VFA(-)	8.2	6.8	-1.4	1	25.1	25.1	0	BMI≤0	0.033	0.024	-0.009	no	insufficient	yes	671	Initial examination data	40	166	69.1	25.1	138	84	72	84	69	0.033	yes	59.5	yes	64	52.05	1.23	63.5
Summarized Data	0	1	0	0	0	0	0	0	0	yes	yes	yes	yes	0	0	HS(-)VFA(-)	2.9	6.4	3.5	0	25.7	24.2	-1.5	BMI≤0	0.394	0.024	-0.37	no	insufficient	no	232	Initial examination data	41	170.2	74.5	25.7	127	77	40	119	166	0.394	yes	61.5	yes	64.45	53.5	1.2	65.3
Summarized Data	0	0	0	0	0	0	0	0	0	yes	yes	yes	yes	0	0	HS(-)VFA(-)	12	15.1	3.1	0	20	19.8	-0.2	BMI≤0	0.016	0.011	-0.005	no	sufficient	no	944	Initial examination data	42	179.2	64.3	20	120	73	71	96	67	0.016	yes	21.9	yes	60.3	56.2	1.07	60
Summarized Data	0	0	0	0	0	0	0	0	0	yes	yes	yes	yes	0	0	HS(-)VFA(-)	4.5	8.1	3.6	0	23.2	23.2	0	BMI≤0	0.061	0.1	0.039	yes	insufficient	yes	413	Initial examination data	41	167.1	64.9	23.2	115	78	53	168	131	0.061	yes	66.6	yes	59.1	56.25	1.05	56.7
Summarized Data	0	0	0	0	0	0	0	0	0	yes	yes	yes	yes	0	0	HS(-)VFA(-)	13.8	15.1	1.3	0	18.9	20.2	1.3	0.6<BMI	0.037	0.442	0.405	yes	insufficient	no	1126	Initial examination data	40	169.3	54.3	18.9	124	75	66	97	59	0.037	yes	29.7	yes	67.2	55.5	1.21	67.3
Summarized Data	0	0	1	0	0	0	0	0	0	yes	yes	yes	yes	0	0	HS(-)VFA(-)	5.2	5.7	0.5	0	24.1	23	-1.1	BMI≤0	0.038	0.024	-0.014	no	insufficient	no	546	Initial examination data	42	176.7	75.4	24.1	116	73	53	143	133	0.038	yes	91.9	yes	67.95	58	1.17	66.1
Summarized Data	1	0	0	1	1	1	0	1	1	yes	yes	no	no	1	1	HS(+)VFA(+)	7	5.6	-1.4	1	27.9	31.6	3.7	0.6<BMI	0.023	0.081	0.058	yes	sufficient	no	728	Initial examination data	46	177.9	88.3	27.9	122	77	45	125	111	0.023	yes	69.5	yes	63.95	56.25	1.14	64.1
Summarized Data	0	0	0	0	0	0	0	0	0	yes	yes	yes	no	1	0	HS(+)VFA(-)	7.5	4	-3.5	1	23.7	23.5	-0.2	BMI≤0	0.046	0.037	-0.009	no	sufficient	no	261	Initial examination data	42	172	70.2	23.7	121	79	42	129	100	0.046	yes	78.7	yes	58.65	57.05	1.03	59.2
Summarized Data	0	1	0	0	0	0	0	0	0	yes	yes	no	yes	0	1	HS(-)VFA(+)	6.5	6.6	0.1	0	24.5	25.3	0.8	0.6<BMI	0.056	0.048	-0.008	no	insufficient	no	199	Initial examination data	46	166.8	68.2	24.5	116	72	58	159	178	0.056	yes	83.2	yes	61.65	55.55	1.11	62
Summarized Data	0	0	0	0	0	0	0	0	0	yes	yes	yes	yes	0	0	HS(-)VFA(-)	11.8	20	8.2	0	23.1	22.8	-0.3	BMI≤0	0.018	0.014	-0.004	no	sufficient	no	1100	Initial examination data	46	170.7	67.4	23.1	99	64	64	138	63	0.018	yes	37.1	yes	57.95	51.35	1.13	59.6
Summarized Data	1	1	0	1	0	0	0	0	0	yes	yes	yes	yes	0	0	HS(-)VFA(-)	8.3	7.4	-0.9	1	17.6	18	0.4	0<BMI≤0.6	0.013	0.183	0.17	yes	insufficient	yes	1107	Initial examination data	42	173.9	53.2	17.6	130	81	53	67	175	0.013	yes	15.2	yes	61.55	55.15	1.12	62.3
Summarized Data	0	0	0	0	0	0	0	0	0	yes	yes	yes	no	1	0	HS(+)VFA(-)	7.1	6.7	-0.4	1	29.7	31.9	2.2	0.6<BMI	0.017	0.067	0.05	yes	insufficient	no	806	Initial examination data	40	176	92	29.7	127	68	43	84	66	0.017	yes	61.8	yes	57.85	56.05	1.03	59.5
Summarized Data	0	1	0	0	0	0	0	0	0	yes	yes	yes	yes	0	0	HS(-)VFA(-)	7	11.2	4.2	0	22.5	20.6	-1.9	BMI≤0	0.015	0.014	-0.001	no	sufficient	no	418	Initial examination data	45	160.1	57.6	22.5	99	65	39	132	102	0.015	yes	46.9	yes	60.2	54.75	1.1	59.5
Summarized Data	0	0	0	1	0	0	1	0	0	yes	yes	yes	yes	0	0	HS(-)VFA(-)	5	6.9	1.9	0	24.1	23.4	-0.7	BMI≤0	0.088	0.039	-0.049	no	insufficient	yes	364	Initial examination data	46	178.3	76.7	24.1	123	81	46	137	115	0.088	yes	80.7	yes	63.2	52.9	1.19	66.4
Summarized Data	1	0	1	1	0	0	0	0	0	yes	yes	yes	yes	0	0	HS(-)VFA(-)	9.2	16	6.8	0	20.9	21	0.1	0<BMI≤0.6	0.007	0.005	-0.002	no	insufficient	yes	1119	Initial examination data	59	169	59.7	20.9	148	94	75	106	54	0.007	yes	75.7	yes	66.1	54.35	1.22	67.6
Summarized Data	0	0	0	0	1	0	0	1	0	yes	yes	yes	yes	0	0	HS(-)VFA(-)	17.1	10.2	-6.9	1	19.6	20.8	1.2	0.6<BMI	0.148	0.133	-0.015	no	sufficient	no	1093	Initial examination data	55	171	57.3	19.6	123	76	40	106	82	0.148	yes	33.8	yes	67.45	59.85	1.13	67.4
Summarized Data	0	0	0	0	0	0	0	0	0	yes	yes	yes	yes	0	0	HS(-)VFA(-)	10.4	25.3	14.9	0	22	22.2	0.2	0<BMI≤0.6	0.091	0.006	-0.085	no	insufficient	no	1037	Initial examination data	40	163.7	59	22	127	82	67	102	42	0.091	yes	42	yes	68.65	53.35	1.29	66.2
Summarized Data	1	1	1	1	1	1	0	0	0	yes	yes	yes	yes	0	0	HS(-)VFA(-)	5.6	6.5	0.9	0	25.1	25.6	0.5	0<BMI≤0.6	0.005	0.005	0	no	insufficient	no	1043	Initial examination data	49	163.9	67.5	25.1	145	93	88	79	74	0.005	yes	90.4	yes	66.15	52.2	1.27	65.6
Summarized Data	0	0	0	0	0	1	0	0	1	yes	yes	yes	yes	0	0	HS(-)VFA(-)	6	5.5	-0.5	1	24.4	24.2	-0.2	BMI≤0	0.018	0.05	0.032	yes	insufficient	no	370	Initial examination data	44	171.8	71.9	24.4	123	79	43	116	97	0.018	yes	75.9	yes	65	58.35	1.11	64.3
Summarized Data	1	0	1	0	0	0	0	0	0	yes	yes	yes	yes	0	0	HS(-)VFA(-)	3.6	12.1	8.5	0	22.9	22.5	-0.4	BMI≤0	0.017	0.037	0.02	yes	insufficient	no	1269	Initial examination data	48	172.4	68.2	22.9	135	89	55	118	122	0.017	yes	77	yes	57.7	50.25	1.15	57.2
Summarized Data	0	0	0	1	0	0	1	0	0	yes	yes	yes	yes	0	0	HS(-)VFA(-)	8	6.5	-1.5	1	20.1	19.3	-0.8	BMI≤0	0.061	0.027	-0.034	no	insufficient	yes	862	Initial examination data	51	178.4	64.1	20.1	118	78	59	67	99	0.061	yes	38.9	yes	67.05	55.45	1.21	68.1
Summarized Data	0	0	0	0	0	1	0	0	1	yes	yes	yes	yes	0	0	HS(-)VFA(-)	11.4	9.1	-2.3	1	21.9	21	-0.9	BMI≤0	0.017	0.011	-0.006	no	insufficient	no	952	Initial examination data	55	182.3	72.7	21.9	126	82	52	81	121	0.017	yes	92.5	yes	63.95	50.85	1.26	66
Summarized Data	0	1	0	0	1	0	0	0	0	yes	yes	yes	yes	0	0	HS(-)VFA(-)	6.2	17.2	11	0	20.8	21	0.2	0<BMI≤0.6	0.018	0.022	0.004	yes	sufficient	yes	279	Initial examination data	44	177.6	65.5	20.8	112	70	67	114	61	0.018	yes	67.3	yes	68.7	55.95	1.23	67.2
Summarized Data	0	0	1	0	0	1	0	0	0	yes	yes	yes	yes	0	0	HS(-)VFA(-)	1.9	2.5	0.6	0	22.3	22.5	0.2	0<BMI≤0.6	0.015	0.015	0	no	insufficient	no	973	Initial examination data	42	174.1	67.6	22.3	117	67	45	112	107	0.015	yes	70.8	yes	60.2	53.1	1.13	63.1
Summarized Data	1	0	0	0	0	0	0	0	0	yes	yes	yes	yes	0	0	HS(-)VFA(-)	12.6	6.9	-5.7	1	23.7	25.1	1.4	0.6<BMI	0.337	0.041	-0.296	no	insufficient	no	756	Initial examination data	44	179.4	76.3	23.7	139	89	61	102	77	0.337	yes	91.3	yes	61.25	54.05	1.13	61.7
Summarized Data	0	0	0	0	0	0	0	0	0	yes	yes	yes	yes	0	0	HS(-)VFA(-)	10.1	16.7	6.6	0	20	22.3	2.3	0.6<BMI	0.047	0.017	-0.03	no	sufficient	no	1128	Initial examination data	48	157.8	49.9	20	120	80	64	92	84	0.047	yes	28.1	yes	65.55	53.45	1.23	67.6
Summarized Data	0	1	0	0	1	0	0	0	0	yes	yes	yes	yes	0	0	HS(-)VFA(-)	10.5	9	-1.5	1	18.2	19.2	1	0.6<BMI	0.543	0.068	-0.475	no	insufficient	yes	958	Initial examination data	43	174.6	55.4	18.2	120	76	52	128	228	0.543	yes	37.5	yes	64.45	57.3	1.12	63.7
Summarized Data	1	0	0	1	0	0	0	0	0	yes	yes	yes	yes	0	0	HS(-)VFA(-)	5.3	7.4	2.1	0	24.3	24.1	-0.2	BMI≤0	0.023	0.007	-0.016	no	insufficient	yes	1064	Initial examination data	45	166.2	67.1	24.3	149	96	62	148	129	0.023	yes	45	yes	66.1	53.4	1.24	63.9
Summarized Data	1	0	0	0	0	0	0	0	0	yes	yes	yes	yes	0	0	HS(-)VFA(-)	5.1	8.1	3	0	25.5	26.8	1.3	0.6<BMI	0.005	0.007	0.002	yes	insufficient	no	1022	Initial examination data	40	169.1	73	25.5	129	87	49	120	37	0.005	yes	32.4	yes	63.95	55.7	1.15	63.6
Summarized Data	1	0	0	1	0	0	0	0	0	yes	yes	yes	yes	0	0	HS(-)VFA(-)	3.3	4.7	1.4	0	22.6	21.8	-0.8	BMI≤0	0.03	0.028	-0.002	no	insufficient	yes	371	Initial examination data	43	169.6	65.1	22.6	135	81	56	106	107	0.03	yes	60.9	yes	60.05	58.5	1.03	60.8
Summarized Data	0	0	0	1	0	0	1	0	0	yes	yes	no	yes	0	1	HS(-)VFA(+)	6.6	11.1	4.5	0	22.2	23.9	1.7	0.6<BMI	0.024	0.167	0.143	yes	insufficient	no	1205	Initial examination data	42	187.3	77.9	22.2	113	75	53	125	104	0.024	yes	73.5	yes	69.7	56.05	1.24	70.3
Summarized Data	0	0	0	0	0	0	0	0	0	yes	yes	yes	yes	0	0	HS(-)VFA(-)	27.1	15.4	-11.7	1	19.7	22	2.3	0.6<BMI	0.009	0.015	0.006	yes	insufficient	yes	1173	Initial examination data	45	170.7	57.5	19.7	105	72	70	90	86	0.009	yes	54.5	yes	63.35	55.85	1.13	63.7
Summarized Data	0	1	1	1	0	0	1	0	0	yes	yes	no	yes	0	1	HS(-)VFA(+)	3.5	6.4	2.9	0	26.8	26.5	-0.3	BMI≤0	0.015	0.02	0.005	yes	insufficient	no	309	Initial examination data	49	165.7	73.6	26.8	129	84	44	124	163	0.015	yes	83	yes	59.75	48.9	1.22	59.9
Summarized Data	0	0	0	0	0	0	0	0	0	yes	yes	yes	yes	0	0	HS(-)VFA(-)	33.3	20.9	-12.4	1	19.8	19.7	-0.1	BMI≤0	0.021	0.038	0.017	yes	sufficient	yes	880	Initial examination data	49	176.6	61.7	19.8	114	75	55	87	30	0.021	yes	92.5	yes	61.8	56.2	1.1	62.1
Summarized Data	1	0	0	0	0	1	0	0	1	yes	yes	yes	yes	0	0	HS(-)VFA(-)	6.6	7.4	0.8	0	24.9	24.3	-0.6	BMI≤0	0.017	0.014	-0.003	no	insufficient	no	823	Initial examination data	43	172.7	74.3	24.9	135	82	77	97	67	0.017	yes	50.1	yes	61.75	56.7	1.09	63.1
Summarized Data	0	0	0	0	0	0	0	0	0	yes	yes	yes	yes	0	0	HS(-)VFA(-)	9.2	6.4	-2.8	1	23.3	23.2	-0.1	BMI≤0	0.014	0.01	-0.004	no	sufficient	yes	772	Initial examination data	42	177.8	73.7	23.3	112	73	59	140	58	0.014	yes	48	yes	65.25	56.6	1.15	64.5
Summarized Data	1	0	0	1	0	0	0	0	0	yes	yes	yes	yes	0	0	HS(-)VFA(-)	5.3	5	-0.3	1	23.9	24.1	0.2	0<BMI≤0.6	0.014	0.007	-0.007	no	sufficient	no	1119	Initial examination data	60	165.1	65.1	23.9	125	85	50	89	71	0.014	yes	67.8	yes	64.25	57.8	1.11	65.7
Summarized Data	0	0	0	0	0	0	0	0	0	yes	yes	yes	no	1	0	HS(+)VFA(-)	11	5.5	-5.5	1	26.2	26.2	0	BMI≤0	0.038	0.06	0.022	yes	insufficient	no	742	Initial examination data	40	174.1	79.5	26.2	120	78	56	122	90	0.038	yes	64.8	yes	64.1	50.5	1.27	63.9
Summarized Data	0	0	0	1	0	0	1	0	0	yes	yes	yes	yes	0	0	HS(-)VFA(-)	6.6	6.9	0.3	0	25.5	26.1	0.6	0<BMI≤0.6	0.068	0.676	0.608	yes	insufficient	no	1129	Initial examination data	55	160.6	65.7	25.5	122	78	47	124	81	0.068	yes	77.6	yes	66.3	50.3	1.32	65.2
Summarized Data	0	0	0	0	1	0	0	1	0	yes	yes	no	yes	0	1	HS(-)VFA(+)	5.7	7	1.3	0	24.8	25.2	0.4	0<BMI≤0.6	0.261	0.207	-0.054	no	insufficient	yes	224	Initial examination data	50	174.4	75.5	24.8	109	79	44	144	131	0.261	yes	63	yes	64.35	56.2	1.15	64.7
Summarized Data	0	0	0	0	0	0	0	0	0	yes	yes	yes	yes	0	0	HS(-)VFA(-)	8	10.9	2.9	0	20.6	20.1	-0.5	BMI≤0	0.345	0.016	-0.329	no	insufficient	no	972	Initial examination data	43	181.3	67.6	20.6	127	82	60	96	56	0.345	yes	44.5	yes	63	55.15	1.14	62.8
Summarized Data	0	0	0	0	0	0	0	0	0	yes	yes	yes	yes	0	0	HS(-)VFA(-)	12.1	14.4	2.3	0	17.6	20.2	2.6	0.6<BMI	0.018	0.005	-0.013	no	sufficient	no	846	Initial examination data	41	168.8	50.2	17.6	99	65	71	45	39	0.018	yes	39.6	yes	66.45	52.85	1.26	67.7
Summarized Data	0	0	0	0	0	0	0	0	0	yes	yes	yes	yes	0	0	HS(-)VFA(-)	9.1	7	-2.1	1	23	23.4	0.4	0<BMI≤0.6	0.021	0.042	0.021	yes	insufficient	yes	720	Initial examination data	63	173.6	69.4	23	129	81	44	146	84	0.021	yes	91.7	yes	67.6	53.45	1.26	69.1
Summarized Data	1	0	1	1	0	0	0	0	0	yes	yes	yes	yes	0	0	HS(-)VFA(-)	18.8	38.6	19.8	0	23.5	24.7	1.2	0.6<BMI	0.01	0.011	0.001	yes	sufficient	yes	651	Initial examination data	72	157.9	58.7	23.5	137	77	69	56	41	0.01	yes	24.7	yes	66.2	53.95	1.23	66.9
Summarized Data	0	0	0	0	0	0	0	0	0	yes	yes	yes	yes	0	0	HS(-)VFA(-)	15.8	10.5	-5.3	1	23.6	23.3	-0.3	BMI≤0	0.01	0.011	0.001	yes	insufficient	yes	1073	Initial examination data	55	173.6	71.2	23.6	110	76	55	91	105	0.01	yes	64.3	yes	69.35	54.65	1.27	70.8
Summarized Data	1	0	0	1	0	0	0	0	0	yes	yes	yes	yes	0	0	HS(-)VFA(-)	7.7	11.5	3.8	0	22.3	22.2	-0.1	BMI≤0	0.015	0.028	0.013	yes	insufficient	yes	761	Initial examination data	57	172.7	66.6	22.3	139	87	87	107	47	0.015	yes	23.5	yes	64.75	53.15	1.22	65.2
Summarized Data	0	0	0	0	0	0	0	0	0	yes	yes	yes	yes	0	0	HS(-)VFA(-)	7	14.6	7.6	0	19.1	19.6	0.5	0<BMI≤0.6	0.059	0.011	-0.048	no	insufficient	no	721	Initial examination data	48	178.4	60.7	19.1	103	76	52	161	60	0.059	yes	51	yes	58.9	52.25	1.13	58.8
Summarized Data	1	0	0	1	0	1	0	0	1	yes	yes	yes	yes	0	0	HS(-)VFA(-)	4.8	3.8	-1	1	24.3	24.3	0	BMI≤0	0.021	0.012	-0.009	no	sufficient	yes	301	Initial examination data	49	165.3	66.4	24.3	138	83	94	75	64	0.021	yes	56.3	yes	59	57.25	1.03	58.1
Summarized Data	0	0	0	0	0	0	0	0	0	yes	yes	yes	yes	0	0	HS(-)VFA(-)	13.3	12.4	-0.9	1	23	22.1	-0.9	BMI≤0	0.009	0.012	0.003	yes	sufficient	no	370	Initial examination data	56	181.9	76	23	117	78	54	126	58	0.009	yes	57.5	yes	61.45	55.2	1.11	63.8
Summarized Data	0	0	0	0	0	0	0	0	0	yes	yes	yes	yes	0	0	HS(-)VFA(-)	9.7	12.1	2.4	0	18.9	19.2	0.3	0<BMI≤0.6	0.004	0.012	0.008	yes	insufficient	no	365	Initial examination data	50	175.9	58.5	18.9	121	77	62	134	47	0.004	yes	34.7	yes	66.9	60	1.12	65.4
Summarized Data	0	1	0	0	0	0	0	0	0	yes	yes	no	yes	0	1	HS(-)VFA(+)	5.9	8.9	3	0	21.4	21.1	-0.3	BMI≤0	0.023	0.048	0.025	yes	insufficient	yes	847	Initial examination data	43	172	63.3	21.4	127	80	72	146	174	0.023	yes	83.1	yes	65.75	52.45	1.25	69.9
Summarized Data	1	0	1	1	0	0	0	0	0	yes	yes	yes	no	1	0	HS(+)VFA(-)	2.3	4.8	2.5	0	20.8	21.4	0.6	0<BMI≤0.6	0.033	0.03	-0.003	no	insufficient	no	310	Initial examination data	42	173.8	62.7	20.8	137	86	50	157	102	0.033	yes	75.2	yes	57.55	50.85	1.13	58.3
Summarized Data	0	0	0	0	0	0	0	0	0	yes	yes	yes	yes	0	0	HS(-)VFA(-)	7.3	11.2	3.9	0	24.2	24.1	-0.1	BMI≤0	0.038	0.048	0.01	yes	insufficient	yes	974	Initial examination data	42	167.1	67.5	24.2	116	70	65	110	102	0.038	yes	58.8	yes	56.45	48.85	1.16	57.4
Summarized Data	0	0	0	0	0	0	0	0	0	yes	yes	yes	yes	0	0	HS(-)VFA(-)	15.5	16.4	0.9	0	20.4	20.9	0.5	0<BMI≤0.6	0.023	0.008	-0.015	no	sufficient	yes	441	Initial examination data	48	164.1	55	20.4	129	78	57	107	101	0.023	yes	34.5	yes	72.95	58.4	1.25	75.6
Summarized Data	0	0	0	0	0	0	0	0	0	yes	yes	yes	yes	0	0	HS(-)VFA(-)	14.2	9.5	-4.7	1	24.2	25.3	1.1	0.6<BMI	0.008	0.013	0.005	yes	insufficient	yes	490	Initial examination data	51	166.6	67.2	24.2	105	62	53	129	91	0.008	yes	47.8	yes	66.9	54.85	1.22	68.4
Summarized Data	1	0	0	1	0	0	0	0	0	yes	yes	yes	yes	0	0	HS(-)VFA(-)	12.7	15.2	2.5	0	20.1	20.6	0.5	0<BMI≤0.6	0.045	0.015	-0.03	no	sufficient	yes	371	Initial examination data	46	171.7	59.3	20.1	137	90	67	126	131	0.045	yes	93.5	yes	69.3	55.5	1.25	65.6
Summarized Data	0	0	0	1	0	0	1	0	0	yes	yes	yes	yes	0	0	HS(-)VFA(-)	11.5	18.2	6.7	0	22.6	22.9	0.3	0<BMI≤0.6	0.028	0.018	-0.01	no	sufficient	no	659	Initial examination data	39	176.5	70.4	22.6	117	73	50	130	30	0.028	yes	20.6	yes	56.75	55.65	1.02	56.2
Summarized Data	0	0	0	0	0	0	0	0	0	yes	yes	yes	yes	0	0	HS(-)VFA(-)	5.5	8.7	3.2	0	22.2	22.2	0	BMI≤0	0.032	0.019	-0.013	no	insufficient	no	357	Initial examination data	45	164.7	60.1	22.2	120	73	62	85	58	0.032	yes	78.3	yes	70.45	52.85	1.33	71
Summarized Data	0	0	0	0	0	0	0	0	0	yes	yes	yes	yes	0	0	HS(-)VFA(-)	8.1	13.7	5.6	0	22.9	23.1	0.2	0<BMI≤0.6	0.028	0.02	-0.008	no	insufficient	yes	340	Initial examination data	41	171.9	67.6	22.9	125	73	71	129	94	0.028	yes	75.2	yes	59.05	48	1.23	58.2
Summarized Data	0	0	0	0	0	0	0	0	0	yes	yes	yes	yes	0	0	HS(-)VFA(-)	10.4	8.3	-2.1	1	25.1	24.3	-0.8	BMI≤0	0.041	0.018	-0.023	no	insufficient	no	427	Initial examination data	42	185.9	86.9	25.1	115	72	54	120	57	0.041	yes	71.7	yes	58.35	54.6	1.07	59
Summarized Data	1	0	0	1	0	0	0	0	0	yes	yes	yes	yes	0	0	HS(-)VFA(-)	13.6	12.3	-1.3	1	22.3	21.8	-0.5	BMI≤0	0.016	0.012	-0.004	no	sufficient	yes	363	Initial examination data	63	172.5	66.5	22.3	131	86	59	137	100	0.016	yes	38.8	yes	70.35	53.8	1.31	73.8
Summarized Data	1	1	0	0	0	0	0	0	0	yes	yes	yes	yes	0	0	HS(-)VFA(-)	8.9	7.5	-1.4	1	23	21.6	-1.4	BMI≤0	0.025	0.026	0.001	yes	insufficient	no	365	Initial examination data	51	171.5	67.6	23	131	86	53	165	160	0.025	yes	83.4	yes	63.3	55	1.15	64.5
[truncated: 54 more columns]
